# Supplementary material
Source: PubMed Central journal article supplement (PMC10033811)
Supplement: 10815_2022_2679_MOESM2_ESM.pdf [file 10815_2022_2679_MOESM2_ESM.pdf]

# Supplementary Material - 1

Salama M, Ataman L, Taha T, et al. [Building Oncofertility Core Competency in Developing Countries: Experience from Egypt, Tunisia, Brazil, Peru, and Panama](#). J Glob Oncol. 2018;4:1-11.

**Table 1: Developing Country's Profile**

|                                         | <b>Egypt</b>                                | <b>Tunisia</b>                                                                     | <b>Brazil</b>                                                 | <b>Peru</b>                                                                                 | <b>Panama</b>                                    |
|-----------------------------------------|---------------------------------------------|------------------------------------------------------------------------------------|---------------------------------------------------------------|---------------------------------------------------------------------------------------------|--------------------------------------------------|
| Area (million km <sup>2</sup> )         | 1                                           | 0.16                                                                               | 8.5                                                           | 1.28                                                                                        | 0.07                                             |
| Location                                | Africa                                      | Africa                                                                             | South America                                                 | South America                                                                               | Central America                                  |
| Language                                | Arabic                                      | Arabic                                                                             | Portuguese                                                    | Spanish                                                                                     | Spanish                                          |
| Population (million)                    | 92                                          | 11                                                                                 | 206                                                           | 31                                                                                          | 3.4                                              |
| Fertility rate (births per woman)       | 2.8                                         | 1.98                                                                               | 1.9                                                           | 2.26                                                                                        | 2.4                                              |
| Religion                                | 90% Muslims<br>9% Christians<br>1% others   | 99 % Muslims<br>1% Christians and Jewish                                           | 65% Catholic<br>22% Protestant<br>8% No Religion<br>5% Others | 80% Catholics<br>20% others                                                                 | 74% Catholics<br>19% Protestants<br>7% other     |
| Culture                                 | Conservative                                | Conservative                                                                       | Eclectic and syncretic                                        | Conservative                                                                                | Conservative                                     |
| Economy                                 | Lower-middle income country                 | Lower-middle income country                                                        | Upper-middle-income country                                   | Upper-middle income country                                                                 | Upper-middle income country                      |
| Nominal GDP Total (billion USD)         | 330                                         | 43.6                                                                               | 2469                                                          | 189                                                                                         | 52                                               |
| Nominal GDP Per Capita (thousand USD)   | 3740                                        | 3922                                                                               | 11979                                                         | 5700                                                                                        | 13268                                            |
| Global Competitiveness Index (GCI)      | 116                                         | 92                                                                                 | 75                                                            | 67                                                                                          | 50                                               |
| Health system world ranking in GCI      | 86                                          | 52                                                                                 | 69                                                            | 98                                                                                          | 55                                               |
| Life expectancy in years (Females)      | 73                                          | 77.8                                                                               | 79                                                            | 77                                                                                          | 81                                               |
| Life expectancy in years (Males)        | 69                                          | 73                                                                                 | 71                                                            | 72                                                                                          | 75                                               |
| Total Expenditure on Health as % of GDP | 5%                                          | 7%                                                                                 | 10%                                                           | 5%                                                                                          | 8%                                               |
| Expenditure on Health (Sources)         | 72% out-of-pocket<br>25% state<br>3% others | 37% from Tunisian households,<br>35% from CNAM<br>28% directly from the government | 52% out-of-pocket<br>48% state                                | 35% out-of-pocket<br>30% contribution of employers (tax expenses)<br>31% state<br>4% others | 73.2% state<br>22.3% out-of-pocket<br>4.5% other |
| State's Health Insurance                | Covers 40% of populations                   | Covers 80% of populations                                                          | Covers 100% of population                                     | Covers 62% of population                                                                    | Covers 37% of population                         |

**Table 2: Cancer Care**

|                                          | <b>Egypt</b>                                                                                                                                                                                                                                                                                                                    | <b>Tunisia</b>                                                                                                                                                                                                                                                                                                 | <b>Brazil</b>                                                                                                                                                                                                                                                                                             | <b>Peru</b>                                                                                                                                                                                                                                                                                                                                                        | <b>Panama</b>                                                                                                                                                                                                                                                                                                                                                                                |
|------------------------------------------|---------------------------------------------------------------------------------------------------------------------------------------------------------------------------------------------------------------------------------------------------------------------------------------------------------------------------------|----------------------------------------------------------------------------------------------------------------------------------------------------------------------------------------------------------------------------------------------------------------------------------------------------------------|-----------------------------------------------------------------------------------------------------------------------------------------------------------------------------------------------------------------------------------------------------------------------------------------------------------|--------------------------------------------------------------------------------------------------------------------------------------------------------------------------------------------------------------------------------------------------------------------------------------------------------------------------------------------------------------------|----------------------------------------------------------------------------------------------------------------------------------------------------------------------------------------------------------------------------------------------------------------------------------------------------------------------------------------------------------------------------------------------|
| Cancer incidence rate (per 100,000)      | 166                                                                                                                                                                                                                                                                                                                             | 116                                                                                                                                                                                                                                                                                                            | 291                                                                                                                                                                                                                                                                                                       | 150                                                                                                                                                                                                                                                                                                                                                                | 147.9                                                                                                                                                                                                                                                                                                                                                                                        |
| Cancer mortality rate (per 100,000)      | 95                                                                                                                                                                                                                                                                                                                              | 66.7                                                                                                                                                                                                                                                                                                           | 92                                                                                                                                                                                                                                                                                                        | 92                                                                                                                                                                                                                                                                                                                                                                 | 70.6                                                                                                                                                                                                                                                                                                                                                                                         |
| Common cancers in women (%)              | Breast (32%), liver (13%), brain (5%), ovary (4%), Non-Hodgkin lymphoma (4%), and thyroid (3%).                                                                                                                                                                                                                                 | Breast (31.9%), skin (5.7%), colon (5.7%), cervix (4.3%), ovary (4.1%), and Non-Hodgkin's lymphoma (3.7%)                                                                                                                                                                                                      | Breast (28%), colon and rectum (9%), uterine cervix (8%), lung and respiratory system (5%), and stomach (4%).                                                                                                                                                                                             | Cervix (24%), Breast (17%), Stomach (9%) and Skin (6%)                                                                                                                                                                                                                                                                                                             | Breast (36.6%), Cervix (26.6%), Colon (13.4%), Stomach (10.4%), Lung (6.8%), Ovary (6.2%).                                                                                                                                                                                                                                                                                                   |
| Common cancers in men (%)                | Liver (33%), bladder (10%), lung (6%), Non-Hodgkin lymphoma (5%), brain (5%), and prostate (4%).                                                                                                                                                                                                                                | Lung (22.9%), bladder (9.9%), prostate (8.9%), skin (5.9%), colon (5.3%), and stomach (4.5%)                                                                                                                                                                                                                   | Prostate (29%), lung and respiratory system (8%), colon and rectum (8%), stomach (6%), and mouth (5%).                                                                                                                                                                                                    | Prostate (15%), Stomach (15%), Skin (8%), Hematopoietic system (7%) and Lung (6%)                                                                                                                                                                                                                                                                                  | Prostate (54.7%), Stomach (13.3%), Lung (11.3%), Colon (11.1%), Oral (4%), Liver (3.5%), Esophageal (2.1%)                                                                                                                                                                                                                                                                                   |
| Cancer treatments providers and coverage | <ul style="list-style-type: none"> <li>- National cancer institutes, university hospitals, specialized cancer hospitals and public hospitals provide for free services or are covered by insurance.</li> <li>- Some major private hospitals provide cancer treatments covered by insurance or out-of-pocket payment.</li> </ul> | <p>The National Cancer Institute of Salah Azaiz covers 25% of cases, other patients diagnosed with cancer are cared for either in the university hospitals of Sousse and Sfax or in private structures.</p> <p>Cancer treatment provide from 50% of households, 35% of the government, and 15% of the CNAM</p> | <ul style="list-style-type: none"> <li>- Cancer institutes, university hospitals and specialized public hospitals provide services covered by the national public health system.</li> <li>- Private hospitals provide cancer treatments covered by private insurance or out-of-pocket payment.</li> </ul> | <ul style="list-style-type: none"> <li>- Coverage of cancer treatments are possible through FISSAL (Fondo Intangible Solidario de Salud) and an integrated health system (SIS, Sistema Integral de Salud).</li> <li>- Cancer treatment providers include The National cancer institute (INEN), public hospitals and private specialized cancer clinics.</li> </ul> | <ul style="list-style-type: none"> <li>- National Institute of Oncology is a large public hospital providing mostly for free and public health insurance services.</li> <li>- Large public hospitals also provide some cancer treatments for insured and uninsured patients.</li> <li>- Private hospitals and private providers, private health insurance or out-of-pocket costs.</li> </ul> |
| National cancer registry                 | Under development                                                                                                                                                                                                                                                                                                               | 3 cancer registry: registry of the north-Tunisia; registry of center region and registry of south Tunisia.                                                                                                                                                                                                     | Fully implemented                                                                                                                                                                                                                                                                                         | Under development                                                                                                                                                                                                                                                                                                                                                  | The Gorgas Memorial Institute for Health Studies/ Geographic Information System of Incidence and Mortality by Cancer.                                                                                                                                                                                                                                                                        |

**Table 3: Fertility Treatments**

|                                                  |                            | <b>Egypt</b>                                | <b>Tunisia</b>                                                                                                                                 | <b>Brazil</b>                                                           | <b>Peru</b>                                                      | <b>Panama</b>                               |
|--------------------------------------------------|----------------------------|---------------------------------------------|------------------------------------------------------------------------------------------------------------------------------------------------|-------------------------------------------------------------------------|------------------------------------------------------------------|---------------------------------------------|
| Who can receive fertility treatments?            |                            | Married heterosexual couples only           | Married heterosexual couples only                                                                                                              | Married/Stable union heterosexual and homosexual couples, Single women. | Married/unmarried couples/persons                                | Unregulated, provider dependent             |
| Assisted Reproductive Techniques (ART)           | IUI                        | Available                                   | Available                                                                                                                                      | Available                                                               | Available                                                        | Available                                   |
|                                                  | IVF                        | Available                                   | Available                                                                                                                                      | Available                                                               | Available                                                        | Available                                   |
|                                                  | ICSI                       | Available                                   | Available                                                                                                                                      | Available                                                               | Available                                                        | Available                                   |
|                                                  | PGD                        | Available                                   | Not available                                                                                                                                  | Available                                                               | Available                                                        | Available                                   |
|                                                  | Sex Selection              | Available                                   | Not available                                                                                                                                  | Available                                                               | Not available                                                    | Available                                   |
| Cryo-preservation                                | Embryo Freezing            | Available                                   | Available                                                                                                                                      | Available                                                               | Available                                                        | Available                                   |
|                                                  | Egg Freezing               | Available                                   | Available                                                                                                                                      | Available                                                               | Available                                                        | Available                                   |
|                                                  | Social egg freezing        | Not available                               | Not available                                                                                                                                  | Available                                                               | Not available                                                    | Available                                   |
|                                                  | Ovarian tissue freezing    | Not available                               | Will be available in 3 months                                                                                                                  | Available, under research projects                                      | Recently available                                               | Available                                   |
|                                                  | Sperm freezing             | Available                                   | Available                                                                                                                                      | Available                                                               | Available                                                        | Available                                   |
|                                                  | Testicular tissue freezing | Not available                               | Not available                                                                                                                                  | Available, under research projects                                      | Not available                                                    | Available                                   |
| Third Party Reproduction                         | Sperm donation             | Prohibited                                  | Prohibited                                                                                                                                     | Allowed                                                                 | Available but unregulated                                        | Available but unregulated                   |
|                                                  | Egg donation               | Prohibited                                  | Prohibited                                                                                                                                     | Allowed                                                                 | Available but unregulated                                        | Available but unregulated                   |
|                                                  | Embryo donation            | Prohibited                                  | Prohibited                                                                                                                                     | Allowed                                                                 | Available but unregulated                                        | Available but unregulated                   |
|                                                  | Surrogacy                  | Prohibited                                  | Prohibited                                                                                                                                     | Allowed                                                                 | Available but unregulated                                        | Available but unregulated                   |
| Adoption                                         |                            | Prohibited                                  | Allowed                                                                                                                                        | Allowed                                                                 | Allowed                                                          | Allowed                                     |
| Insurance coverage for fertility treatments      |                            | No                                          | Fertility treatments are covered by the CNAM, which fully supports 3 stimulation cycles in women under the age of 40 and who have no children. | Yes, but pretty recent. Majority of them no cover                       | No                                                               | No                                          |
| Fertility treatments providers                   |                            | 80% private centers<br>20% public hospitals | The centers of assisted medical procreation can do about 9000 IVF cycle/year, 1800 of which are provided in public centers                     | 93% private centers<br>7% public hospitals                              | Mostly private centers, only one public hospital                 | 90% private centers<br>10% public hospitals |
| Average cost of a single cycle of IVF/ICSI (USD) |                            | 500 - 1000                                  | 800 - 1500                                                                                                                                     | 1500 - 5000                                                             | 3500 - 5000                                                      | 2500 - 5000                                 |
| National registry                                |                            | Not available                               | Not available                                                                                                                                  | Available                                                               | Not available (but we have Regional Registry for Latin America). | Not available                               |

**Table 4: Fertility Preservation Treatments**

|                                                          |                            | <b>Egypt</b>                                            | <b>Tunisia</b>                   | <b>Brazil</b>                                                                            | <b>Peru</b>                                                   | <b>Panama</b>                   |
|----------------------------------------------------------|----------------------------|---------------------------------------------------------|----------------------------------|------------------------------------------------------------------------------------------|---------------------------------------------------------------|---------------------------------|
| Who can receive fertility preservation treatments?       |                            | Married heterosexual couples more than cancer patients. | Patients diagnosed with a cancer | Married/Stable union heterosexual and homosexual couples, Single women, cancer patients. | Married/unmarried couples/persons, more than cancer patients. | Unregulated, provider dependent |
| Cryo-preservation                                        | Embryo Freezing            | Available                                               | Available                        | Available                                                                                | Available                                                     | Available                       |
|                                                          | Egg Freezing               | Available                                               | Available                        | Available                                                                                | Available                                                     | Available                       |
|                                                          | Social egg freezing        | Not available                                           | Not available                    | Available                                                                                | Not available                                                 | Available                       |
|                                                          | Ovarian tissue freezing    | Not available                                           | Will be available in 3 months    | Available, under research projects                                                       | Recently available                                            | Available                       |
|                                                          | Sperm freezing             | Available                                               | Available                        | Available                                                                                | Available                                                     | Available                       |
|                                                          | Testicular tissue freezing | Not available                                           | Not available                    | Available, under research projects                                                       | Not available                                                 | Available                       |
| Insurance coverage for fertility preservation treatments |                            | No                                                      | No                               | Yes, but pretty recent. Majority of them no cover                                        | No                                                            | No                              |
| Fertility preservation treatments providers              |                            | 80% private centers<br>20% public hospitals             | 100% public hospitals            | 93% private centers<br>7% public hospitals                                               | Private centers                                               | 100% private centers            |
| Average cost of a single frozen cycle of IVF/ICSI (USD)  |                            | 500 - 1000                                              | 800 - 1500                       | 2000 - 5500                                                                              | 3500 - 5000                                                   | 1500 - 3500                     |
| National registry                                        |                            | Not available                                           | Not available                    | Available (not fully implemented - don't consider cancer patients alone).                | Not available                                                 | Not available                   |

**Table 5: Barriers to Oncofertility**

|                                                               | <b>Egypt</b> | <b>Tunisia</b> | <b>Brazil</b>                                         | <b>Peru</b>  | <b>Panama</b> |
|---------------------------------------------------------------|--------------|----------------|-------------------------------------------------------|--------------|---------------|
| <b>1- Medical Barriers</b>                                    |              |                |                                                       |              |               |
| Lack of awareness among oncologists, gynecologists & patients | Yes          | Yes            | Yes                                                   | Yes          | Yes           |
| Lack of advances in early diagnosis and treatment of cancer   | Yes          | Yes            | No                                                    | Yes          | Yes           |
| Lack of inter-institutional communications                    | Yes          | Yes            | Yes                                                   | Yes          | Yes           |
| Lack of referrals from oncologists                            | Yes          | Yes            | Yes                                                   | Yes          | Yes           |
| Lack of some fertility preservation options                   | Yes          | Yes            | Yes                                                   | Yes          | No            |
| Lack of oncofertility specialists                             | Yes          | Yes            | No                                                    | Yes          | No            |
|                                                               |              |                |                                                       |              |               |
| <b>2- Economic Barriers</b>                                   |              |                |                                                       |              |               |
| Lack of health insurance coverage for fertility services      | Yes          | Yes            | Yes. Coverage pretty recent. Few insurance companies. | Yes          | Yes           |
| Most of fertility services are provided in private centers    | Yes          | NO             | Yes                                                   | Yes          | Yes           |
| Lack of institution and research fund                         | Yes          | Yes            | Yes                                                   | Yes          | Yes           |
|                                                               |              |                |                                                       |              |               |
| <b>3- Social Barriers</b>                                     |              |                |                                                       |              |               |
| Sperm donation                                                | Not accepted | Not accepted   | Accepted                                              | Not accepted | Accepted      |
| Egg donation                                                  | Not accepted | Not accepted   | Accepted                                              | Not accepted | Accepted      |
| Embryo donation                                               | Not accepted | Not accepted   | Accepted                                              | Not accepted | Accepted      |
| Surrogacy                                                     | Not accepted | Not accepted   | Accepted                                              | Not accepted | Not Accepted  |
| Adoption                                                      | Accepted     | Accepted       | Accepted                                              | Accepted     | Accepted      |
|                                                               |              |                |                                                       |              |               |
| <b>4- Legal Barriers</b>                                      |              |                |                                                       |              |               |
| Sperm donation                                                | Prohibited   | Prohibited     | Allowed                                               | Unregulated  | Unregulated   |
| Egg donation                                                  | Prohibited   | Prohibited     | Allowed                                               | Unregulated  | Unregulated   |
| Embryo donation                                               | Prohibited   | Prohibited     | Allowed                                               | Unregulated  | Unregulated   |
| Surrogacy                                                     | Prohibited   | Prohibited     | Allowed                                               | Unregulated  | Unregulated   |
| Adoption                                                      | Prohibited   | Allowed        | Allowed                                               | Allowed      | Allowed       |

**Table 6: Opportunities to Oncofertility**

|                                       | <b>Egypt</b> | <b>Tunisia</b> | <b>Brazil</b> | <b>Peru</b> | <b>Panama</b> |
|---------------------------------------|--------------|----------------|---------------|-------------|---------------|
| Chances to overcome medical barriers  | Yes          | Yes            | Yes           | Yes         | Yes           |
| Chances to overcome economic barriers | Yes          | Yes            | Yes           | Yes         | Yes           |
| Chances to overcome social barriers   | No           | No             | Yes           | Yes         | Yes           |
| Chances to overcome legal barriers    | No           | No             | Yes           | Yes         | No            |

# Supplementary Material - 2

Salama M, Ataman-Millhouse L, Sobral F, et al. [Barriers and Opportunities of Oncofertility Practice in Nine Developing Countries and the Emerging Oncofertility Professional Engagement Network](#). J Glob Oncol. 2018;4:1-7.

**Table 1: Country's Profile 2016/2017 according to Human Development Reports – United Nations (UN)** <http://hdr.undp.org/en/countries>

|                                                                                   | Mexico                                                    | Colombia                                                   | Guatemala                                                                  | Argentina                                                       | Chile                                               | Nigeria                                             | South Africa                                              | Saudi Arabia                       | India                                                  |
|-----------------------------------------------------------------------------------|-----------------------------------------------------------|------------------------------------------------------------|----------------------------------------------------------------------------|-----------------------------------------------------------------|-----------------------------------------------------|-----------------------------------------------------|-----------------------------------------------------------|------------------------------------|--------------------------------------------------------|
| Area (million km <sup>2</sup> )                                                   | 1.96                                                      | 1.14                                                       | 0.1                                                                        | 2.78                                                            | 0.756                                               | 0.924                                               | 1.22                                                      | 2.15                               | 3.28                                                   |
| Location                                                                          | North America                                             | South America                                              | Central America                                                            | South America                                                   | South America                                       | Africa                                              | Africa                                                    | Asia                               | Asia                                                   |
| Language                                                                          | Spanish                                                   | Spanish                                                    | Spanish                                                                    | Spanish                                                         | Spanish                                             | English (Official)                                  | 11 official languages                                     | Arabic                             | Hindi                                                  |
| Population (million)                                                              | 127                                                       | 48.2                                                       | 16.58                                                                      | 43.85                                                           | 17.9                                                | 182.2                                               | 54                                                        | 32.28                              | 1320                                                   |
| Fertility rate (births per woman)                                                 | 2.2                                                       | 1.9                                                        | 3                                                                          | 2.31                                                            | 1.8                                                 | 5.42                                                | 2.34                                                      | 2.71                               | 2.5                                                    |
| Religion (%)                                                                      | 89.3% Catholics<br>8% Protestants                         | 87% Catholics<br>11.5% Protestants                         | 45% Catholics<br>42% Protestants<br>11% None/Atheist/Agnostic<br>2% Others | 66% Catholics<br>9% Protestants<br>21% No religion<br>3% Others | 55% Catholics<br>13% Protestants<br>25% No religion | 49.3% Christians<br>48.8% Muslims<br>1.9% Others    | 86% Christians<br>1.5% Muslims<br>1.2% Hindu<br>0.3% Jews | 100% Muslims                       | 80% Hindu<br>14% Muslims<br>2% Christians<br>4% Others |
| Culture                                                                           | Conservative                                              | Conservative                                               | Conservative                                                               | Eclectic                                                        | Conservative                                        | Conservative                                        | Multicultural                                             | Conservative                       | Conservative                                           |
| Economy                                                                           | Upper middle income country                               | Upper middle income country                                | Lower middle income country                                                | Upper middle income country                                     | High                                                | Lower middle income country                         | Upper middle income country                               | Upper income country               | Lower middle income country                            |
| Nominal GDP Total (billion USD)                                                   | 1047                                                      | 282                                                        | 69                                                                         | 644                                                             | 250                                                 | 494                                                 | 680                                                       | 689                                | 2848                                                   |
| Nominal GDP Per Capita (USD)                                                      | 8208                                                      | 5805                                                       | 4146                                                                       | 14686                                                           | 15793                                               | 2763                                                | 12390                                                     | 21100                              | 2134                                                   |
| Human Development Index (HDI) rank                                                | 77                                                        | 95                                                         | 125                                                                        | 45                                                              | 38                                                  | 152                                                 | 119                                                       | 38                                 | 131                                                    |
| Life expectancy in years (Females)                                                | 79.4                                                      | 77.8                                                       | 76.3                                                                       | 79                                                              | 84.7                                                | 56                                                  | 66.7                                                      | 75.9                               | 69.9                                                   |
| Life expectancy in years (Males)                                                  | 74.6                                                      | 70.7                                                       | 69.9                                                                       | 73                                                              | 79                                                  | 53                                                  | 61.2                                                      | 73.2                               | 66.9                                                   |
| Public health expenditure (% of GDP)                                              | 3.3                                                       | 5.4                                                        | 2.3                                                                        | 2.7                                                             | 3.9                                                 | 0.9                                                 | 4.2                                                       | 4.7                                | 1.4                                                    |
| Total Expenditure on Health (Resources %): State, Private, Out of pocket & Others | 52% State<br>6% Private<br>41% Out of pocket<br>1% Others | 67% State<br>11% Private<br>18% Out of pocket<br>4% Others | 32% State<br>14% Private<br>52% Out of pocket<br>2% Others                 | 43% State<br>19% Private<br>38% Others                          | 60% State<br>39% Out of pocket<br>1% Others         | 23.9% State<br>69.35% Out of pocket<br>6.75% Others | 49.2% State<br>48.2% Private<br>2.6% Others               | 74.5% State<br>25.5% Out of pocket | 30% State<br>70% Out of pocket                         |
| Health Insurance Coverage for population (%)                                      | 82%                                                       | 96.7%                                                      | 96%                                                                        | 100%                                                            | 100%                                                | 5%                                                  | 20%                                                       | 100%                               | 29%                                                    |

**Table 2: Cancer Care – WHO GLOBOCAN 2012** [http://globocan.iarc.fr/Pages/fact\\_sheets\\_population.aspx](http://globocan.iarc.fr/Pages/fact_sheets_population.aspx)

|                                                   | Mexico                                                                                                                                                                                                                                                                                                                                                                                                                                                                                                                    | Colombia                                                                                                                                                                                                                                                                                                                         | Guatemala                                                                                                                                                                                                                                                                                                                                                                                    | Argentina                                                                                                                                                                                                                                                                                                 | Chile                                                                                                                                                                                                                                                                                                     | Nigeria                                                                                                                                                                                       | South Africa                                                                                                                                                              | Saudi Arabia                                                                                 | India                                                                                                                                            |
|---------------------------------------------------|---------------------------------------------------------------------------------------------------------------------------------------------------------------------------------------------------------------------------------------------------------------------------------------------------------------------------------------------------------------------------------------------------------------------------------------------------------------------------------------------------------------------------|----------------------------------------------------------------------------------------------------------------------------------------------------------------------------------------------------------------------------------------------------------------------------------------------------------------------------------|----------------------------------------------------------------------------------------------------------------------------------------------------------------------------------------------------------------------------------------------------------------------------------------------------------------------------------------------------------------------------------------------|-----------------------------------------------------------------------------------------------------------------------------------------------------------------------------------------------------------------------------------------------------------------------------------------------------------|-----------------------------------------------------------------------------------------------------------------------------------------------------------------------------------------------------------------------------------------------------------------------------------------------------------|-----------------------------------------------------------------------------------------------------------------------------------------------------------------------------------------------|---------------------------------------------------------------------------------------------------------------------------------------------------------------------------|----------------------------------------------------------------------------------------------|--------------------------------------------------------------------------------------------------------------------------------------------------|
| Cancer incidence rate in both sexes (per 100,000) | 131.5                                                                                                                                                                                                                                                                                                                                                                                                                                                                                                                     | 160.6                                                                                                                                                                                                                                                                                                                            | 130.4                                                                                                                                                                                                                                                                                                                                                                                        | 216.7                                                                                                                                                                                                                                                                                                     | 175.7                                                                                                                                                                                                                                                                                                     | 100.1                                                                                                                                                                                         | 187.1                                                                                                                                                                     | 91.1                                                                                         | 94                                                                                                                                               |
| Cancer mortality rate in both sexes (per 100,000) | 68.9                                                                                                                                                                                                                                                                                                                                                                                                                                                                                                                      | 85                                                                                                                                                                                                                                                                                                                               | 96.4                                                                                                                                                                                                                                                                                                                                                                                         | 115.1                                                                                                                                                                                                                                                                                                     | 103                                                                                                                                                                                                                                                                                                       | 72.1                                                                                                                                                                                          | 117.9                                                                                                                                                                     | 53.9                                                                                         | 64.5                                                                                                                                             |
| Common cancers in women (%) (*)                   | Breast (24.8%), Cervical (16.9%), Colorectal (4.8%), Stomach (4.3%), Liver (4%)                                                                                                                                                                                                                                                                                                                                                                                                                                           | Breast (23.4%), Cervical (12.6%), Colorectal (8.2%), Stomach (6%), Thyroid (5.8%)                                                                                                                                                                                                                                                | Cervical (17.9%), Stomach (15.6%), Liver (10.5%), Endometrial (10.4%), Breast (8.1%)                                                                                                                                                                                                                                                                                                         | Breast (32.2%), Colorectal (10.5%), Cervix (8.2%), Lung (5.9%), Ovary (3.8%)                                                                                                                                                                                                                              | Breast (20.4%), Colorectal (9.6%), Gallbladder (8.0%), Cervix (7.2%), Lung (6.7%)                                                                                                                                                                                                                         | Breast (42.2%), Cervix (21.8%), Liver (6.4%), Colorectal (3.1%), Non-Hodgkin lymphoma (2.7%)                                                                                                  | Breast (24.5%), Cervix (19.3%), Lung (6.4%), Colorectal (5.4%), Esophagus (4%)                                                                                            | Breast (30%), Colorectal (9.5%), Thyroid (9.1%), Non-Hodgkin lymphoma (5.7%), Uterine (4.7%) | Breast (27%), Cervical (22.9%), Colorectal (5.1%), Ovary (5%), Oral (4.3%)                                                                       |
| Common cancers in men (%) (**)                    | Prostate (21.4%), Lung (8.3%), Colorectal (7.1%), Stomach (6.3%), Leukemia (5.1%)                                                                                                                                                                                                                                                                                                                                                                                                                                         | Prostate (27.8%), Stomach (10.7%), Lung (8.8%), Colorectal (7.7%), Non-Hodgkin lymphoma (5.4%)                                                                                                                                                                                                                                   | Stomach (19.9%), Prostate (17.7%), Liver (13.2%), Lung (6.7%), Leukemia (5.7%)                                                                                                                                                                                                                                                                                                               | Prostate (20.4%), Lung (14%), Colorectal (13.2%), Bladder (4.9%), Kidney (4.8%)                                                                                                                                                                                                                           | Prostate (27.9%), Stomach (12%), Lung (8.8%), Colorectal (8.2%), Kidney (3.9%)                                                                                                                                                                                                                            | Prostrate (32%), Liver (21.1%), Non-Hodgkin lymphoma (6.2%), Colorectal (5.8%), Pancreas (2.5%)                                                                                               | Prostate (26.6%), Lung (12.6%), Colorectal (6.7%), Esophagus (6.1%), Kaposi sarcoma (4.5%)                                                                                | Colorectal (14.2%), Non-Hodgkin lymphoma (8.7%), Prostate (8.5%), Lung (7.4%), Liver (6.2%)  | Oral (11.3%), Lung (11.3%), Stomach (9.1%), Colorectal (7.7%), Other pharynx (6.6%)                                                              |
| Cancer treatments providers and coverage          | <ul style="list-style-type: none"> <li>- Social security as Mexican Social Security Institute (IMSS) or Institute of Safety and Social Services for Government Workers (ISSSTE) provides free service and treatment</li> <li>- Seguro popular provides treatment to uninsured people to specific cancers as breast, testis, prostate, colorectal, cervical, ovarian, lymphoma and all childhood neoplasms</li> <li>- Private hospitals and private providers, private health insurance or out-of-pocket costs.</li> </ul> | <ul style="list-style-type: none"> <li>- All services for cancer care are available in the Colombian health care system</li> <li>- Health insurance institution (EPS) provides cancer treatment through high-Cost Diseases Office</li> <li>- The majority of cancer treatments are part of the obligatory health plan</li> </ul> | <ul style="list-style-type: none"> <li>- Guatemalan Social Security Institute (IGSS) provides free service and treatment.</li> <li>- Large public hospitals also provides some service and cancer treatments.</li> <li>- National Cancer Institute provide cancer treatments</li> <li>- Private hospitals and private providers, private health insurance or out-of-pocket costs.</li> </ul> | <ul style="list-style-type: none"> <li>- Cancer institutes, university hospitals and specialized public hospitals provide services covered by the national public health system.</li> <li>- Private hospitals provide cancer treatments covered by private insurance or out-of-pocket payment.</li> </ul> | <ul style="list-style-type: none"> <li>- Cancer institutes, university hospitals and specialized public hospitals provide services covered by the national public health system.</li> <li>- Private hospitals provide cancer treatments covered by private insurance or out-of-pocket payment.</li> </ul> | <ul style="list-style-type: none"> <li>- A few large teaching hospitals provide care and Private hospitals and private providers, private health insurance or out-of-pocket costs.</li> </ul> | <ul style="list-style-type: none"> <li>- 80% State funded</li> <li>- 20% Private funded with varying levels of access to treatment depending on option funded.</li> </ul> | <ul style="list-style-type: none"> <li>- Many government and private hospitals.</li> </ul>   | <ul style="list-style-type: none"> <li>- Regional Cancer centers; University hospitals; Public Hospitals; Specialized cancer centers.</li> </ul> |
| National cancer registry                          | Under development                                                                                                                                                                                                                                                                                                                                                                                                                                                                                                         | Fully implemented                                                                                                                                                                                                                                                                                                                | Under development                                                                                                                                                                                                                                                                                                                                                                            | Fully implemented                                                                                                                                                                                                                                                                                         | Fully implemented                                                                                                                                                                                                                                                                                         | Under Development                                                                                                                                                                             | Fully implemented                                                                                                                                                         | Fully implemented                                                                            | Fully implemented                                                                                                                                |

(\*) The most common cancers in young women and girls that may require aggressive gonadotoxic anticancer treatments and necessitate prior fertility preservation measures are breast, cervix, leukemia, lymphoma, central nervous system, renal, and bone cancers.

(\*\*) The most common cancers in young men and boys that may require aggressive gonadotoxic anticancer treatments and necessitate prior fertility preservation measures are testicular cancer, leukemia and lymphoma and central nervous system cancers.

*American Society of Clinical Oncology recommendations on fertility preservation in cancer patients*



**Table 3: Fertility Treatments**

|                                                                           |                            | Mexico                          | Colombia                        | Guatemala                       | Argentina                                                              | Chile                                        | Nigeria                                  | South Africa                                                           | Saudi Arabia                             | India                                   |
|---------------------------------------------------------------------------|----------------------------|---------------------------------|---------------------------------|---------------------------------|------------------------------------------------------------------------|----------------------------------------------|------------------------------------------|------------------------------------------------------------------------|------------------------------------------|-----------------------------------------|
| Who can receive fertility treatments?                                     |                            | Unregulated, provider dependent | Unregulated, provider dependent | Unregulated, provider dependent | Married/Stable union heterosexual and homosexual couples, Single women | Unregulated, provider dependent              | Heterosexual partners                    | Married/Stable union heterosexual and homosexual couples, Single women | Married heterosexual couples only        | Married heterosexual couples            |
| Assisted Reproductive Techniques (ART)                                    | IUI                        | Available                       | Available                       | Available                       | Available                                                              | Available                                    | Available                                | Available                                                              | Available                                | Available                               |
|                                                                           | IVF                        | Available                       | Available                       | Available                       | Available                                                              | Available                                    | Available                                | Available                                                              | Available                                | Available                               |
|                                                                           | ICSI                       | Available                       | Available                       | Available                       | Available                                                              | Available                                    | Available                                | Available                                                              | Available                                | Available                               |
|                                                                           | PGD                        | Available                       | Available                       | Available                       | Available                                                              | Available                                    | Available                                | Available                                                              | Available                                | Available                               |
|                                                                           | Sex Selection              | Not available                   | Not available                   | Not available                   | Available only for medical reasons                                     | Available                                    | Available                                | Available                                                              | Available                                | Prohibited                              |
| Cryo-preservation                                                         | Embryo Freezing            | Available                       | Available                       | Available                       | Available                                                              | Available                                    | Available                                | Available                                                              | Available                                | Available                               |
|                                                                           | Egg Freezing               | Available                       | Available                       | Available                       | Available                                                              | Available                                    | Available                                | Available                                                              | Available                                | Available                               |
|                                                                           | Social egg freezing        | Not available                   | Not available                   | Not available                   | Available                                                              | Available                                    | Available                                | Available                                                              | Not Available                            | Available                               |
|                                                                           | Ovarian tissue freezing    | Not available                   | Available                       | Not available                   | Recently Available                                                     | Available                                    | Not available                            | Not available                                                          | Not Available                            | Available                               |
|                                                                           | Sperm freezing             | Available                       | Available                       | Available                       | Available                                                              | Available                                    | Available                                | Available                                                              | Available                                | Available                               |
|                                                                           | Testicular tissue freezing | Available                       | Available                       | Not available                   | Not Available                                                          | Available                                    | Available                                | Not available                                                          | Available                                | Available                               |
| Third Party Reproduction                                                  | Sperm donation             | Available but unregulated       | Available but unregulated       | Available                       | Allowed                                                                | Available but unregulated                    | Available but unregulated                | Allowed                                                                | Prohibited                               | Available                               |
|                                                                           | Egg donation               | Available but unregulated       | Available but unregulated       | Available                       | Allowed                                                                | Available but unregulated                    | Available but unregulated                | Allowed                                                                | Prohibited                               | Available                               |
|                                                                           | Embryo donation            | Available but unregulated       | Available but unregulated       | Not available                   | Allowed                                                                | Available but unregulated                    | Available but unregulated                | Allowed                                                                | Prohibited                               | Available                               |
|                                                                           | Surrogacy                  | Available in one state          | Available but unregulated       | Available                       | Not Allowed (only under litigation)                                    | Not available but not illegal                | Available but unregulated                | Allowed                                                                | Prohibited                               | Available for Indians only              |
| Adoption                                                                  |                            | Allowed                         | Allowed                         | Allowed                         | Allowed                                                                | Allowed                                      | Allowed                                  | Allowed                                                                | Available                                | Available                               |
| Insurance coverage for fertility treatments                               |                            | No                              | No                              | No                              | Yes                                                                    | Only in some University and public hospitals | No                                       | Less than 1%                                                           | No                                       | No                                      |
| Fertility treatments providers: Private centers (*) Public hospitals (**) |                            | 100% Private centers            | 100% Private centers            | 100% Private centers            | 90 % Private centers 10 % Public Hospitals                             | 85% Private centers 15% Public hospitals     | 80% Private centers 20% Public hospitals | 85% Private centers 15% Public hospitals                               | 70% Private centers 30% Public hospitals | 99% Private centers 1% Public hospitals |
| Average cost of a single cycle of IVF/ICSI (USD)                          |                            | 6000                            | 7120                            | 7500                            | 2000 - 3500                                                            | 5000 - 10000                                 | 2000 - 5500                              | 2500 - 6000                                                            | 4000 - 7000                              | 1500 - 3000                             |
| National registry                                                         |                            | Not available                   | Not available                   | Not available                   | Available                                                              | Available                                    | Not available                            | Available                                                              | Not available                            | Available                               |

IUI: Intrauterine Insemination, IVF: In Vitro Fertilization, ICSI: Intracytoplasmic Sperm Injection, PGD: Preimplantation Genetic Diagnosis.

(\*) Private centers include private hospitals and clinics.

(\*\*) Public hospitals include University and governmental hospitals.

**Table 4: Fertility Preservation Treatments**

|                                                                                              |                            | Mexico                          | Colombia                        | Guatemala                       | Argentina                                                                                | Chile                                        | Nigeria                                     | South Africa                                                                             | Saudi Arabia                                | India                                              |
|----------------------------------------------------------------------------------------------|----------------------------|---------------------------------|---------------------------------|---------------------------------|------------------------------------------------------------------------------------------|----------------------------------------------|---------------------------------------------|------------------------------------------------------------------------------------------|---------------------------------------------|----------------------------------------------------|
| Who can receive fertility preservation treatments?                                           |                            | Unregulated, provider dependent | Unregulated, provider dependent | Unregulated, provider dependent | Married/Stable union heterosexual and homosexual couples, Single women, cancer patients. | Unregulated, provider dependent              | Married /Unmarried                          | Married/Stable union heterosexual and homosexual couples, Single women, cancer patients. | Married heterosexual couples only           | Married/unmarried couples/persons, cancer patients |
| Cryo-preservation                                                                            | Embryo Freezing            | Available                       | Available                       | Available                       | Available                                                                                | Available                                    | Available                                   | available                                                                                | Available                                   | Available                                          |
|                                                                                              | Egg Freezing               | Available                       | Available                       | Available                       | Available                                                                                | Available                                    | Available                                   | available                                                                                | Available                                   | Available                                          |
|                                                                                              | Social egg freezing        | Not available                   | Not available                   | Not available                   | Available                                                                                | Available                                    | Available                                   | available                                                                                | Not Available                               | Available                                          |
|                                                                                              | Ovarian tissue freezing    | Not available                   | Available                       | Not available                   | Recently Available                                                                       | Available                                    | Not available                               | Not available                                                                            | Not Available                               | Available                                          |
|                                                                                              | Sperm freezing             | Available                       | Available                       | Available                       | Available                                                                                | Available                                    | Available                                   | available                                                                                | Available                                   | Available                                          |
|                                                                                              | Testicular tissue freezing | Available                       | Available                       | Not available                   | Not Available                                                                            | Available                                    | Available                                   | Not available                                                                            | Available                                   | Available                                          |
| Insurance coverage for fertility preservation treatments                                     |                            | No                              | No                              | No                              | Only oncology preservation                                                               | Only for sperm freezing in testicular cancer | No                                          | Limited to one medical scheme                                                            | No                                          | No                                                 |
| Fertility preservation treatments providers:<br>Private centers (*)<br>Public hospitals (**) |                            | 100% Private centers            | 100% Private centers            | 100% Private centers            | 90 % Private centers<br>10 % Public Hospitals                                            | 85% Private centers<br>15% Public hospitals  | 80% Private centers<br>20% Public hospitals | 85% Private centers<br>15% Public hospitals                                              | 70% Private centers<br>30% Public hospitals | 99% Private centers<br>1% Public hospitals         |
| Average cost of a single frozen cycle of IVF/ICSI (USD)                                      |                            | 10000                           | 11400                           | 13500                           | 2500 - 4000                                                                              | 5000 - 10000                                 | 1500                                        | 1700 - 5500                                                                              | 800 - 1300                                  | 1500 - 3000                                        |
| National registry                                                                            |                            | Not available                   | Not available                   | Not available                   | Available                                                                                | Not available                                | Not available                               | Available                                                                                | Not available                               | Not available                                      |

(\*) Private centers include private hospitals and clinics.

(\*\*) Public hospitals include University and governmental hospitals.

**Table 5: Barriers to Oncofertility**

|                                                               | Mexico                    | Colombia    | Guatemala   | Argentina                               | Chile        | Nigeria     | South Africa | Saudi Arabia | India                    |
|---------------------------------------------------------------|---------------------------|-------------|-------------|-----------------------------------------|--------------|-------------|--------------|--------------|--------------------------|
| <b>1- Medical Barriers</b>                                    |                           |             |             |                                         |              |             |              |              |                          |
| Lack of awareness among oncologists, gynecologists & patients | Yes                       | Yes         | Yes         | Yes                                     | Yes          | Yes         | Yes          | Yes          | Yes                      |
| Lack of advances in early diagnosis and treatment of cancer   | Yes                       | Yes         | Yes         | No                                      | Yes          | Yes         | No           | Yes          | Yes                      |
| Lack of inter-institutional communications                    | Yes                       | Yes         | Yes         | Yes                                     | Yes          | Yes         | Yes          | Yes          | Yes                      |
| Lack of referrals from oncologists                            | Yes                       | Yes         | Yes         | Yes                                     | Yes          | Yes         | Yes          | Yes          | Yes                      |
| Lack of some fertility preservation options                   | No                        | No          | Yes         | No                                      | No           | Yes         | Yes          | Yes          | Yes                      |
| Lack of oncofertility specialists                             | Yes                       | Yes         | Yes         | Yes                                     | Yes          | Yes         | No           | Yes          | Yes                      |
|                                                               |                           |             |             |                                         |              |             |              |              |                          |
| <b>2- Economic Barriers</b>                                   |                           |             |             |                                         |              |             |              |              |                          |
| Lack of health insurance coverage for fertility services      | Yes                       | Yes         | Yes         | No                                      | Yes          | Yes         | Yes          | Yes          | Yes                      |
| Most of fertility services are provided in private centers    | Yes                       | Yes         | Yes         | Yes                                     | Yes          | Yes         | Yes          | Yes          | Yes                      |
| Lack of institution and research fund                         | Yes                       | Yes         | Yes         | Yes                                     | Yes          | Yes         | No           | Yes          | With exceptions          |
|                                                               |                           |             |             |                                         |              |             |              |              |                          |
| <b>3- Social Barriers</b>                                     |                           |             |             |                                         |              |             |              |              |                          |
| Sperm donation                                                | Accepted                  | Accepted    | Accepted    | Accepted                                | Accepted     | Accepted    | Accepted     | Not accepted | Accepted                 |
| Egg donation                                                  | Accepted                  | Accepted    | Accepted    | Accepted                                | Accepted     | Accepted    | Accepted     | Not accepted | Accepted                 |
| Embryo donation                                               | Accepted                  | Accepted    | Accepted    | Accepted                                | Accepted     | Accepted    | Accepted     | Not accepted | Accepted                 |
| Surrogacy                                                     | Accepted                  | Accepted    | Accepted    | Not accepted                            | Not accepted | Accepted    | Accepted     | Not accepted | Accepted                 |
| Adoption                                                      | Accepted                  | Accepted    | Accepted    | Accepted                                | Accepted     | Accepted    | Accepted     | Accepted     | Accepted                 |
|                                                               |                           |             |             |                                         |              |             |              |              |                          |
| <b>4- Legal Barriers</b>                                      |                           |             |             |                                         |              |             |              |              |                          |
| Sperm donation                                                | Allowed                   | Unregulated | Unregulated | Accepted                                | Unregulated  | Unregulated | Allowed      | Prohibited   | Allowed                  |
| Egg donation                                                  | Allowed                   | Unregulated | Unregulated | Accepted                                | Unregulated  | Unregulated | Allowed      | Prohibited   | Allowed                  |
| Embryo donation                                               | Allowed                   | Unregulated | Unregulated | Accepted                                | Unregulated  | Unregulated | Allowed      | Prohibited   | Allowed                  |
| Surrogacy                                                     | Allowed only in one state | Unregulated | Unregulated | Working with legislators to be approved | Unregulated  | Unregulated | Allowed      | Prohibited   | Allowed only for Indians |
| Adoption                                                      | Allowed                   | Allowed     | Allowed     | Accepted                                | Allowed      | Allowed     | Allowed      | Allowed      | Allowed                  |



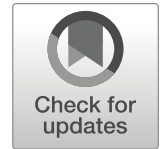

# Installing oncofertility programs for common cancers in limited resource settings (Repro-Can-OPEN Study): An extrapolation during the global crisis of Coronavirus (COVID-19) pandemic

M. Salama<sup>1</sup> · L. Ataman-Millhouse<sup>1</sup> · M. Braham<sup>2</sup> · K. Berjeb<sup>2</sup> · M. Khrouf<sup>3</sup> · J. K. Rodrigues<sup>4</sup> · F. M. Reis<sup>4</sup> · T. Cury-Silva<sup>4</sup> · F. Sánchez<sup>5</sup> · S. Romero<sup>5</sup> · J. Smitz<sup>5</sup> · L. Vásquez<sup>6</sup> · M. Vega<sup>7</sup> · F. Sobral<sup>8</sup> · G. Terrado<sup>8</sup> · M. G. Lombardi<sup>8</sup> · A. Scarella<sup>9</sup> · M. T. Bourlon<sup>10</sup> · H. Verduzco-Aguirre<sup>10</sup> · A. M. Sánchez<sup>11</sup> · S. K. Adiga<sup>12</sup> · P. Tholeti<sup>12</sup> · K. S. Udupa<sup>13</sup> · N. Mahajan<sup>14</sup> · M. Patil<sup>15</sup> · R. Dalvi<sup>16</sup> · C. Venter<sup>17</sup> · G. Demetriou<sup>18</sup> · J. Geel<sup>19</sup> · R. Quintana<sup>20</sup> · G. Rodriguez<sup>20</sup> · T. Quintana<sup>20</sup> · L. Viale<sup>20</sup> · M. Fraguiglia<sup>20</sup> · M. Coirini<sup>21</sup> · Y. A. Remolina-Bonilla<sup>22</sup> · J. A. R. Noguera<sup>22</sup> · J. C. Velásquez<sup>22</sup> · A. Suarez<sup>22</sup> · G. D. Arango<sup>23</sup> · J. I. D. Pineda<sup>24</sup> · M. D. C. Aldecoa<sup>24</sup> · M. Javed<sup>25</sup> · H. Al Sufyan<sup>25</sup> · N. Daniels<sup>26</sup> · B. C. Oranye<sup>26</sup> · A. A. Ogunmokun<sup>26</sup> · K. I. Onwuzurigbo<sup>27</sup> · C. J. Okereke<sup>27</sup> · T. C. Whesu<sup>27</sup> · T. K. Woodruff<sup>1</sup>

Received: 1 May 2020 / Accepted: 10 May 2020  
© Springer Science+Business Media, LLC, part of Springer Nature 2020

## Abstract

**Purpose** The state of limited resource settings that Coronavirus (COVID-19) pandemic has created globally should be taken seriously into account especially in healthcare sector. In oncofertility, patients should receive their fertility preservation treatments urgently even in limited resource settings before initiation of anticancer therapy. Therefore, it is very crucial to learn more about oncofertility practice in limited resource settings such as in developing countries that suffer often from shortage of healthcare services provided to young patients with cancer.

**Methods** As an extrapolation during the global crisis of COVID-19 pandemic, we surveyed oncofertility centers from 14 developing countries (Egypt, Tunisia, Brazil, Peru, Panama, Mexico, Colombia, Guatemala, Argentina, Chile, Nigeria, South Africa, Saudi Arabia, and India). Survey questionnaire included questions on the availability and degree of utilization of fertility preservation options in case of childhood cancer, breast cancer, and blood cancer.

**Results** All surveyed centers responded to all questions. Responses and their calculated oncofertility scores showed different domestic standards for oncofertility practice in case of childhood cancer, breast cancer, and blood cancer in the developing countries under limited resource settings.

**Conclusions** Medical practice in limited resource settings has become a critical topic especially after the global crisis of COVID-19 pandemic. Understanding the resources necessary to provide oncofertility treatments is important until the current COVID-19 pandemic resolves. Lessons learned will be valuable to future potential worldwide disruptions due to infectious diseases or other global crises.

**Keywords** oncofertility · cancer · limited resource settings · COVID-19 · pandemic

## Introduction

Recent advances in cancer diagnosis and treatment over the past four decades have led to a significant increase of the overall survival rates in most cases of young women and men with cancer [1]. Unfortunately, several malignancies occur at young age and necessitate aggressive anticancer therapies including alkylating chemotherapy and ionizing radiation that may lead to gonadotoxicity and future fertility loss as

✉ M. Salama  
eaims\_gm@yahoo.com

✉ T. K. Woodruff  
tkw@northwestern.edu

Extended author information available on the last page of the article

devastating side effects. Accordingly, the topic of how to prevent or mitigate the chemotherapy- and radiotherapy-induced gonadotoxicity, and subsequent fertility loss, has gained a growing importance [2–5]. Oncofertility is an interdisciplinary field at the intersection of oncology and reproductive medicine that aims to provide effective fertility options to young cancer patients through several fertility preservation and restoration strategies. The term “oncofertility” was coined in 2006 by the Oncofertility Consortium, Feinberg School of Medicine, Northwestern University, Chicago, IL, USA [6–8].

According to the most recent international guidelines, several established, debatable and experimental oncofertility options can be offered to young female and male patients with cancer in order to preserve and restore their fertility (Table 1) [9–11]. Seldom, if ever, little data is available about oncofertility practice in limited resource settings. The recent Coronavirus (COVID-19) pandemic has resulted in a rapid cascade of unprecedented events around the globe including lockdowns and significant shortage of resources and services. The state of limited resource settings that COVID-19 pandemic has created globally should be taken seriously into account especially in healthcare sector. Thousands of patients worldwide have been affected due to cancelation or postponement of their medical treatments. In oncofertility, patients should receive their fertility preservation treatments urgently even in limited resource settings before initiation of anticancer therapy. Therefore, it is very crucial to learn more about oncofertility practice in limited resource settings such as in developing countries that suffer often from shortage of healthcare services provided to young patients with cancer.

Over the past few years, the Oncofertility Consortium has studied oncofertility practice in developing countries. The Oncofertility Consortium had generated a survey within its Oncofertility Professional Engagement Network (OPEN) [12] (Fig 1) to explore the barriers and opportunities associated with oncofertility practice in 14 developing countries in Africa, Latin America and Asia, including Egypt, Tunisia, Nigeria, South Africa, Brazil, Argentina, Chile, Peru, Panama, Mexico, Colombia, Guatemala, Saudi Arabia, and India. The survey questions were grouped into six categories: country profile, cancer care, fertility treatments, fertility preservation treatments, barriers to oncofertility, and opportunities of oncofertility. Responses from the surveyed centers in the 14 developing countries were collected, reviewed, and discussed. The results of the survey were published in two articles in the *Journal of Global Oncology*, one of the American Society of

Clinical Oncology (ASCO) official journals [13, 14]. The surveyed centers from the 14 developing countries continue to experience common challenges such as shortage of healthcare services provided to young patients with cancer, lack of awareness among providers and patients, cultural and religious constraints, lack of insurance coverage, high out-of-pocket costs for patients, and lack of funding to support oncofertility programs. Despite these barriers, many opportunities exist and create a great potential for the future.

The limited resources in developing countries make their proper allocation of utmost necessity particularly in a complex medical field as oncofertility. As a practical approach, the Oncofertility Consortium has designed this new study: the Repro-Can-OPEN: Reproduction and Cancer in the Oncofertility Professional Engagement Network, in order to help bridge the gap between the international oncofertility programs and domestic standards in developing countries. Technically, Repro-Can-OPEN study aims to help developing countries install specific oncofertility programs for common cancers such as childhood cancer, breast cancer, and blood cancer according to their contemporary challenges and opportunities.

## Methods

As a kickoff, the Oncofertility Consortium sent the Repro-Can-OPEN study questionnaire via email to the previously surveyed centers and experts in the 14

**Table 1** Fertility preservation options for patients undergoing gonadotoxic anticancer therapy

| Oncofertility options | Female Patients                                                                                                                                                                                                                | Male Patients                                                                                                                                                                                        |
|-----------------------|--------------------------------------------------------------------------------------------------------------------------------------------------------------------------------------------------------------------------------|------------------------------------------------------------------------------------------------------------------------------------------------------------------------------------------------------|
| <b>Established</b>    | <ul style="list-style-type: none"> <li>. Embryo freezing</li> <li>. Egg freezing</li> <li>. Ovarian tissue freezing and autotransplantation</li> </ul>                                                                         | <ul style="list-style-type: none"> <li>. Sperm freezing</li> </ul>                                                                                                                                   |
| <b>Debatable</b>      | <ul style="list-style-type: none"> <li>. GnRH analogs and hormonal suppression</li> <li>. Oophoropexy</li> <li>. Gonadal shielding</li> <li>. Fractionated chemotherapy and radiotherapy</li> </ul>                            | <ul style="list-style-type: none"> <li>. GnRH analogs and hormonal suppression</li> <li>. Gonadal shielding</li> <li>. Fractionated chemotherapy and radiotherapy</li> </ul>                         |
| <b>Experimental</b>   | <ul style="list-style-type: none"> <li>. In vitro maturation of oocytes and vitrification</li> <li>. Artificial ovary</li> <li>. Stem cells</li> <li>. Neoadjuvant cytoprotective pharmacotherapy</li> <li>. Others</li> </ul> | <ul style="list-style-type: none"> <li>. Testicular tissue freezing and autotransplantation</li> <li>. Stem cells</li> <li>. Neoadjuvant cytoprotective pharmacotherapy</li> <li>. Others</li> </ul> |

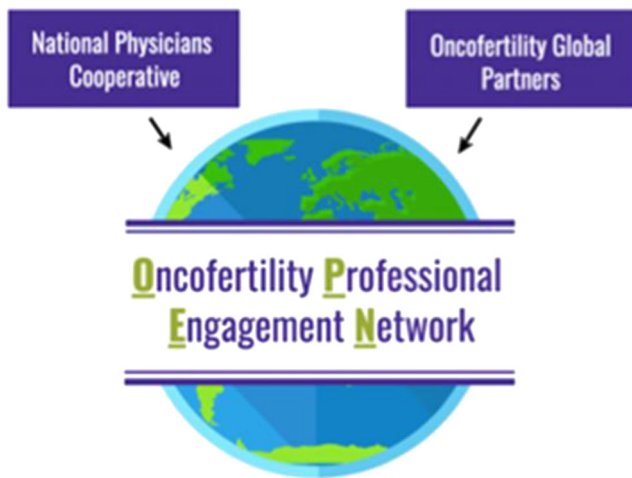

**Fig. 1** Merger of American and global networks in to one unified network, the Oncofertility Professional Engagement Network (OPEN).

developing countries (Egypt, Tunisia, Nigeria, South Africa, Brazil, Argentina, Chile, Peru, Panama, Mexico, Colombia, Guatemala, Saudi Arabia, and India) to be proposed for childhood cancer, breast cancer and blood cancer. The Repro-Can-OPEN study questionnaire included questions on the availability of fertility preservation options provided to young female and male patients with cancer and whether these options are always, commonly, occasionally or rarely used (Tables 2, 3, 4 and 5). The responses for childhood cancer, breast cancer, and blood cancer from the surveyed centers and experts in the 14 developing countries were collected, reviewed, and analyzed.

To analyze the collected data, our coauthor Dr. Salama from Northwestern University has developed a new scoring system called ‘Oncofertility Score’. The ‘Oncofertility Score, is a new diagnostic tool to measure the availability and utilization of an oncofertility option for cancer patients in a treating center, country, or group of countries. It is also a prognostic tool to follow up the development of oncofertility options and strategies provided to cancer patients over time. Oncofertility Score is calculated as a percentile ratio between the actual and maximal points of utilization that an oncofertility option might have (Table 2 & Fig 2). When a fertility preservation option is available and always used for cancer patients, it is given (Yes +++) that weighs 100 actual points (25 points per each +). When a fertility preservation option is available and commonly used for cancer patients, it is given (Yes ++) that weighs 75 actual points (25 points per each +). When a fertility preservation option is available but occasionally used for cancer patients, it is given (Yes ++) that weighs 50 actual points (25 points per each +). When a fertility preservation option is available but

only used in research settings for cancer patients, it is given (Yes +) that weighs 25 actual points (25 points per each +). When a fertility preservation option is not available, it is given (No) that weighs 0 actual points. The maximal points of utilization that an oncofertility option might have is 100 when it is available and always used for cancer patients and is given (Yes +++++), (25 points per each +).

In this study with 14 developing countries, the Oncofertility Score is calculated as a percentile ratio between the total actual points and the total maximal points of utilization that an oncofertility option might have. The total actual points for an oncofertility option equal the sum of actual points for this option in all 14 countries. The total maximal points for an oncofertility option equal 100 points multiplied by 14 (number of countries in this study) resulting in 1400 points (Tables 3, 4, 5).

## Results

All surveyed centers and experts from the 14 developing countries (Egypt, Tunisia, Nigeria, South Africa, Brazil, Argentina, Chile, Peru, Panama, Mexico, Colombia, Guatemala, Saudi Arabia, and India) responded to all questions. Responses for childhood cancer, breast cancer, and blood cancer and their calculated oncofertility scores are listed in Tables 3, 4, 5.

**The oncofertility scores (%) for options provided to children with cancer in the 14 developing countries were as following;** gonadal shielding in case of irradiation (67.85%), fractionation of chemo- and radiotherapy (60.71%), oophoropexy in case of pelvic irradiation (46.42%), GnRH analogs in case of old children (9-14 year) (33.92%), oocyte in vitro maturation (IVM) (28.57%), ovarian tissue freezing (25%), testicular tissue freezing (17.85%), neoadjuvant cytoprotective pharmacotherapy (3.57%), artificial ovary (1.78%), stem cells (1.78%) (Table 3 & Fig 3).

**The oncofertility scores (%) for options provided to female patients with breast cancer in the 14 developing countries were as following;** gonadal shielding in case of irradiation (62.5%), fractionation of chemo- and radiotherapy (62.5%), egg freezing (58.92%), embryo freezing (55.35%), GnRH analogs (55.35%), IVF/ICSI of frozen oocytes (55.35%), frozen embryo transfer (53.57%), ovarian tissue freezing (28.57%), oocyte in vitro maturation (IVM) (28.57%), autotransplantation of frozen ovarian tissue (19.64%), stem cells (3.57%), artificial ovary (1.78%), neoadjuvant cytoprotective pharmacotherapy (1.78%) (Table 4 & Fig 4).

**Table 2** Oncofertility Score calculation

| Availability and Utilization of an oncofertility option | Available and always used for cancer patients | Available and commonly used for cancer patients | Available but occasionally used for cancer patients | Available but only used in research settings for cancer patients | Not available |
|---------------------------------------------------------|-----------------------------------------------|-------------------------------------------------|-----------------------------------------------------|------------------------------------------------------------------|---------------|
| Scale Symbol                                            | ++++                                          | +++                                             | ++                                                  | +                                                                | -             |
| Actual Points (AP)<br>(25 points per +)                 | 100                                           | 75                                              | 50                                                  | 25                                                               | 0             |
| Maximal Points (MP)<br>(100 points per +++)             | 100                                           | 100                                             | 100                                                 | 100                                                              | 100           |
| Oncofertility Score = AP/MP (%)                         | 100%                                          | 75%                                             | 50%                                                 | 25%                                                              | 0%            |

**The oncofertility scores (%) for options provided to patients with blood cancer in the 14 developing countries were as following;** gonadal shielding in case of irradiation (67.85%), sperm freezing (66.07%), fractionation of chemo- and radiotherapy (60.71%), egg freezing (58.92%), embryo freezing (55.35%), oophoropexy in case of pelvic irradiation (46.42%), GnRH analogs (33.92%), oocyte in vitro maturation (IVM) (28.57%), ovarian tissue freezing (25%), testicular tissue freezing (17.85%), neoadjuvant cytoprotective pharmacotherapy (3.57%), artificial ovary (1.78%), stem cells (1.78%) Fig 5.

## Discussion

Limited resource settings are not exclusive for developing countries as many other countries around the globe may relatively experience similar limiting conditions as happened recently with COVID-19 pandemic. Therefore, medical practice including oncofertility in limited resource settings has become a critical topic that every nation should take into account. Recently, a joint statement from the Oncofertility Consortium and the Alliance For Fertility Preservation on fertility preservation for patients receiving gonadotoxic therapies during the COVID-19 pandemic has been announced [15]. The announcement came after the recommendations from the American Society for Reproductive Medicine (ASRM's COVID-19 Task Force) was distributed [16], which suggests new IVF cycles should not be initiated at this time. Importantly, this pause in services does not apply to urgent fertility preservation for patients receiving gonadotoxic therapies, but in practicality, loss of general IVF may impact practices' standard operations. While clinicians and leaders in the fertility preservation community remain committed to handling these urgent cases, there are evolving geographic, legal, and practical constraints that may cause interruptions or delays. Understanding the resources necessary to provide this required medical option is important until the current

pandemic resolves. Lessons learned will be valuable to future potential worldwide disruptions due to infectious diseases or other global crises.

Our Repro-Can-OPEN study showed different oncofertility domestic standards in developing countries under limited resource settings regarding childhood cancer, breast cancer, and blood cancer. Therefore, we will try here to use the results of our study to tailor and install plausible oncofertility programs for common cancers in limited resource settings in developing countries according to their contemporary challenges and opportunities (Table 6).

Immediately after cancer diagnosis, we recommend early referrals of patients to oncofertility specialists in order to check the anticancer therapy plan and determine the related risk of gonadotoxicity and fertility loss. If the risk of gonadotoxicity and fertility loss is greater than 50%, an effective oncofertility strategy should be offered before, during and after anticancer therapy, after obtaining the informed consent from the patient or the legal guardians of a child. After complete cure from cancer, a new assessment of reproductive functions should be performed. If anticancer therapy induced gonadal dysfunction persists, fertility restoration may be achieved by using stored gametes or gonadal tissue [17–23].

## Installing oncofertility programs for childhood cancer in 14 developing countries:

The common forms of childhood cancers that may require aggressive gonadotoxic anticancer therapy and hence necessitate prior fertility preservation measures are leukemia, central nervous system cancers, and lymphoma. **Before initiation of anticancer therapy**, freezing of prepubertal gonadal tissues (ovarian or testicular tissue) should be encouraged and attempted when



**Table 3** Oncofertility Options and Scores (%) for Childhood Cancer in 14 developing countries

| Childhood Cancer                                                             | 1        | 2        | 3        | 4            | 5        | 6         | 7        | 8        | 9        | 10       | 11       | 12        | 13           | 14       | Total Actual Points | Oncofertility Score (%) |
|------------------------------------------------------------------------------|----------|----------|----------|--------------|----------|-----------|----------|----------|----------|----------|----------|-----------|--------------|----------|---------------------|-------------------------|
| Developing Countries                                                         | Egypt    | Tunisia  | Nigeria  | South Africa | Brazil   | Argentina | Chile    | Peru     | Panama   | Mexico   | Colombia | Guatemala | Saudi Arabia | India    |                     |                         |
| Available fertility preservation options for girls with cancer               |          |          |          |              |          |           |          |          |          |          |          |           |              |          |                     |                         |
| - Ovarian tissue freezing                                                    | No       | Yes (++) | No       | No           | Yes (+)  | Yes (+)   | Yes (+)  | Yes (++) | Yes (++) | Yes (++) | Yes (+)  | No        | No           | Yes (++) | 350                 | 25                      |
| - Oophorectomy in case of pelvic irradiation                                 | Yes (++) | Yes (++) | No       | Yes (++)     | Yes (++) | Yes (++)  | Yes (++) | Yes (++) | Yes (++) | Yes (++) | Yes (++) | No        | Yes (++)     | Yes (++) | 680                 | 46.42                   |
| - Oocyte in vitro maturation (IVM)                                           | No       | No       | Yes (+)  | No           | Yes (++) | Yes (+)   | Yes (+)  | Yes (++) | Yes (++) | No       | Yes (++) | Yes (++)  | Yes (++)     | Yes (+)  | 400                 | 28.57                   |
| - Artificial ovary                                                           | No       | No       | No       | No           | Yes (+)  | No        | No       | No       | No       | No       | No       | Yes (++)  | No           | No       | 25                  | 1.78                    |
| Available fertility preservation options for boys with cancer                |          |          |          |              |          |           |          |          |          |          |          |           |              |          |                     |                         |
| - Testicular tissue freezing                                                 | No       | No       | Yes (++) | No           | Yes (+)  | No        | No       | No       | No       | Yes (++) | No       | Yes (++)  | Yes (++)     | Yes (+)  | 250                 | 17.85                   |
| Available fertility preservation options for both girls and boys with cancer |          |          |          |              |          |           |          |          |          |          |          |           |              |          |                     |                         |
| - Gonadotropin releasing hormone analogs in case of child (<14 year)         | No       | Yes (++) | No       | Yes (++)     | Yes (++) | Yes (+)   | Yes (++) | No       | Yes (++) | Yes (++) | No       | Yes (++)  | Yes (++)     | Yes (+)  | 475                 | 33.92                   |
| - Somatostatin analogs in case of irradiation                                | Yes (++) | Yes (++) | Yes (++) | Yes (++)     | Yes (++) | Yes (++)  | Yes (++) | Yes (++) | Yes (++) | Yes (++) | Yes (++) | Yes (++)  | Yes (++)     | Yes (++) | 980                 | 67.85                   |
| - Neoadjuvant chemotherapy and additional endocrine therapy                  | Yes (++) | Yes (++) | Yes (++) | Yes (++)     | Yes (++) | Yes (++)  | Yes (++) | Yes (++) | Yes (++) | Yes (++) | No       | Yes (++)  | Yes (++)     | Yes (++) | 850                 | 60.71                   |
| - Neoadjuvant cytoprotective pharmacotherapy                                 | No       | No       | No       | No           | No       | No        | No       | No       | No       | No       | No       | No        | Yes (++)     | No       | 50                  | 3.57                    |
| - Stem cells                                                                 | No       | No       | No       | No           | No       | No        | No       | No       | No       | No       | No       | No        | Yes (+)      | No       | 25                  | 1.78                    |

(++++): Available and always used for cancer patients, (+++): Available and commonly used for cancer patients, (++) Available but occasionally for cancer patients, (+) Available but only used in research setting for cancer patients, (No) Not available.

**Table 4** Oncofertility Options and Scores (%) for Breast Cancer in 14 developing countries

| Breast Cancer                                                        | 1        | 2        | 3        | 4            | 5        | 6         | 7        | 8        | 9        | 10       | 11       | 12        | 13           | 14       | Total Actual Points | Oncofertility Score (%) |
|----------------------------------------------------------------------|----------|----------|----------|--------------|----------|-----------|----------|----------|----------|----------|----------|-----------|--------------|----------|---------------------|-------------------------|
| Developing Countries                                                 | Egypt    | Tunisia  | Nigeria  | South Africa | Brazil   | Argentina | Chile    | Peru     | Panama   | Mexico   | Colombia | Guatemala | Saudi Arabia | India    |                     |                         |
| Available fertility preservation options before anticancer treatment |          |          |          |              |          |           |          |          |          |          |          |           |              |          |                     |                         |
| - Embryo freezing                                                    | Yes (++) | Yes (++) | Yes (++) | Yes (++)     | Yes (++) | Yes (++)  | Yes (++) | Yes (++) | Yes (++) | Yes (++) | Yes (++) | No        | Yes (++)     | Yes (++) | 775                 | 55.35                   |
| - Egg freezing                                                       | Yes (++) | Yes (++) | Yes (++) | Yes (++)     | Yes (++) | Yes (++)  | Yes (++) | Yes (++) | Yes (++) | Yes (++) | Yes (++) | Yes (++)  | Yes (++)     | Yes (++) | 825                 | 58.92                   |
| - Ovarian tissue freezing                                            | No       | Yes (++) | No       | Yes (++)     | Yes (+)  | Yes (+)   | Yes (+)  | Yes (++) | Yes (++) | Yes (++) | Yes (+)  | No        | No           | Yes (++) | 400                 | 28.57                   |
| - Oocyte in vitro maturation (IVM)                                   | No       | No       | Yes (+)  | No           | Yes (+)  | Yes (+)   | Yes (+)  | Yes (++)  | Yes (+)      | Yes (+)  | 400                 | 28.57                   |
| - Artificial ovary                                                   | No       | No       | No       | No           | Yes (+)  | No        | No       | No       | No       | No       | No       | No        | No           | No       | 25                  | 1.78                    |
| Available fertility preservation options during anticancer treatment |          |          |          |              |          |           |          |          |          |          |          |           |              |          |                     |                         |
| - GnRH analogs                                                       | Yes (++) | Yes (++) | No       | Yes (++)     | Yes (++) | Yes (++)  | Yes (++) | Yes (++) | Yes (++) | Yes (++) | Yes (++) | Yes (++)  | Yes (++)     | Yes (++) | 775                 | 55.35                   |
| - Gonadal shielding in case of irradiation                           | Yes (++) | Yes (++) | Yes (++) | Yes (++)     | Yes (++) | Yes (++)  | Yes (++) | Yes (++) | Yes (++) | Yes (++) | Yes (++) | Yes (++)  | Yes (++)     | Yes (++) | 875                 | 62.5                    |
| - Fractionation of chemo- and radiotherapy                           | Yes (++) | Yes (++) | Yes (++) | Yes (++)     | Yes (++) | Yes (++)  | Yes (++) | Yes (++) | Yes (++) | Yes (++) | Yes (++) | Yes (++)  | Yes (++)     | Yes (++) | 875                 | 62.5                    |
| - Neoadjuvant cytoprotective pharmacotherapy                         | No       | No       | No       | No           | Yes (+)  | No        | No       | No       | No       | No       | No       | No        | Yes (+)      | No       | 25                  | 1.78                    |
| Available fertility restoration options after anticancer treatment   |          |          |          |              |          |           |          |          |          |          |          |           |              |          |                     |                         |
| - Frozen embryo transfer                                             | Yes (++) | Yes (++) | Yes (++) | Yes (++)     | Yes (++) | Yes (++)  | Yes (++) | Yes (++) | Yes (++) | Yes (++) | Yes (++) | Yes (++)  | Yes (++)     | Yes (++) | 750                 | 53.57                   |
| - IVF/ICSI of frozen oocytes                                         | Yes (++) | Yes (++) | Yes (++) | Yes (++)     | Yes (++) | Yes (++)  | Yes (++) | Yes (++) | Yes (++) | Yes (++) | Yes (++) | Yes (++)  | Yes (++)     | Yes (++) | 775                 | 55.35                   |
| - Autologous transplantation of frozen ovarian tissue                | No       | Yes (++) | No       | No           | Yes (+)  | Yes (+)   | Yes (+)  | No       | Yes (++) | Yes (++) | No       | No        | No           | Yes (++) | 275                 | 19.64                   |
| - Stem cells                                                         | No       | No       | No       | No           | Yes (+)  | No        | No       | No       | No       | No       | No       | No        | Yes (+)      | No       | 50                  | 3.57                    |

(++++): Available and always used for cancer patients, (+++): Available and commonly used for cancer patients, (++) Available but occasionally for cancer patients, (+) Available but only used in research setting for cancer patients, (No) Not available.

**Table 5** Oncofertility Options and Scores (%) for Blood Cancer in 14 developing countries

| Blood Cancer                                                               | 1        | 2         | 3        | 4            | 5         | 6         | 7         | 8         | 9         | 10        | 11        | 12        | 13           | 14        | Total Actual Points | Oncofertility Score (%) |
|----------------------------------------------------------------------------|----------|-----------|----------|--------------|-----------|-----------|-----------|-----------|-----------|-----------|-----------|-----------|--------------|-----------|---------------------|-------------------------|
| Developing Countries                                                       | Egypt    | Tunisia   | Nigeria  | South Africa | Brazil    | Argentina | Chile     | Peru      | Panama    | Mexico    | Colombia  | Guatemala | Saudi Arabia | India     |                     |                         |
| Available fertility preservation options for female patients               |          |           |          |              |           |           |           |           |           |           |           |           |              |           |                     |                         |
| - Embryo Freezing                                                          | Yes (++) | Yes (+++) | Yes (++) | Yes (+++)    | Yes (+++) | Yes (+++) | Yes (++)  | Yes (+++) | Yes (++)  | Yes (++)  | Yes (++)  | No        | Yes (++)     | Yes (++)  | 775                 | 55.35                   |
| - Egg freezing                                                             | Yes (++) | Yes (+++) | Yes (++) | Yes (+++)    | Yes (+++) | Yes (+++) | Yes (++)  | Yes (+++) | Yes (++)     | Yes (++)  | 825                 | 58.92                   |
| - Ovarian tissue freezing                                                  | No       | Yes (++)  | No       | No           | Yes (++)  | No        | No           | Yes (++)  | 350                 | 25                      |
| - Oophorectomy in case of pelvic irradiation                               | Yes (++) | Yes (+++) | No       | Yes (++)     | Yes (++)  | Yes (++)  | Yes (++)  | Yes (++)  | Yes (++)  | Yes (++)  | Yes (++)  | No        | Yes (++)     | Yes (++)  | 650                 | 46.42                   |
| - Oocyte in vitro maturation (IVM)                                         | No       | No        | Yes (++) | No           | Yes (++)  | No        | Yes (++)  | Yes (++)  | Yes (++)     | Yes (++)  | 400                 | 28.57                   |
| - Artificial ovary                                                         | No       | No        | No       | No           | Yes (++)  | No           | No        | 25                  | 1.78                    |
| Available fertility preservation options for male patients                 |          |           |          |              |           |           |           |           |           |           |           |           |              |           |                     |                         |
| - Sperm Freezing                                                           | Yes (++) | Yes (+++) | Yes (++) | Yes (++)     | Yes (++)  | Yes (+++) | Yes (+++) | Yes (++)  | Yes (+++) | Yes (+++) | Yes (+++) | Yes (++)  | Yes (+++)    | Yes (+++) | 925                 | 66.07                   |
| - Testicular tissue freezing                                               | No       | No        | Yes (++) | No           | Yes (++)  | No        | No        | No        | No        | Yes (++)  | No        | Yes (++)  | Yes (++)     | Yes (++)  | 250                 | 17.85                   |
| Available fertility preservation options for both female and male patients |          |           |          |              |           |           |           |           |           |           |           |           |              |           |                     |                         |
| - GnRH analogs                                                             | No       | Yes (++)  | No       | Yes (++)     | Yes (++)  | Yes (++)  | Yes (++)  | No        | Yes (++)  | Yes (++)  | No        | Yes (++)  | Yes (++)     | Yes (++)  | 475                 | 33.92                   |
| - Gonadal shielding in case of irradiation                                 | Yes (++) | Yes (++)  | Yes (++) | Yes (++)     | Yes (++)  | Yes (++)  | Yes (++)  | Yes (++)  | Yes (++)  | Yes (++)  | Yes (++)  | Yes (++)  | Yes (++)     | Yes (++)  | 950                 | 67.85                   |
| - Fractionation of chemo- and radiotherapy                                 | Yes (++) | Yes (++)  | Yes (++) | Yes (++)     | Yes (++)  | Yes (++)  | Yes (++)  | Yes (++)  | Yes (++)  | Yes (++)  | No        | Yes (++)  | Yes (++)     | Yes (++)  | 850                 | 60.71                   |
| - Neoadjuvant cytoprotective pharmacotherapy                               | No       | No        | No       | No           | No        | No        | No        | No        | No        | No        | No        | No        | Yes (++)     | No        | 50                  | 3.57                    |
| - Stem cells                                                               | No       | No        | No       | No           | No        | No        | No        | No        | No        | No        | No        | No        | Yes (++)     | No        | 25                  | 1.78                    |

(+++), Available and always used for cancer patients, (++) Available and commonly used for cancer patients, (+) Available but occasionally for cancer patients, (0) Not available.

possible. In vitro maturation and vitrification of gametes (oocytes or spermatozoa) and artificial gonads technology (ovary or testis) are still challenging in children and cannot be relied upon as effective oncofertility options in limited resource settings. Oophorectomy before female pelvis irradiation should be attempted when possible. **During anticancer therapy**, gonadal shielding in case of irradiation and fractionation of chemo- and radiotherapy should be attempted in all cases. GnRH analogs in case of old children (9-14 year) could be attempted while neoadjuvant cytoprotective pharmacotherapy is still very experimental in animal models and not yet reliable as an effective oncofertility option. **After anticancer therapy**, and when the patient becomes an adult and wishes for having children, fertility restoration may be achieved by using stored gametes. Autotransplantation of gonadal tissue can be offered to restore fertility but it should be contraindicated in leukemia due to possible contamination of gonadal tissue with leukemic cells. Stem cells reproductive technology is still very experimental and not yet reliable as an effective oncofertility option (Table 6) [8–10, 16–22].

### Installing oncofertility programs for breast cancer in 14 developing countries:

Breast cancer is the most common cancer in women during their reproductive years. Breast cancer may require aggressive gonadotoxic anticancer therapy and hence necessitate prior fertility preservation measures. Women with BRCA1 or BRCA2 mutations carry significant higher risks to develop breast and ovarian cancers, and they should receive oncofertility care as well. **Before initiation of anticancer therapy**, freezing of embryos or eggs should be attempted in all cases using tamoxifen, letrozole or random-start protocol for controlled ovarian stimulation to avoid high estradiol levels. Freezing of ovarian tissue should be attempted when possible. In vitro maturation and vitrification of oocytes could be attempted however artificial ovary technology is still challenging and cannot be relied upon as an effective oncofertility option in limited resource settings. **During anticancer therapy**, GnRH analogs and fractionation of chemo- and radiotherapy should be attempted in all cases. Gonadal shielding might be needed in case of combined irradiation to ovaries. Neoadjuvant cytoprotective pharmacotherapy is still very experimental in animal models and not yet reliable as an effective oncofertility option. **After anticancer therapy**, fertility restoration may be achieved

**Fig. 2** Oncofertility Score calculation

$$\text{Oncofertility Score} = \frac{\text{Actual Points (AP) of utilization that an oncofertility option might have}}{\text{Maximal Points (MP) of utilization that an oncofertility option might have}} \%$$

by frozen embryo transfer, or in vitro fertilization of stored oocytes. Autotransplantation of ovarian tissue can be offered to restore fertility but it should be contraindicated in patients with BRCA mutations due to higher risks of developing ovarian cancer. Stem cells reproductive technology is still very experimental and not yet reliable as an effective oncofertility option (Table 6) [8–10, 16–22].

**Installing oncofertility programs for blood cancer in 14 developing countries:**

The common forms of blood cancers that occur during the reproductive age and may require immediate aggressive gonadotoxic anticancer therapy and hence necessitate prior fertility preservation measures are acute lymphocytic leukemia (ALL), acute myeloid leukemia (AML), Non-Hodgkin lymphoma (NHL), and Hodgkin lymphoma (HL). **Before initiation of anticancer therapy**, freezing of embryos or gametes (oocytes or spermatozoa) should be attempted in all cases. Freezing of gonadal tissues (ovarian or testicular tissue) should be attempted when possible. In vitro maturation

and vitrification of gametes could be attempted however artificial gonads technology is still challenging and cannot be relied upon as an effective oncofertility option in limited resource settings. Oophorectomy before female pelvis irradiation should be attempted when possible. **During anticancer therapy**, gonadal shielding in case of irradiation and fractionation of chemo- and radiotherapy should be attempted in all cases. GnRH analogs could be attempted while neoadjuvant cytoprotective pharmacotherapy is still very experimental in animal models and not yet reliable as an effective oncofertility option. **After anticancer therapy**, fertility restoration may be achieved by frozen embryo transfer, or in vitro fertilization of stored gametes. Autotransplantation of gonadal tissue can be offered to restore fertility but it should be contraindicated in leukemia due to possible contamination of gonadal tissue with leukemic cells. Stem cells reproductive technology is still very experimental and not yet reliable as an effective oncofertility option (Table 6) [8–10, 16–22].

After installation of these specific oncofertility programs for common cancers in the 14 developing countries, we encourage all partners to use ‘oncofertility score’ as a prognostic tool to follow up the development of the new oncofertility

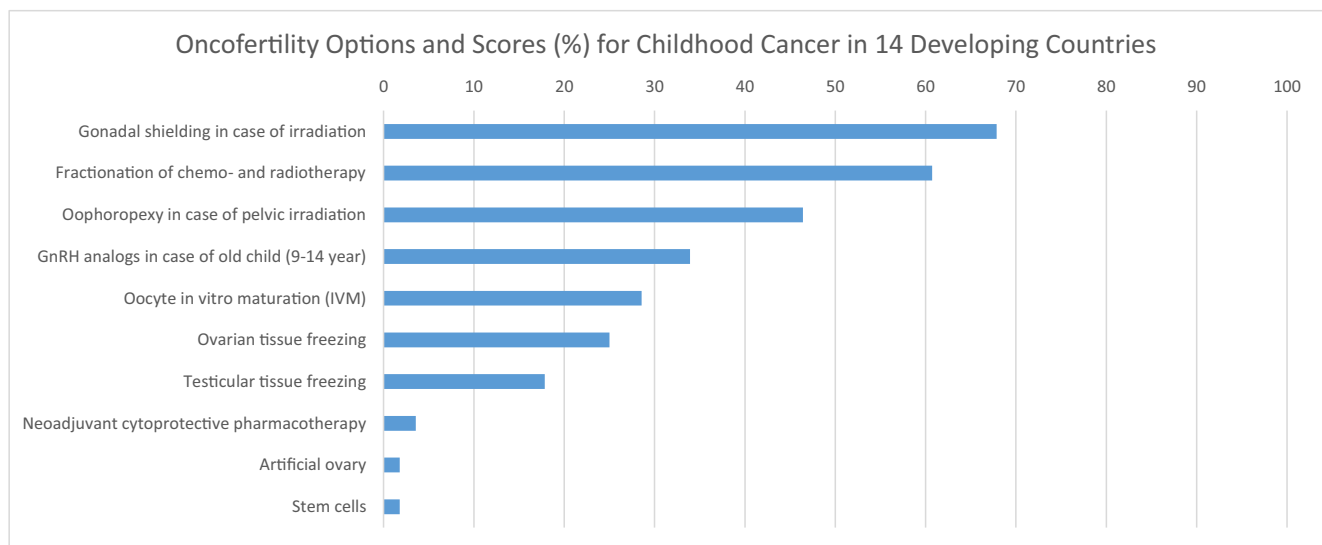

**Fig. 3** Oncofertility Options and Scores (%) for Childhood Cancer in 14 developing countries

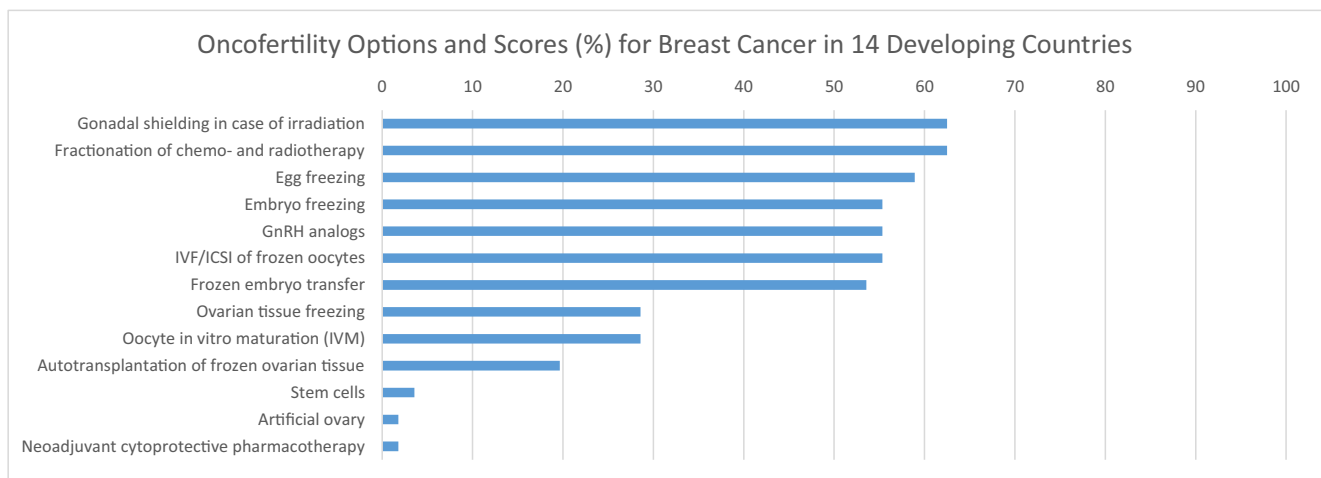

**Fig. 4** Oncofertility Options and Scores (%) for Breast Cancer in 14 developing countries

programs and options provided to cancer patients over time. If oncofertility options are rejected, contraindicated, infeasible, unsuccessful or unavailable, adoption and third-party reproduction (sperm, egg, and embryo donation and surrogacy) can be offered as family building alternatives when possible [5].

## Conclusion

Medical practice in limited resource settings has become a critical topic that every nation should take into account especially after the global crisis of COVID-19 pandemic. Our Repro-Can-OPEN study showed different oncofertility domestic standards in limited resource settings in developing countries

regarding childhood cancer, breast cancer, and blood cancer. Installation of specific oncofertility programs for common cancers such as childhood cancer, breast cancer, and blood cancer in developing countries according to their contemporary challenges and opportunities is highly recommended. Dissemination of this study results and recommendations will provide efficient oncofertility edification and modelling to pediatric, breast and hemato-oncologists in developing countries and help them offer the best care possible to their socio-economically disadvantaged patients. Meanwhile, the Oncofertility Consortium will continue to engage more stakeholders in developing countries to use the powerful networks in the United States and other developed countries to help build a sustainable oncofertility core competency worldwide.

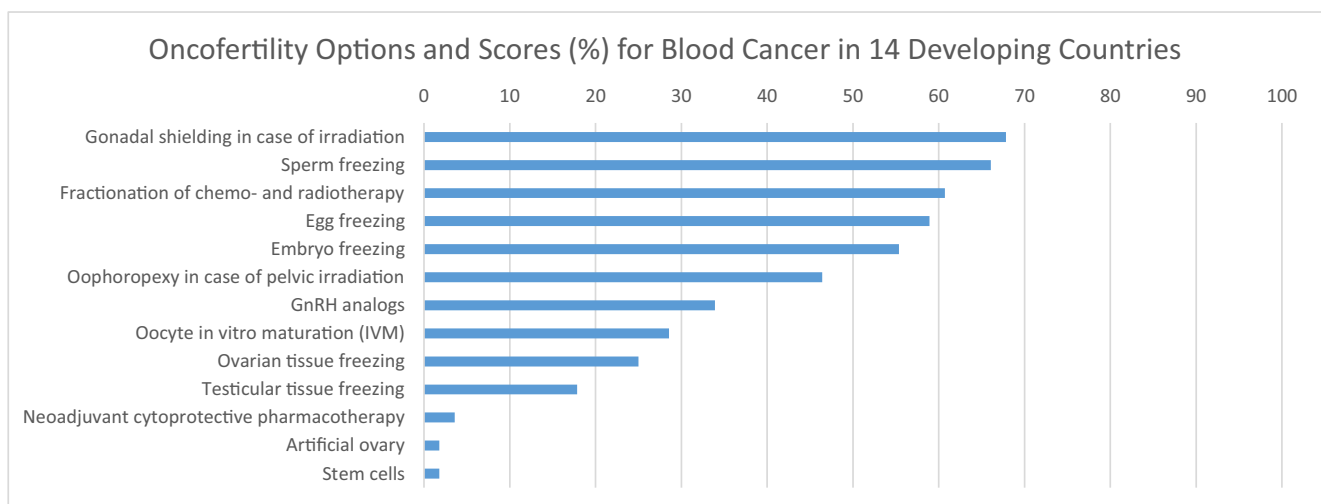

**Fig. 5** Oncofertility Options and Scores (%) for Blood Cancer in 14 developing countries

**Table 6** Plausible fertility preservation and restoration strategies for cancer patients in 14 developing countries

| Cancer Patients                                                                    | Before Anticancer therapy (Fertility Preservation)                                                                                                                                                                                                                                             | During Anticancer therapy (Fertility Preservation)                                                                                                                                                                                                          | After Anticancer therapy (Fertility Restoration)                                                                                                                                                                                                                      |
|------------------------------------------------------------------------------------|------------------------------------------------------------------------------------------------------------------------------------------------------------------------------------------------------------------------------------------------------------------------------------------------|-------------------------------------------------------------------------------------------------------------------------------------------------------------------------------------------------------------------------------------------------------------|-----------------------------------------------------------------------------------------------------------------------------------------------------------------------------------------------------------------------------------------------------------------------|
| <b>Childhood Cancer</b><br>Leukemias, central nervous system cancers, and lymphoma | <ul style="list-style-type: none"> <li>. Freezing of gonadal tissue</li> <li>. In vitro maturation and vitrification of gametes (not yet reliable in children)</li> <li>. Oophoropexy in case of female pelvic radiation</li> <li>. Artificial gonads technology (not yet reliable)</li> </ul> | <ul style="list-style-type: none"> <li>. Gonadal shielding</li> <li>. Fractionation of chemo- and radiotherapy</li> <li>. GnRH analogs in case of old child (9-14 year)</li> <li>. Neoadjuvant cytoprotective pharmacotherapy (not yet reliable)</li> </ul> | <ul style="list-style-type: none"> <li>. IVF/ICSI of frozen gametes</li> <li>. Autotransplantation of frozen gonadal tissue (contraindicated in leukemia)</li> <li>. Stem cells (not yet reliable)</li> </ul>                                                         |
| <b>Breast Cancer</b><br>Patients with or without BRCA mutations                    | <ul style="list-style-type: none"> <li>. Egg freezing</li> <li>. Embryo freezing</li> <li>. Ovarian tissue freezing</li> <li>. In vitro maturation (IVM) of oocytes and vitrification</li> <li>. Artificial ovary technology (not yet reliable)</li> </ul>                                     | <ul style="list-style-type: none"> <li>. GnRH analogs</li> <li>. Fractionation of chemo- and radiotherapy</li> <li>. Gonadal shielding</li> <li>. Neoadjuvant cytoprotective pharmacotherapy (not yet reliable)</li> </ul>                                  | <ul style="list-style-type: none"> <li>. Intrauterine transfer of frozen embryo</li> <li>. IVF/ICSI of frozen oocytes</li> <li>. Autotransplantation of frozen ovarian tissue (contraindicated in BRCA mutations)</li> <li>. Stem cells (not yet reliable)</li> </ul> |
| <b>Blood Cancer</b><br>Leukemia (ALL, AML), and Lymphoma (NHL, HL)                 | <ul style="list-style-type: none"> <li>. Freezing of gametes</li> <li>. Freezing of gonadal tissue</li> <li>. In vitro maturation and vitrification of gametes</li> <li>. Oophoropexy in case of female pelvic radiation</li> <li>. Artificial gonads technology (not yet reliable)</li> </ul> | <ul style="list-style-type: none"> <li>. GnRH analogs</li> <li>. Gonadal shielding</li> <li>. Fractionation of chemo- and radiotherapy</li> <li>. Neoadjuvant cytoprotective pharmacotherapy (not yet reliable)</li> </ul>                                  | <ul style="list-style-type: none"> <li>. Intrauterine transfer of frozen embryo</li> <li>. IVF/ICSI of frozen gametes</li> <li>. Autotransplantation of frozen gonadal tissue (contraindicated in leukemia)</li> <li>. Stem cells (not yet reliable)</li> </ul>       |

**References**

1. Siegel RL, Miller KD, Jemal A. Cancer statistics, 2018. *CA Cancer J Clin.* 2018;68(1):7–30.
2. Jeruss JS, Woodruff TK. Preservation of fertility in patients with cancer. *N Engl J Med.* 2009;360(9):902–11.
3. Ataman LM, Rodrigues JK, Marinho RM, Caetano JP, Chehin MB, Alves da Motta EL, et al. Creating a Global Community of Practice for Oncofertility. *J Glob Oncol.* 2016;2(2):83–96.
4. Rashedi A, de Roo SF, Ataman L, Edmonds ME, Silva AA, Scarella A, et al. A survey of fertility preservation options available to cancer patients around the globe. *J Glob Oncol.* 2018;4:1–16.
5. Rashedi A, de Roo SF, Ataman L, Edmonds ME, Silva AA, Scarella A, et al. A survey of third-party parenting options associated with fertility preservation available to patients with cancer around the globe. *J Glob Oncol.* 2018;4:1–7.
6. Woodruff TK. The emergence of a new interdisciplinary: oncofertility. *Cancer Treat Res.* 2007;138:3–11.
7. Woodruff TK. Oncofertility: a grand collaboration between reproductive medicine and oncology. *Reproduction.* 2015;150(3):S1–10.
8. Oncofertility Consortium - Northwestern University [Internet]. [cited 2020 1]. Available from <<http://oncofertility.northwestern.edu>>:
9. Practice Committee of the American Society for Reproductive Medicine (ASRM). Fertility preservation in patients undergoing gonadotoxic therapy or gonadectomy: a committee opinion. *Fertil Steril.* 2019;112(6):1022–33.
10. Oktay K, Harvey BE, Partridge AH, Quinn GP, Reinecke J, Taylor HS, et al. Fertility Preservation in Patients With Cancer: ASCO Clinical Practice Guideline Update. *J Clin Oncol.* 2018;36(19):1994–2001.
11. von Wolff M, Andersen CY, Woodruff TK, Nawroth F. FertiPROTEKT, Oncofertility Consortium and the Danish Fertility-Preservation Networks - What Can We Learn From Their Experiences? *Clin Med Insights Reprod Health.* 2019;13:1179558119845865.
12. Oncofertility Professional Engagement Network (OPEN) - Northwestern University [Internet]. [cited 2020 Apr 1]. Available from: <<http://oncofertility.northwestern.edu/oncofertility-professional-engagement-network>>
13. Salama M, Ataman L, Taha T, Azmy O, Khrouf M, Braham M, et al. Building Oncofertility Core Competency in Developing Countries: Experience from Egypt, Tunisia, Brazil, Peru, and Panama. *J Glob Oncol.* 2018;4:1–11.
14. Salama M, Ataman-Millhouse L, Sobral F, Terrado G, Scarella A, Bourlon MT, et al. Barriers and Opportunities of Oncofertility Practice in Nine Developing Countries and the Emerging Oncofertility Professional Engagement Network. *J Glob Oncol.* 2018;4:1–7.
15. Joint Statement from the Alliance for Fertility Preservation and the Oncofertility Consortium on Fertility Preservation for Patients Receiving Gonadotoxic Therapies During the COVID-19 Pandemic [Internet]. [cited 2020 Apr 1]. Available from: <<http://oncofertility.northwestern.edu/news/joint-statement-alliance-fertility-preservation-and-oncofertility-consortium-fertility>>
16. COVID-19 Task Force of the American Society for Reproductive Medicine (ASRM). [Internet]. [cited 2020 Apr 1]. Available from: <<https://www.asrm.org/news-and-publications/covid-19/statements/patient-management-and-clinical-recommendations-during-the-coronavirus-covid-19-pandemic/>>
17. Salama M, Isachenko V, Isachenko E, Rahimi G, Mallmann P. Updates in preserving reproductive potential of prepubertal girls with cancer: Systematic review. *Crit Rev Oncol Hematol.* 2016;103:10–21.
18. Salama M, Woodruff TK. New advances in ovarian autotransplantation to restore fertility in cancer patients. *Cancer Metastasis Rev.* 2015;34(4):807–22.

19. Salama M, Woodruff TK. Anticancer treatments and female fertility: clinical concerns and role of oncologists in oncofertility practice. *Expert Rev Anticancer Ther.* 2017;17(8):687–92.
20. Bourlon MT, Anazodo A, Woodruff TK, Segelov E. Oncofertility as a Universal Right and a Global Oncology Priority. *JCO Glob Oncol.* 2020;6:314–6.
21. Salama M, Woodruff TK. From bench to bedside: Current developments and future possibilities of artificial human ovary to restore fertility. *Acta Obstet Gynecol Scand.* 2019;98(5):659–64.
22. Salama M, Isachenko V, Isachenko E, Rahimi G, Mallmann P. Advances in fertility preservation of female patients with hematological malignancies. *Expert Rev Hematol.* 2017;10(11):951–60.
23. Salama M, Anazodo A, Woodruff TK. Preserving fertility in female patients with hematological malignancies: A multidisciplinary oncofertility approach. *Ann Oncol.* 2019;30(11):1760–75.

**Publisher's note** Springer Nature remains neutral with regard to jurisdictional claims in published maps and institutional affiliations.

## Affiliations

M. Salama<sup>1</sup>  · L. Ataman-Millhouse<sup>1</sup> · M. Braham<sup>2</sup> · K. Berjeb<sup>2</sup> · M. Khrouf<sup>3</sup> · J. K. Rodrigues<sup>4</sup> · F. M. Reis<sup>4</sup> · T. Cury- Silva<sup>4</sup> · F. Sánchez<sup>5</sup> · S. Romero<sup>5</sup> · J. Smitz<sup>5</sup> · L. Vásquez<sup>6</sup> · M. Vega<sup>7</sup> · F. Sobral<sup>7</sup> · G. Terrado<sup>8</sup> · M. G. Lombardi<sup>8</sup> · A. Scarella<sup>9</sup> · M. T. Bourlon<sup>10</sup> · H. Verduzco-Aguirre<sup>10</sup> · A. M. Sánchez<sup>11</sup> · S. K. Adiga<sup>12</sup> · P. Tholeti<sup>12</sup> · K. S. Udupa<sup>13</sup> · N. Mahajan<sup>14</sup> · M. Patil<sup>15</sup> · R. Dalvi<sup>16</sup> · C. Venter<sup>17</sup> · G. Demetriou<sup>18</sup> · J. Geel<sup>19</sup> · R. Quintana<sup>20</sup> · G. Rodriguez<sup>20</sup> · T. Quintana<sup>20</sup> · L. Viale<sup>20</sup> · M. Fraguglia<sup>20</sup> · M. Coirini<sup>21</sup> · Y. A. Remolina-Bonilla<sup>22</sup> · J. A. R. Noguera<sup>22</sup> · J. C. Velásquez<sup>22</sup> · A. Suarez<sup>22</sup> · G. D. Arango<sup>23</sup> · J. I. D. Pineda<sup>24</sup> · M. D. C. Aldecoa<sup>24</sup> · M. Javed<sup>25</sup> · H. Al Sufyan<sup>25</sup> · N. Daniels<sup>26</sup> · B. C. Oranye<sup>26</sup> · A. A. Ogunmokun<sup>26</sup> · K. I. Onwuzurigbo<sup>27</sup> · C. J. Okereke<sup>27</sup> · T. C. Whesu<sup>27</sup> · T. K. Woodruff<sup>1</sup>

L. Ataman-Millhouse  
lauren.ataman@northwestern.edu

M. Braham  
braham.marouen@gmail.com

K. Berjeb  
khadija.berjeb@yahoo.fr

M. Khrouf  
moh.khrouf@gmail.com

J. K. Rodrigues  
jhenifer.kr.pesquisa@gmail.com

F. M. Reis  
reis.ufmg@gmail.com

T. Cury- Silva  
taynaelcury@gmail.com

F. Sánchez  
Flor.sanchez.r@upch.pe

S. Romero  
Sergio.romero.1@upch.pe

J. Smitz  
Johan.smitz@upch.pe

L. Vásquez  
lilianavasq@gmail.com

M. Vega  
mgvega@outlook.com

F. Sobral  
fsobral@pregna.com.ar

G. Terrado  
gterrado@pregna.com.ar

M. G. Lombardi  
mglombardi@intramed.net

A. Scarella  
anibal.scarella@uv.cl

M. T. Bourlon  
maitebourlon@gmail.com

H. Verduzco-Aguirre  
haydee\_verduzco@hotmail.com

A. M. Sánchez  
adrianmtz81@hotmail.com

S. K. Adiga  
satish.adiga@manipal.edu

P. Tholeti  
prathima.t@manipal.edu

K. S. Udupa  
Udupa.karthik@manipal.edu

N. Mahajan  
dr.nalinimahajan@gmail.com

M. Patil  
drmadhuripatil59@gmail.com

R. Dalvi  
rashmidalvi5@gmail.com

C. Venter  
chrisv@vitalab.com

G. Demetriou  
georgiademetriou@hotmail.com

J. Geel  
Jennifer.geel@wits.ac.za

R. Quintana  
ramiroquintana@hotmail.com

G. Rodriguez  
gabriela.m.rodriguez@hotmail.com

T. Quintana  
Tquinta@hotmail.com

L. Viale  
Viale.luz@gmail.com

M. Fraguglia  
landisofia@gmail.com

M. Coirini  
mdcoirini@yahoo.com.ar

Y. A. Remolina-Bonilla  
yaremolinab@gmail.com

J. A. R. Noguera  
andrearussinoguera@gmail.com

J. C. Velásquez  
jevelasquez.2000@gmail.com

A. Suarez  
asuarez@cancer.gov.co

G. D. Arango  
gdapalau@yahoo.es

J. I. D. Pineda  
jennifer.dom@gmail.com

M. D. C. Aldecoa  
mdcastroaldecoa@gmail.com

M. Javed  
murid.javed@thuriah.com.sa

H. Al Sufyan  
hamadsufyan@yahoo.com

N. Daniels  
nonsod@yahoo.com

B. C. Oranye  
ben.oranye@gmail.com

A. A. Ogunmokun  
gbiteogunmokun@yahoo.com

K. I. Onwuzurigbo  
kingeki@yahoo.com

C. J. Okereke  
okerekedubem@yahoo.com

T. C. Whesu  
toyin.whesu@gmail.com

<sup>1</sup> Oncofertility Consortium, Feinberg School of Medicine, Northwestern University, Chicago, Illinois, USA

<sup>2</sup> Aziza Othmana Hospital of Tunis, Tunis, Tunisia

<sup>3</sup> FERTILLA, Clinique la Rose, Tunis, Tunisia

<sup>4</sup> Universidade Federal de Minas Gerais, Belo Horizonte, Minas Gerais, Brazil

<sup>5</sup> Laboratorio de Biología Reproductiva y Preservación de la Fertilidad, Laboratorios de Investigación y Desarrollo, Universidad Peruana Cayetano Heredia, Lima, Peru

<sup>6</sup> Unidad de Oncología Pediátrica, Hospital Edgardo Rebagliati Martins, Lima, Peru

<sup>7</sup> Panama Fertility, Sistema Nacional de Investigadores, Panama City, Panama

<sup>8</sup> Pregna Medicina Reproductiva, Buenos Aires, Argentina

<sup>9</sup> Centro de Reproduccion Humana, Facultad de Medicina, Universidad de Valparaiso, Valparaiso, Chile

<sup>10</sup> Instituto Nacional de Ciencias Médicas y Nutrición Salvador Zubirán, Mexico City, Mexico

<sup>11</sup> Instituto Nacional de Perinatología Isidro Espinoza de los Reyes, Mexico City, Mexico

<sup>12</sup> Fertility Preservation Centre, Department of Clinical Embryology, Kasturba Medical College, Manipal Academy of Higher Education, Manipal, India

<sup>13</sup> Department of Medical Oncology, Kasturba Medical College, Manipal Academy of Higher Education, Manipal, India

<sup>14</sup> Mother and Child Hospital, New Delhi, India

<sup>15</sup> Dr. Patil's Fertility and Endoscopy Clinic, Bangalore, India

<sup>16</sup> Hospital Institute of Medical Sciences & SRCC children's Hospital, Mumbai, India

<sup>17</sup> Vitalab Fertility Centre, Johannesburg, South Africa

<sup>18</sup> Department Medical Oncology, University of Witwatersrand, Johannesburg, South Africa

<sup>19</sup> Charlotte Maxeke Johannesburg Academic Hospital, Johannesburg, South Africa

<sup>20</sup> Procreate, Buenos Aires, Argentina

<sup>21</sup> Hospital de Niños Victor J. Vilela. Rosario, Santa Fe, Argentina

<sup>22</sup> Instituto Nacional de Cancerología, Bogota, Colombia

<sup>23</sup> FERTIVIDA Fertility Center, Bogota, Colombia

<sup>24</sup> Instituto Guatemalteco de Seguridad Social (IGSS), Guatemala City, Guatemala

<sup>25</sup> Thuriah Medical Center, Riyadh, Kingdom of Saudi Arabia

<sup>26</sup> The Oncology and Fertility Centres of Ekocorp Plc, Eko Hospitals, Lagos, Nigeria

<sup>27</sup> Kingswill Specialist Hospital, Lagos, Nigeria

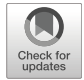

# Installing oncofertility programs for common cancers in optimum resource settings (Repro-Can-OPEN Study Part II): a committee opinion

Practice Committee of the Oncofertility Consortium<sup>1</sup>

Received: 8 November 2020 / Accepted: 9 November 2020  
© Springer Science+Business Media, LLC, part of Springer Nature 2021

## Abstract

**Purpose** The main objective of Repro-Can-OPEN Study Part 2 is to learn more about oncofertility practices in optimum resource settings to provide a roadmap to establish oncofertility best practice models.

**Methods** As an extrapolation for oncofertility best practice models in optimum resource settings, we surveyed 25 leading and well-resourced oncofertility centers and institutions from the USA, Europe, Australia, and Japan. The survey included questions on the availability and degree of utilization of fertility preservation options in case of childhood cancer, breast cancer, and blood cancer.

**Results** All surveyed centers responded to all questions. Responses and their calculated oncofertility scores showed three major characteristics of oncofertility practice in optimum resource settings: (1) strong utilization of sperm freezing, egg freezing, embryo freezing, ovarian tissue freezing, gonadal shielding, and fractionation of chemo- and radiotherapy; (2) promising utilization of GnRH analogs, oophoropexy, testicular tissue freezing, and oocyte in vitro maturation (IVM); and (3) rare utilization of neoadjuvant cytoprotective pharmacotherapy, artificial ovary, in vitro spermatogenesis, and stem cell reproductive technology as they are still in preclinical or early clinical research settings. Proper technical and ethical concerns should be considered when offering advanced and experimental oncofertility options to patients.

**Conclusions** Our Repro-Can-OPEN Study Part 2 proposed installing specific oncofertility programs for common cancers in optimum resource settings as an extrapolation for best practice models. This will provide efficient oncofertility education and modeling to oncofertility teams and related healthcare providers around the globe and help them offer the best care possible to their patients.

**Keywords** Oncofertility · Cancer · Optimum resource settings · Best practice · Childhood cancer · Breast cancer · Leukemia · Lymphoma

## Introduction

Several malignancies occur at a young age and may necessitate aggressive anticancer therapies including alkylating chemotherapy and ionizing radiation that could lead to gonadotoxicity and subsequent fertility loss as a devastating side effect. According to the most recent international guide-

lines of the American Society of Clinical Oncology (ASCO) and the American Society for Reproductive Medicine (ASRM), several established, debatable, and experimental oncofertility options can be offered to young female and male patients with cancer to preserve and restore fertility [1, 2]. Established oncofertility options include sperm freezing, embryo freezing, egg freezing, and recently ovarian tissue freezing and autotransplantation. Debatable oncofertility options include GnRH analogs and hormonal suppression, oophoropexy, gonadal shielding, and fractionation of chemotherapy and radiotherapy. Experimental oncofertility options include oocytes in vitro maturation (IVM), artificial ovary, testicular tissue freezing and autotransplantation, in vitro spermatogenesis, neoadjuvant cytoprotective pharmacotherapy, and stem cell reproductive technology.

---

Mahmoud Salama  
mahmoud.salama@northwestern.edu; eaims\_gm@yahoo.com

---

Teresa K. Woodruff  
tkw@northwestern.edu; TeresaWoodruff1989@alum.northwestern.edu

<sup>1</sup> The Oncofertility Consortium, Feinberg School of Medicine, Northwestern University, Chicago, IL, USA



However, such oncofertility international guidelines face several challenges in practice. Over the past years, the Oncofertility Consortium has studied oncofertility practice in many countries within its Oncofertility Professional Engagement Network (OPEN). Our previous studies identified a variety of standards in oncofertility practice around the globe due to limited resource settings, shortage of reproductive care services provided to young patients with cancer, lack of awareness among providers and patients, cultural and religious constraints, lack of insurance coverage, high out-of-pocket costs for patients, and lack of funding to support oncofertility programs [3–9]. Despite these challenges, many opportunities exist and create a significant potential for the future including improved cancer survival rates and improved success rates of many oncofertility options as well as emergence of new promising technologies. Therefore as a practical approach, the Oncofertility Consortium recommends installation of specific oncofertility programs for common cancers such as childhood, breast, and blood cancers according to the contemporary challenges and opportunities. This practical approach will provide efficient oncofertility edification and modeling to oncofertility teams and related healthcare providers around the globe and help them offer the best care possible to their patients. To carry out this practical approach, the Oncofertility Consortium has designed its new **Repro-Can-OPEN Studies (Reproduction and Cancer in the Oncofertility Professional Engagement Network)**.

Recently in our **Repro-Can-OPEN Study Part 1** published at *Journal of Assisted Reproduction and Genetics (JARG)* [10], we proposed installation of specific oncofertility programs for common cancers in limited resource settings amidst a current global crisis of the COVID-19 pandemic as well as in 14 developing countries from Africa, Asia, and Latin America. As a further step to reflect the actual wide spectrum of oncofertility practice around the globe and to help provide plausible oncofertility best practice models, we propose here in our **Repro-Can-OPEN Study Part 2** installation of specific oncofertility programs for common cancers in optimum resource settings. Our **Repro-Can-OPEN Study Part 2** is based on the practical experience of 25 leading and well-resourced oncofertility centers and institutions from the USA, Europe, Australia, and Japan.

## Methods

The Oncofertility Consortium sent the **Repro-Can-OPEN Study Part 2** questionnaire via email to 25 leading and well-resourced oncofertility centers and institutions from the USA, Europe, Australia, and Japan (Table 1 and Fig. 1) to be proposed for childhood cancer, breast cancer, and blood cancer. The **Repro-Can-OPEN Study Part 2** questionnaire included

questions on the availability of fertility preservation options provided to young female and male patients with cancer and whether these options are always, commonly, occasionally, or rarely used. The responses for childhood cancer, breast cancer, and blood cancer from the surveyed centers were collected, reviewed, and analyzed.

To analyze the collected data, our coauthor Dr. Salama from Northwestern University developed the new scoring system “oncofertility score”. As previously described [10], the oncofertility score is a new diagnostic tool to measure the availability and utilization of oncofertility options for cancer patients in a treating center, country, or group of centers or countries. It is also a prognostic tool to follow up on the development of oncofertility options and strategies provided to cancer patients over time. The oncofertility score is calculated as a percentile ratio between the actual and maximal points of utilization that an oncofertility option might have (Table 2 and Fig. 2). When a fertility preservation option is available and always used for cancer patients, it is given (Yes +++) that weighs 100 actual points (25 points per each +). When a fertility preservation option is available and commonly used for cancer patients, it is given (Yes ++) that weighs 75 actual points (25 points per each +). When a fertility preservation option is available but occasionally used for cancer patients, it is given (Yes +) that weighs 50 actual points (25 points per each +). When a fertility preservation option is available but rarely used or only used in research settings for cancer patients, it is given (Yes) that weighs 25 actual points (25 points per each +). When a fertility preservation option is not available, it is given (No) that weighs 0 actual points. When the fertility preservation option is not available to cancer patients because it is still in the preclinical research stage, it is marked with (No\*). The maximal point of utilization that an oncofertility option might have is 100 when it is available and always used for cancer patients and is given (Yes +++) (25 points per each +).

In this study of 25 surveyed centers, the oncofertility score is calculated as a percentile ratio between the total actual points and the total maximal points of utilization that an oncofertility option might have. The total actual points for an oncofertility option equal the sum of actual points for this option in all 25 surveyed centers. The total maximal points for an oncofertility option equal 100 points multiplied by 25 (number of surveyed centers in this study) resulting in 2500 points.

## Results

All 25 surveyed centers responded to all questions. Each surveyed center has the same serial number in all tables (Tables 1,

**Table 1** Surveyed oncofertility centers

| N Surveyed oncofertility centers |                                                                                                                                                                                                                                                     |
|----------------------------------|-----------------------------------------------------------------------------------------------------------------------------------------------------------------------------------------------------------------------------------------------------|
| 1                                | Oncofertility Consortium, Feinberg School of Medicine, Northwestern University, Chicago, IL 60611, USA.<br>Ann & Robert H. Lurie Children's Hospital of Chicago, 225 East Chicago Ave, Box 63, Chicago IL, 60611, USA.                              |
| 2                                | Yale Fertility Center and Yale Fertility Preservation program, 200 West Campus Dr., Orange, CT 06477, USA.                                                                                                                                          |
| 3                                | Karolinska Institutet, Department of Oncology-Pathology and Karolinska University Hospital, Department of Reproductive Medicine, Division of Gynecology and Reproduction, SE-14186, Stockholm, Sweden.                                              |
| 4                                | Department of Obstetrics and Gynecology, St. Marianna University School of Medicine, 2-16-1, Sugao, Miyamae-ku, Kawasaki, Kanagawa, Japan.                                                                                                          |
| 5                                | Department of Medical Oncology, UOC Clinica di Oncologia Medica, IRCCS Ospedale Policlinico San Martino, Genova, Italy.<br>Department of Internal Medicine and Medical Specialties (DiMI), School of Medicine, University of Genova, Genova, Italy. |
| 6                                | Fertility Preservation Service, Reproductive Services Unit, Royal Women's Hospital, Parkville, 3051, Australia.<br>Fertility Preservation Service, Melbourne IVF, East Melbourne, 3002, Australia.                                                  |
| 7                                | Children's National Hospital, 111 Michigan Avenue NW, Washington, DC 20010, USA (ZIA# HD008985).                                                                                                                                                    |
| 8                                | Center for Reproductive Medicine, Michigan Medicine, 475 Market Place, Building 1, Suite B, Ann Arbor, MI 48108, USA.                                                                                                                               |
| 9                                | Fertility Research Centre, Royal Hospital for Women, Barker Street, Sydney, Australia.                                                                                                                                                              |
| 10                               | Stanford University Medical Center, 300 Pasteur Drive, Stanford, CA, USA.                                                                                                                                                                           |
| 11                               | University of Edinburgh, Edinburgh, UK.<br>Royal Infirmary of Edinburgh and Royal Hospital for Children and Young People, Little France Crescent, Edinburgh, UK.                                                                                    |
| 12                               | Nationwide Children's Hospital, 700 Children's Dr., Columbus, OH 43205, USA.                                                                                                                                                                        |
| 13                               | University of Pennsylvania, Division of Reproductive Endocrinology & Infertility, 3701 Market Street, Suite 8000, Philadelphia, PA 19104, USA.                                                                                                      |
| 14                               | New York University, NYU Langone Fertility Center, 660 First Ave, 5th Floor, New York, NY 10016, USA.                                                                                                                                               |
| 15                               | UniKiD - Center for Reproductive Medicine, UniCareD - Center for Fertility Preservation, Düsseldorf University Hospital, Moorenstrasse 5, D-40225 Düsseldorf, Germany.                                                                              |
| 16                               | Laboratory of Reproductive Biology, Juliane Marie Centre for Women, Children and Reproduction, University Hospital of Copenhagen, Blegdamsvej 9, DK-2100 Copenhagen, Denmark.                                                                       |
| 17                               | Fertility Preservation Service, The Royal Children's Hospital, Flemington Rd, Parkville, Melbourne, Vic 3054, Australia.                                                                                                                            |
| 18                               | University of California, San Diego, 3855 Health Sciences Drive, La Jolla, CA 92039-0901, USA.                                                                                                                                                      |
| 19                               | Cliniques Universitaires Saint Luc, Université Catholique de Louvain, Avenue Hippocrate, 10, 1200 Brussels, Belgium.<br>Université Catholique de Louvain, Avenue Mounier 52, 1200 Brussels, Belgium.                                                |
| 20                               | Fertility Clinic and Research Laboratory on Human Reproduction, CUB-Erasme Hospital, Université Libre de Bruxelles (ULB), 808 route de Lennik, 1070 Brussels, Belgium.                                                                              |
| 21                               | Centre for Reproductive Medicine of UZ Brussel, Laarbeeklaan 101, 1090 Brussels, Belgium.                                                                                                                                                           |
| 22                               | Gynecological Endocrinology and Reproductive Medicine Division, Obstetrics and Gynecology Department, Cologne University Hospital, Cologne, Germany.                                                                                                |
| 23                               | Center for Reproduction and Transplantation, Magee-Womens Hospital, University of Pittsburgh Medical Center, 300 Halket Street, Pittsburgh, PA 15213, USA.                                                                                          |
| 24                               | University of Cincinnati, Department of Obstetrics and Gynecology, Division for REI, Cincinnati, OH 45229, USA.<br>Cincinnati Children's Hospital Medical Center, Division of Pediatric Adolescent Gynecology Pediatric, Cincinnati, OH 45229, USA. |
| 25                               | Urology Department, UCSF Medical Center, University of California, San Francisco, CA 94143, USA.<br>Obstetrics and Gynecology Department, UCSF Medical Center, University of California, San Francisco, CA 94143, USA.                              |

3, 4, and 5). Responses for childhood, breast, and blood cancers and their calculated oncofertility scores are listed in Tables 3, 4, and 5.

The oncofertility scores for options provided to children with cancer in all 25 surveyed centers were as follows: gonadal shielding in case of irradiation (69%), ovarian tissue freezing (63%), fractionation of chemo- and radiotherapy (61%), oophoropexy in case of pelvic irradiation (42%), testicular tissue freezing (41%), GnRH analogs in case of old child (9-14 years) (35%), oocyte in vitro maturation (IVM) (18%),

neoadjuvant cytoprotective pharmacotherapy (6%), artificial ovary (2%), in vitro spermatogenesis (2%), and stem cells (0%) (Table 3 and Fig. 3).

The oncofertility scores for options provided to female patients with breast cancer in all 25 surveyed centers were as follows: egg freezing (77%), IVF/ICSI of frozen oocytes (75%), gonadal shielding in case of irradiation (75%), embryo freezing (66%), frozen embryo transfer (64%), fractionation of chemo- and radiotherapy (62%), GnRH analogs (61%), ovarian tissue freezing (49%), autotransplantation of frozen

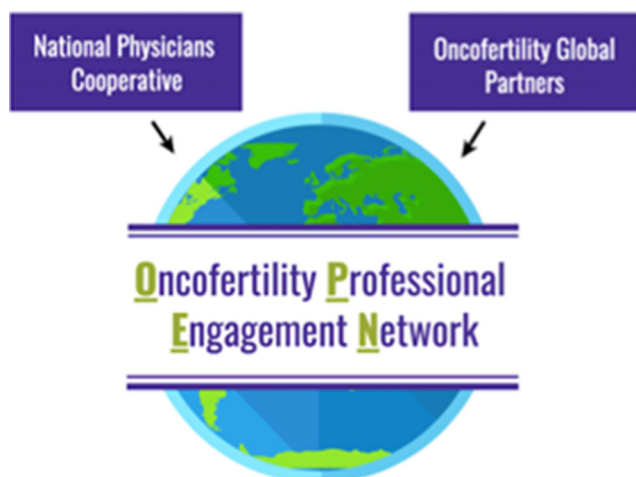

**Fig. 1** Merger of American and global networks into one unified network, the Oncofertility Professional Engagement Network (OPEN)

ovarian tissue (43%), oocyte in vitro maturation (IVM) (23%), neoadjuvant cytoprotective pharmacotherapy (5%), artificial ovary (2%), and stem cells (0%) (Table 4 and Fig. 4).

The oncofertility scores for options provided to patients with blood cancer in all 25 surveyed centers were as follows: sperm freezing (83%), gonadal shielding in case of irradiation (75%), egg freezing (68%), fractionation of chemo- and radiotherapy (62%), embryo freezing (58%), ovarian tissue freezing (57%), GnRH analogs (57%), oophorectomy in case of pelvic irradiation (46%), testicular tissue freezing (38%), oocyte in vitro maturation (IVM) (23%), neoadjuvant cytoprotective pharmacotherapy (7%), artificial ovary (2%), in vitro spermatogenesis (2%), and stem cells (0%) (Table 5 and Fig. 5).

## Discussion

In our Repro-Can-OPEN Study Part 2, the responses and their calculated oncofertility scores (Tables 3, 4, and 5 and Figs. 3, 4, and 5) showed three major characteristics of oncofertility

practice in optimum resource settings: (1) strong utilization of sperm freezing, egg freezing, embryo freezing, ovarian tissue freezing, gonadal shielding, and fractionation of chemo- and radiotherapy; (2) promising utilization of GnRH analogs, oophorectomy, testicular tissue freezing, and oocyte in vitro maturation (IVM); and (3) rare utilization of neoadjuvant cytoprotective pharmacotherapy, artificial ovary, in vitro spermatogenesis, and stem cell reproductive technology as they are still in preclinical or early clinical research settings.

Proper technical and ethical concerns should be considered when offering advanced and experimental oncofertility options to patients including gonadal tissue freezing and autotransplantation, in vitro maturation of gametes, artificial gonad technology, neoadjuvant cytoprotective pharmacotherapy, and stem cell reproductive technology. Technically, the aforementioned advanced oncofertility options are sophisticated procedures that require well-resourced oncofertility centers with expert teams of oncologists, reproductive endocrinology and infertility specialists, pediatric and adolescent gynecologists, urologists, pediatric endocrinologists, biologists, embryologists, scientists, and transplantation surgeons. That is why they should be performed only at highly specialized oncofertility centers in optimum resource settings. Early referral of cancer patients to such highly specialized oncofertility centers is strongly recommended. Ethically, most of these advanced oncofertility options are experimental or have limited data on efficacy, and it is essential that they are offered to patients under clear ethical regulations. Special ethical and legal considerations need to be considered in children [11, 12]. Obtaining ethical approval from the Institutional Review Board (IRB) or the equivalent ethics committee is essential, as is obtaining informed consent from the patients or the legal guardians in the case of a minor. Informed consent for experimental medical treatments and interventions should include the explanation of the procedures, benefits, risks, alternative treatments, and information about the expected outcome and costs. Several oncofertility

**Table 2** Oncofertility score calculation

| Availability and utilization of an oncofertility option | Available and always used for cancer patients | Available and commonly used for cancer patients | Available but occasionally used for cancer patients | Available but rarely used or only used in research settings for cancer patients | Not available |
|---------------------------------------------------------|-----------------------------------------------|-------------------------------------------------|-----------------------------------------------------|---------------------------------------------------------------------------------|---------------|
| Scale symbol                                            | ++++                                          | +++                                             | ++                                                  | +                                                                               | -             |
| Actual points (AP)<br>(25 points per +)                 | 100                                           | 75                                              | 50                                                  | 25                                                                              | 0             |
| Maximal points (MP)<br>(100 points per +++)             | 100                                           | 100                                             | 100                                                 | 100                                                                             | 100           |
| Oncofertility score = AP/MP (%)                         | 100%                                          | 75%                                             | 50%                                                 | 25%                                                                             | 0%            |

**Fig. 2** Oncofertility score calculation

$$\text{Oncofertility Score} = \frac{\text{Actual Points (AP) of utilization that an oncofertility option might have}}{\text{Maximal Points (MP) of utilization that an oncofertility option might have}} \%$$

options are expensive and not fully covered by health insurance in some states and countries, leaving many patients under critical financial pressure. In such complex situations, doctors and patient navigators as well as patient support and advocacy organizations can play an important role in reassuring and guiding patients or legal guardians of minors during counseling [13–18].

### Installing oncofertility programs in optimum resource settings

Based on the responses and their calculated oncofertility scores (Tables 3, 4, and 5 and Figs. 3, 4, and 5), we will try here to tailor and install plausible oncofertility programs for common cancers in optimum resource settings as an extrapolation for best practice models (Table 6). Previous international oncofertility guidelines and recommendations were considered as well [19–35]. Immediately after cancer diagnosis, we recommend early referrals of patients to oncofertility specialists to check the anticancer therapy plan and estimate the related risk of gonadotoxicity and subsequent fertility loss. The risk of anticancer therapy-induced gonadotoxicity and fertility loss depends mainly on the type and stage of the disease, type and dose of anticancer therapy, and the age of the patient at the time of treatment. If the risk of gonadotoxicity and fertility loss is detected or even unknown, a comprehensive multidisciplinary oncofertility strategy should be offered before, during, and after anticancer therapy.

From a practical point of view, an effective oncofertility strategy should be individualized and tailored to the patient's circumstances and it may integrate various established, debatable, and experimental options after proper counseling and obtaining informed consent from the patient or the legal guardians of a minor. It is recommended that the proposed oncofertility strategy should include at least one cryopreservation option. After complete cure from cancer, and when the patient decides to have biological children, a new assessment of reproductive functions should be performed. If anticancer therapy-induced gonadal dysfunction exists, fertility restoration may be achieved by using the cryopreserved gametes or gonadal tissue.

### Installing oncofertility programs for childhood cancer in optimum resource settings

The common forms of childhood cancers that may require aggressive gonadotoxic anticancer therapy and hence necessitate prior fertility preservation measures are leukemia, central nervous system cancers, lymphoma, and sarcomas. Unique medical challenges in oncofertility programs for childhood cancer exist and include the following: (1) freezing of gonadal tissues is the only suitable cryopreservation option before puberty, and (2) autotransplantation of frozen gonadal tissue may carry the risk of reintroducing malignant cells, especially in leukemia which is the most common childhood cancer [36–42].

According to the aforementioned unique medical challenges, as well as the responses and their calculated oncofertility scores (Table 3 and Fig. 3), we suggest installing the following oncofertility programs for childhood cancer in optimum resource settings. Before initiation of anticancer therapy, freezing of prepubertal gonadal tissues (ovarian or testicular tissue) should be encouraged and attempted when possible. In vitro maturation and further vitrification of gametes (oocytes or spermatozoa) and artificial gonad technology (ovary or testis) are still experimental and cannot be relied upon as effective oncofertility options in children. Although experimental, these emerging technologies of in vitro maturation of gametes and artificial gonads aim to provide safe alternatives to avoid future gonadal tissue autotransplantation and potential reintroduction of malignant cells. Oophoropexy before female pelvis irradiation should be attempted when possible. During anticancer therapy, gonadal shielding in case of irradiation should be attempted. Fractionation of chemo- and radiotherapy could be attempted whenever deemed feasible by the oncologists. Use of GnRH analogs to preserve fertility during chemotherapy in case of older children (9–14 years) is widely debated and needs more research to inform evidence-based practice. Neoadjuvant cytoprotective pharmacotherapy is still experimental and not yet clinically proven as an effective oncofertility option. After anticancer therapy, gonadal function should be monitored to ensure appropriate growth, pubertal development, and reproductive function, with hormone replacement introduced in those with gonadal failure. Furthermore, regular follow-up in survivorship offers a window of opportunity for interval fertility and sexual healthcare, linking patients in with the tissue storage laboratory, and discussing

**Table 3** Oncofertility options and scores (%) for childhood cancer in all 25 surveyed centers

| Oncofertility Center                                                                | 1        | 2        | 3        | 4        | 5        | 6        | 7        | 8        | 9        | 10       | 11       | 12       | 13       | 14       | 15       | 16       | 17       | 18       | 19       | 20       | 21       | 22       | 23       | 24       | 25       | Total Actual Points | Oncofertility Score (%) |    |
|-------------------------------------------------------------------------------------|----------|----------|----------|----------|----------|----------|----------|----------|----------|----------|----------|----------|----------|----------|----------|----------|----------|----------|----------|----------|----------|----------|----------|----------|----------|---------------------|-------------------------|----|
| <b>Available fertility preservation options for girls with cancer</b>               |          |          |          |          |          |          |          |          |          |          |          |          |          |          |          |          |          |          |          |          |          |          |          |          |          |                     |                         |    |
| - Ovarian tissue freezing                                                           | Yes (++) | No       | Yes (++) | No       | Yes (++) | Yes (++) | No       | Yes (++)            | 1575                    | 63 |
| - Oophorectomy in case of pelvic irradiation                                        | Yes (++) | Yes (++) | Yes (++) | No       | Yes (++) | No       | Yes (++) | Yes (++) | Yes (++) | Yes (++) | No       | Yes (++)            | 1050                    | 42 |
| - Oocyte in vitro maturation (IVM)                                                  | No       | No       | Yes (++) | No       | No       | Yes (++) | No       | No       | Yes (++) | Yes (++) | No       | No       | No       | No       | No       | Yes (++) | Yes (++) | No       | No       | Yes (++) | Yes (++) | Yes (++) | Yes (++) | No       | Yes (++) | 450                 | 18                      |    |
| - Artificial ovary                                                                  | No*      | No       | Yes (++) | Yes (++) | No       | No       | 50                  | 2                       |    |
| <b>Available fertility preservation options for boys with cancer</b>                |          |          |          |          |          |          |          |          |          |          |          |          |          |          |          |          |          |          |          |          |          |          |          |          |          |                     |                         |    |
| - Testicular tissue freezing                                                        | Yes (++) | Yes (++) | Yes (++) | No       | No       | Yes (++) | Yes (++) | No       | No       | Yes (++) | No       | Yes (++)            | 1025                    | 41 |
| - In vitro spermatogenesis                                                          | No                  | 50                      | 2  |
| <b>Available fertility preservation options for both girls and boys with cancer</b> |          |          |          |          |          |          |          |          |          |          |          |          |          |          |          |          |          |          |          |          |          |          |          |          |          |                     |                         |    |
| - GnRH analogs in case of old child (9-14 year)                                     | Yes (++) | Yes (++) | No       | No       | Yes (++) | No       | Yes (++) | Yes (++) | Yes (++) | Yes (++) | No       | Yes (++) | No       | No       | No       | Yes (++) | No       | Yes (++) | Yes (++)            | 875                     | 35 |
| - Gonadal shielding in case of irradiation                                          | Yes (++) | No       | Yes (++)            | 1725                    | 69 |
| - Fractionation of chemo- and radiotherapy                                          | Yes (++) | Yes (++) | Yes (++) | No       | No       | Yes (++) | No       | Yes (++)            | 1525                    | 61 |
| - Neoadjuvant cytoreductive chemotherapy                                            | No       | Yes (++) | No       | No       | No       | Yes (++) | No       | No       | Yes (++) | Yes (++) | No       | No       | No       | No       | No       | Yes (++) | No       | Yes (++) | 150                 | 6                       |    |
| - Stem cells reproductive technology                                                | No                  | 0                       | 0  |

(+++++) Available and always used for cancer patients, (++++) available and commonly used for cancer patients, (+++) available but occasionally used for cancer patients, (++) available but rarely used or only used in research setting for cancer patients, (+) available but occasionally used for cancer patients, (0) not available, (No\*) not available because it is still in the preclinical research stage

**Table 4** Oncofertility options and scores (%) for breast cancer in all 25 surveyed centers

| Oncofertility Center                                                        | 1        | 2        | 3        | 4        | 5        | 6        | 7        | 8        | 9        | 10       | 11       | 12       | 13       | 14       | 15       | 16       | 17       | 18       | 19       | 20       | 21       | 22       | 23       | 24       | 25       | Total Actual Points | Oncofertility Score (%) |    |
|-----------------------------------------------------------------------------|----------|----------|----------|----------|----------|----------|----------|----------|----------|----------|----------|----------|----------|----------|----------|----------|----------|----------|----------|----------|----------|----------|----------|----------|----------|---------------------|-------------------------|----|
| <b>Available fertility preservation options before anticancer treatment</b> |          |          |          |          |          |          |          |          |          |          |          |          |          |          |          |          |          |          |          |          |          |          |          |          |          |                     |                         |    |
| - Embryo freezing                                                           | Yes (++) | Yes (++) | Yes (++) | Yes (++) | No       | Yes (++)            | 1650                    | 66 |
| - Egg freezing                                                              | Yes (++) | Yes (++) | Yes (++) | Yes (++) | No       | Yes (++)            | 1925                    | 77 |
| - Ovarian tissue freezing                                                   | Yes (++) | No       | Yes (++)            | 1225                    | 49 |
| - Oocyte in vitro maturation (IVM)                                          | Yes (++) | Yes (++) | Yes (++) | Yes (++) | No       | Yes (++) | No       | Yes (++) | Yes (++) | Yes (++) | No       | Yes (++) | Yes (++) | Yes (++) | No       | Yes (++) | Yes (++) | No       | No       | Yes (++) | Yes (++) | Yes (++) | Yes (++) | No       | Yes (++) | Yes (++)            | 575                     | 23 |
| - Artificial ovary                                                          | No*      | No       | Yes (++) | Yes (++) | No       | No       | 50                  | 2                       |    |
| <b>Available fertility preservation options during anticancer treatment</b> |          |          |          |          |          |          |          |          |          |          |          |          |          |          |          |          |          |          |          |          |          |          |          |          |          |                     |                         |    |
| - GnRH analogs                                                              | Yes (++) | Yes (++) | Yes (++) | No       | Yes (++)            | 1525                    | 61 |
| - Gonadal shielding in case of Fractionation of chemo- and radiotherapy     | Yes (++) | Yes (++) | Yes (++) | No       | Yes (++)            | 1875                    | 75 |
| - Neoadjuvant cytoreductive chemotherapy                                    | No       | Yes (++) | Yes (++) | No       | No       | Yes (++) | Yes (++) | No       | Yes (++)            | 1550                    | 62 |
| <b>Available fertility restoration options after anticancer treatment</b>   |          |          |          |          |          |          |          |          |          |          |          |          |          |          |          |          |          |          |          |          |          |          |          |          |          |                     |                         |    |
| - Frozen embryo transfer                                                    | Yes (++)            | 125                     | 5  |
| - IVF/ICS of frozen oocytes                                                 | Yes (++)            | 1600                    | 64 |
| - Autologous transplantation of frozen ovarian tissue                       | Yes (++) | No       | Yes (++)            | 1875                    | 75 |
| - Stem cells reproductive technology                                        | No                  | 0                       | 0  |

(+++++) Available and always used for cancer patients, (++++) available and commonly used for cancer patients, (+++) available but occasionally used for cancer patients, (++) available but rarely used or only used in research setting for cancer patients, (+) available but occasionally used for cancer patients, (0) not available, (No\*) not available because it is still in the preclinical research stage

**Table 5** Oncofertility options and scores (%) for blood cancer in all 25 surveyed centers

| Oncofertility Center                                                              | 1        | 2        | 3        | 4        | 5        | 6        | 7        | 8        | 9        | 10       | 11       | 12       | 13       | 14       | 15       | 16       | 17       | 18       | 19       | 20       | 21       | 22       | 23       | 24       | 25       | Total Actual Points | Oncofertility Score (%) |    |
|-----------------------------------------------------------------------------------|----------|----------|----------|----------|----------|----------|----------|----------|----------|----------|----------|----------|----------|----------|----------|----------|----------|----------|----------|----------|----------|----------|----------|----------|----------|---------------------|-------------------------|----|
| <b>Available fertility preservation options for female patients</b>               |          |          |          |          |          |          |          |          |          |          |          |          |          |          |          |          |          |          |          |          |          |          |          |          |          |                     |                         |    |
| - Embryo freezing                                                                 | Yes (++) | Yes (++) | Yes (++) | Yes (++) | No       | Yes (++) | No       | Yes (++)            | 1450                    | 58 |
| - Egg freezing                                                                    | Yes (++)            | 1700                    | 68 |
| - Ovarian tissue freezing                                                         | Yes (++) | No       | Yes (++) | No       | Yes (++)            | 1425                    | 57 |
| - Oophorectomy in case of pelvic irradiation                                      | Yes (++) | Yes (++) | Yes (++) | No       | Yes (++)            | 1150                    | 46 |
| - Oocyte in vitro maturation (IVM)                                                | Yes (++) | Yes (++) | Yes (++) | Yes (++) | No       | Yes (++) | No       | No       | Yes (++) | Yes (++) | No       | No       | Yes (++) | Yes (++) | No       | Yes (++) | Yes (++) | No       | No       | Yes (++)            | 575                     | 23 |
| - Artificial ovary                                                                | No       | Yes (++) | Yes (++) | No       | No       | No                  | 50                      | 2  |
| <b>Available fertility preservation options for male patients</b>                 |          |          |          |          |          |          |          |          |          |          |          |          |          |          |          |          |          |          |          |          |          |          |          |          |          |                     |                         |    |
| - Sperm freezing                                                                  | Yes (++)            | 2075                    | 83 |
| - Testicular tissue freezing                                                      | Yes (++) | Yes (++) | Yes (++) | No       | No       | Yes (++) | Yes (++) | No       | No       | Yes (++) | Yes (++) | Yes (++) | Yes (++) | No       | Yes (++)            | 950                     | 38 |
| - In vitro spermatogenesis                                                        | No       | Yes (++)            | 50                      | 2  |
| <b>Available fertility preservation options for both female and male patients</b> |          |          |          |          |          |          |          |          |          |          |          |          |          |          |          |          |          |          |          |          |          |          |          |          |          |                     |                         |    |
| - GRT/IRI analogs                                                                 | Yes (++) | Yes (++) | Yes (++) | No       | Yes (++)            | 1425                    | 57 |
| - Gonadal shielding in case of irradiation                                        | Yes (++) | Yes (++) | Yes (++) | No       | Yes (++)            | 1875                    | 75 |
| - Fractionation of chemo- and radiotherapy                                        | Yes (++) | Yes (++) | Yes (++) | No       | No       | Yes (++)            | 1550                    | 62 |
| - Neoadjuvant cyclophosphamide pharmacotherapy                                    | No       | Yes (++)            | 175                     | 7  |
| - Stem cells reproductive technology                                              | No                  | 0                       | 0  |

(+++): Available and always used for cancer patients, (++) available and commonly used for cancer patients, (+) available but occasionally used for cancer patients, (0) not available, (No) not available, (No\*) not available because it is still in the preclinical research stage used in research setting for cancer patients, (No) not available but rarely used or only

expectations around relationships, pregnancy, and parenthood [43]. When the patient becomes an adult and wishes to have children, fertility restoration may be possible using stored gonadal tissue or gametes. Autotransplantation of gonadal tissue can be offered to restore fertility but it should be handled with caution in patients with leukemia due to possible contamination of gonadal tissue with leukemic cells. According to few reports, harvesting gonadal tissue after the first cycles of anticancer therapy and during complete remission followed by proper gonadal tissue assessment for minimal residual disease (MRD) may reduce the risk of reintroducing leukemic cells with autotransplantation [44, 45]. For additional safety measures, it may be a possible option for patients with leukemia to remove the transplanted gonadal tissue later after restoring fertility and having biological children [46, 47]. Stem cell reproductive technology may be promising in research settings but it is not yet clinically proven as an effective oncofertility option (Table 6).

**Installing oncofertility programs for breast cancer in optimum resource settings**

Breast cancer is the most common cancer in women during their reproductive years. Breast cancer may require aggressive gonadotoxic anticancer therapy and hence necessitate prior fertility preservation measures. Women with *BRCA1* or *BRCA2* mutations carry significantly higher risks to develop breast and ovarian cancers (hereditary breast-ovarian cancer syndrome; HBOC), and they should receive appropriate oncofertility care as well. According to a recent large study, the cumulative breast cancer risk is 72% for *BRCA1* and 69% for *BRCA2* carriers, while the cumulative ovarian cancer risk is 44% for *BRCA1* and 17% for *BRCA2* carriers [48]. Unique medical challenges in oncofertility programs for breast cancer exist and include the following: (1) conventional ovarian stimulation prior to egg or embryo freezing results in elevated serum estradiol levels that should be avoided in estrogen sensitive malignancies such as breast cancer, and (2) autotransplantation of frozen ovarian tissue in patients with *BRCA* mutations should be handled with caution due to significantly higher risks of developing ovarian cancer [49–53].

According to the aforementioned unique medical challenges as well as the responses and their calculated oncofertility scores (Table 4 and Fig. 4), we suggest installing the following oncofertility programs for breast cancer in optimum resource settings. Before initiation of anticancer therapy, freezing of eggs or embryos should be attempted with a random-start protocol for controlled ovarian stimulation and using letrozole or tamoxifen to avoid high estradiol levels. Freezing of ovarian tissue should be attempted when possible. In vitro maturation and further vitrification of oocytes retrieved in vivo or ex vivo from the extracted ovarian tissue (ovarian tissue oocytes in vitro maturation; OTO-IVM) could be attempted [54–56]. Artificial ovary technology is still experimental and cannot be relied upon alone as an

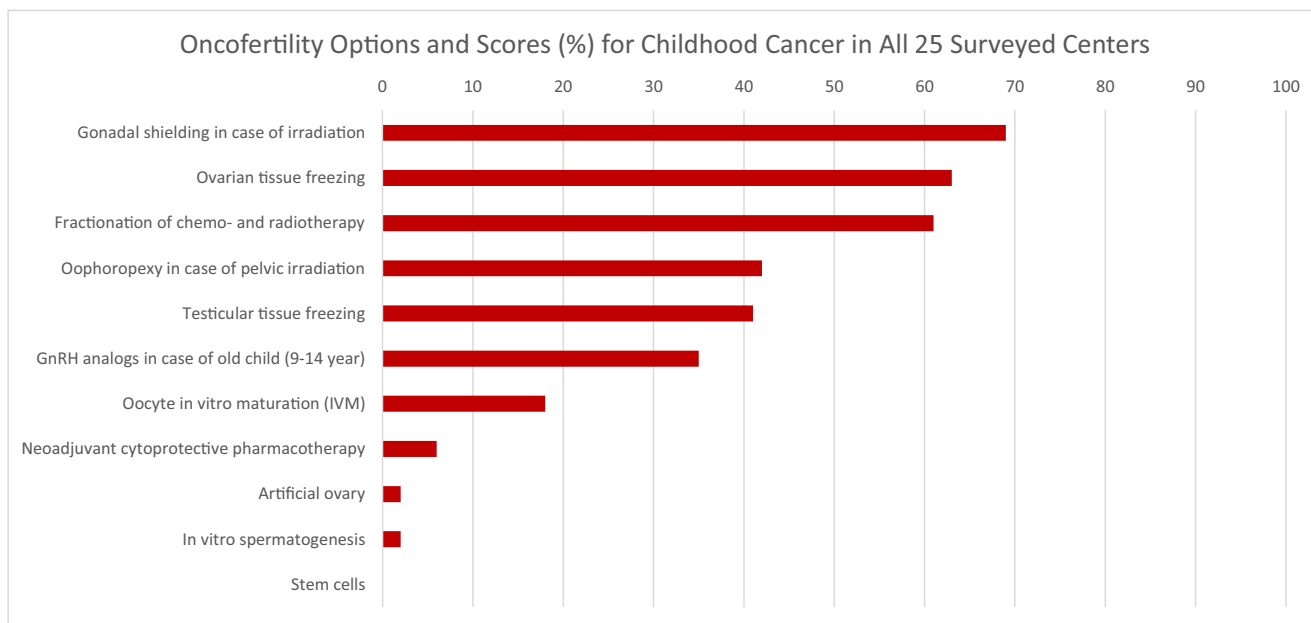

**Fig. 3** Oncofertility options and scores (%) for childhood cancer in all 25 surveyed centers

effective oncofertility option. Although experimental, oocyte IVM and artificial ovary technology aim to provide safe alternatives to avoid future ovarian tissue autotransplantation and potential reintroduction of malignant cells. During anticancer therapy, GnRH analog administration before and during chemotherapy can be considered. Fractionation of chemo- and radiotherapy could be attempted whenever deemed feasible by the oncologists. Gonadal shielding might be needed in case of combined irradiation to ovaries. Neoadjuvant cytoprotective pharmacotherapy is still experimental and not yet clinically proven as an effective oncofertility option. After anticancer therapy, fertility restoration may be achieved by frozen embryo transfer, or in vitro fertilization of stored oocytes. Patients with *BRCA* mutations could be advised to use preimplantation genetic testing (PGT)

during in vitro fertilization to avoid transmitting the mutation. Autotransplantation of frozen ovarian tissue can be offered to restore fertility but it should be handled with caution in patients with *BRCA* mutations due to significantly higher risks of developing ovarian cancer. Proper ovarian tissue assessment in patients with *BRCA* mutations is mandatory to reduce the risk of reintroducing malignant cells with autotransplantation. For additional safety measures, it may be a possible option for patients with *BRCA* mutations to remove the transplanted ovarian tissue as well as the remaining ovary (if any) after childbearing is complete and at the time of an elective caesarian section. Stem cell reproductive technology may be promising in research settings but it is not yet clinically proven as an effective oncofertility option (Table 6).

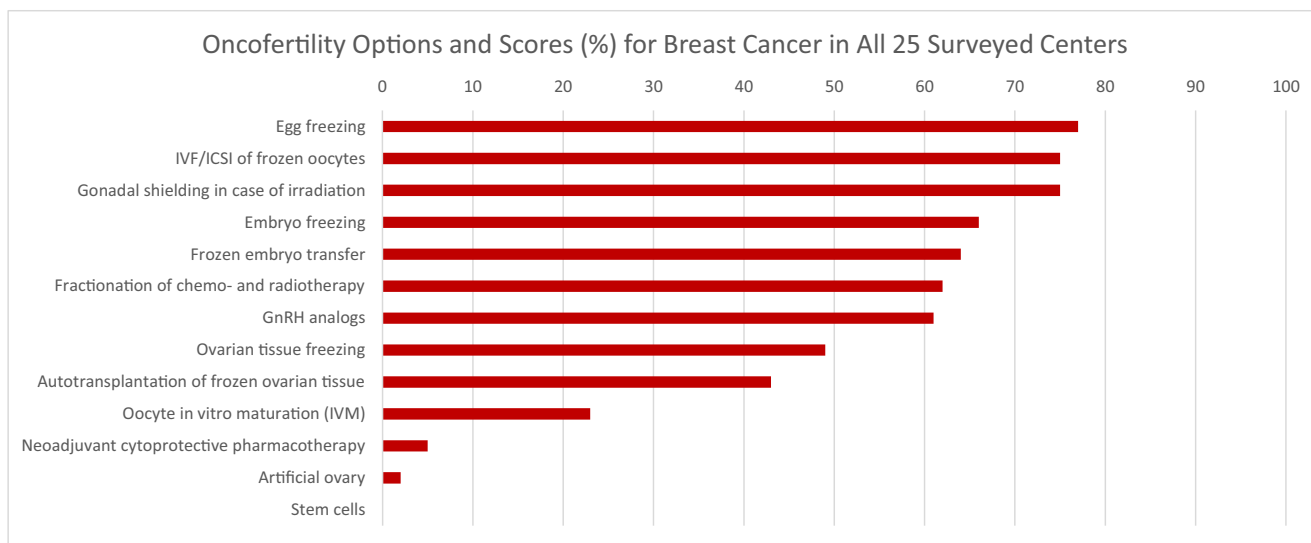

**Fig. 4** Oncofertility options and scores (%) for breast cancer in all 25 surveyed centers

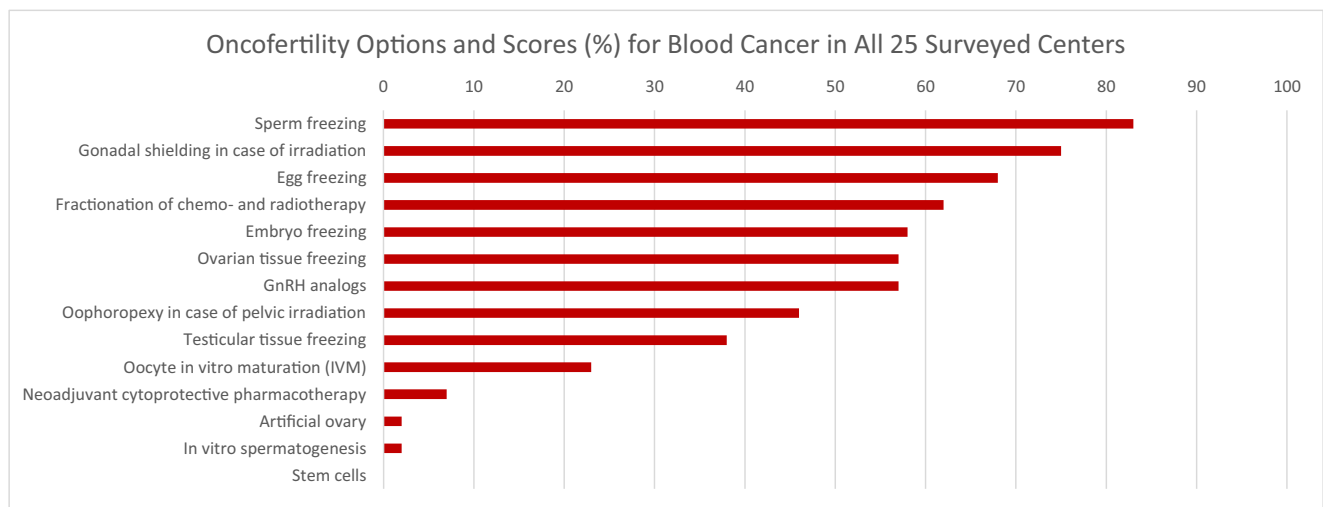

**Fig. 5** Oncofertility options and scores (%) for blood cancer in all 25 surveyed centers

### Installing oncofertility programs for blood cancer in optimum resource settings

The common forms of blood cancers that occur during the reproductive age and may require immediate aggressive gonadotoxic anticancer therapy and hence necessitate prior fertility preservation measures are acute lymphocytic leukemia (ALL), acute myeloid leukemia (AML), non-Hodgkin lymphoma (NHL), and Hodgkin lymphoma (HL). Unique medical challenges in oncofertility programs for blood cancer exist and include the following: (1) most cases of blood cancer especially leukemia necessitate immediate initiation of anticancer therapy leaving very short time to offer fertility preservation options, thus may be precluded by the health status of the patient and the time available, and (2) autotransplantation of frozen gonadal tissue may carry the risk of reintroducing malignant cells, especially in leukemia [57–59].

According to the aforementioned unique medical challenges as well as the responses and their calculated oncofertility scores (Table 5 and Fig. 5), we suggest installing the following oncofertility programs for blood cancer in optimum resource settings. Before initiation of anticancer therapy, freezing of embryos or gametes (oocytes or spermatozoa) should be attempted when possible. Freezing of gonadal tissues (ovarian or testicular tissue) should be attempted after proper tissue assessment to exclude contamination with malignant cells. In vitro maturation and further vitrification of gametes retrieved in vivo or ex vivo from the extracted gonadal tissue could be attempted. Artificial gonad technology is still experimental and cannot be relied upon alone as an effective oncofertility option. Although experimental, these emerging technologies of in vitro maturation of gametes and artificial gonads aim to provide safe alternatives to avoid future gonadal tissue autotransplantation and potential reintroduction

of malignant cells. Oophoropexy before female pelvis irradiation should be attempted when possible. During anticancer therapy, gonadal shielding in case of irradiation should be attempted. Fractionation of chemo- and radiotherapy could be attempted whenever deemed feasible by the oncologists. Use of GnRH analogs to preserve fertility during chemotherapy in case of hematological malignancies is widely debated and needs more research to inform evidence-based practice. Neoadjuvant cytoprotective pharmacotherapy is still experimental and not yet clinically proven as an effective oncofertility option. After anticancer therapy, fertility restoration may be achieved by frozen embryo transfer, or in vitro fertilization of stored gametes. Autotransplantation of frozen gonadal tissue can be offered to restore fertility but it should be handled with caution in patients with leukemia due to possible contamination of gonadal tissue with leukemic cells. According to a few reports, harvesting gonadal tissue after the first cycles of anticancer therapy and during complete remission followed by proper gonadal tissue assessment for minimal residual disease (MRD) may reduce the risk of reintroducing leukemic cells with autotransplantation. For additional safety measures, it may be a possible option for patients with leukemia to remove the transplanted gonadal tissue later after restoring fertility and having biological children [46, 47]. Stem cell reproductive technology may be promising in research settings but it is not yet clinically proven as an effective oncofertility option (Table 6).

After installation of these specific oncofertility programs for common cancers in optimum resource settings, we encourage using the “oncofertility score” as a prognostic tool to follow up on the development of these new oncofertility programs over time.

In cases where oncofertility options are rejected, contraindicated, infeasible, unsuccessful, or unavailable, adoption and



**Table 6** Suggested best practice models: plausible fertility preservation and restoration strategies for cancer patients

| Cancer Patients                                                                                     | Before anticancer therapy (Fertility Preservation)                                                                                                                                                                                                                                                                                                                   | During anticancer therapy (Fertility Preservation)                                                                                                                                                                                                                                                  | After anticancer therapy (Fertility Restoration)                                                                                                                                                                                                                                                                         |
|-----------------------------------------------------------------------------------------------------|----------------------------------------------------------------------------------------------------------------------------------------------------------------------------------------------------------------------------------------------------------------------------------------------------------------------------------------------------------------------|-----------------------------------------------------------------------------------------------------------------------------------------------------------------------------------------------------------------------------------------------------------------------------------------------------|--------------------------------------------------------------------------------------------------------------------------------------------------------------------------------------------------------------------------------------------------------------------------------------------------------------------------|
| <b>Childhood Cancer</b> (♀ & ♂)<br>Leukemias, central nervous system cancers, lymphoma and sarcomas | <ul style="list-style-type: none"> <li>- Freezing of gonadal tissue</li> <li>- In vitro maturation and vitrification of gametes (promising in research but not yet clinically proven in children)</li> <li>- Oophoropexy in case of female pelvic radiation</li> <li>- Artificial gonads technology (promising in research but not yet clinically proven)</li> </ul> | <ul style="list-style-type: none"> <li>- Gonadal shielding</li> <li>- Fractionation of chemo- and radiotherapy</li> <li>- GnRH analogs in case of old child (widely debated)</li> <li>- Neoadjuvant cytoprotective pharmacotherapy (promising in research but not yet clinically proven)</li> </ul> | <ul style="list-style-type: none"> <li>- IVF/ICSI of frozen gametes</li> <li>- Autotransplantation of frozen gonadal tissue (should be utilized with caution in leukemia)</li> <li>- Stem cells (promising in research but not yet clinically proven)</li> </ul>                                                         |
| <b>Breast Cancer</b> (♀)<br>Patients with or without BRCA mutations                                 | <ul style="list-style-type: none"> <li>- Egg freezing</li> <li>- Embryo freezing</li> <li>- Ovarian tissue freezing</li> <li>- In vitro maturation (IVM) of oocytes and vitrification</li> <li>- Artificial ovary technology (promising in research but not yet clinically proven)</li> </ul>                                                                        | <ul style="list-style-type: none"> <li>- GnRH analogs</li> <li>- Fractionation of chemo- and radiotherapy</li> <li>- Gonadal shielding</li> <li>- Neoadjuvant cytoprotective pharmacotherapy (promising in research but not yet clinically proven)</li> </ul>                                       | <ul style="list-style-type: none"> <li>- Intrauterine transfer of frozen embryo</li> <li>- IVF/ICSI of frozen oocytes</li> <li>- Autotransplantation of frozen ovarian tissue (should be utilized with caution in BRCA mutations)</li> <li>- Stem cells (promising in research but not yet clinically proven)</li> </ul> |
| <b>Blood Cancer</b> (♀ & ♂)<br>Leukemia (ALL, AML), and Lymphoma (NHL, HL)                          | <ul style="list-style-type: none"> <li>- Freezing of gametes (when possible)</li> <li>- Freezing of gonadal tissue</li> <li>- In vitro maturation and vitrification of gametes</li> <li>- Oophoropexy in case of female pelvic radiation</li> <li>- Artificial gonads technology (promising in research but not yet clinically proven)</li> </ul>                    | <ul style="list-style-type: none"> <li>- GnRH analogs (widely debated)</li> <li>- Gonadal shielding</li> <li>- Fractionation of chemo- and radiotherapy</li> <li>- Neoadjuvant cytoprotective pharmacotherapy (promising in research but not yet clinically proven)</li> </ul>                      | <ul style="list-style-type: none"> <li>- Intrauterine transfer of frozen embryo</li> <li>- IVF/ICSI of frozen gametes</li> <li>- Autotransplantation of frozen gonadal tissue (should be utilized with caution in leukemia)</li> <li>- Stem cells (promising in research but not yet clinically proven)</li> </ul>       |

third-party reproduction, such as sperm, egg, and embryo donation and surrogacy, can be offered as family building alternatives.

### Next steps and future directions of Repro-Can-OPEN Studies

In our next Repro-Can-OPEN studies, we are planning to investigate in detail the oncofertility programs offered to leukemia and lymphoma patients according to their gender and age group. We are planning also to investigate other cancers as well as other patient groups (e.g., LGBTQ population: lesbian, gay, bisexual, transgender, and queer or questioning) who were not included in our previous studies. We will provide further discussions on the advanced and the emerging oncofertility options, and highlight the recent achievements in the related preclinical research [60–65]. The Oncofertility Consortium will continue to engage more stakeholders from the USA and abroad to help build a sustainable oncofertility core competency worldwide.

### Conclusion

Our Repro-Can-OPEN Study Part 2 proposed installing specific oncofertility programs for common cancers in optimum resource settings as an extrapolation for best practice models. Responses for childhood, breast, and blood cancers and their calculated oncofertility scores showed three major characteristics of oncofertility practice in optimum resource settings: (1) strong utilization of sperm freezing, egg freezing, embryo freezing, ovarian tissue freezing, gonadal shielding, and fractionation of chemo- and radiotherapy; (2) promising utilization of GnRH analogs, oophoropexy, testicular tissue freezing, and oocyte in vitro maturation (IVM); and (3) rare utilization of neoadjuvant cytoprotective pharmacotherapy, artificial ovary, in vitro spermatogenesis, and stem cell reproductive technology as they are still in preclinical or early clinical research settings. Proper technical and ethical concerns should be considered when offering advanced and experimental oncofertility options to patients. Dissemination of our study results and recommendations will provide efficient oncofertility edification and modeling to oncofertility teams and related healthcare providers around the globe and help them offer the best care possible to their patients.

**Acknowledgments** Collaborators of Practice Committee of the Oncofertility Consortium

Mahmoud Salama (Oncofertility Consortium, Feinberg School of Medicine, Northwestern University, Chicago, IL 60611, USA; mahmoud.salama@northwestern.edu, eaims\_gm@yahoo.com),

Monica M. Laronda (Ann & Robert H. Lurie Children’s Hospital of Chicago, 225 East Chicago Ave, Box 63, Chicago IL, 60611, USA; mlaronda@northwestern.edu)

Erin Rowell (Ann & Robert H. Lurie Children's Hospital of Chicago, 225 East Chicago Ave, Box 63, Chicago IL, 60611, USA; erowell@luriechildrens.org)

Laura Erickson (Ann & Robert H. Lurie Children's Hospital of Chicago, 225 East Chicago Ave, Box 63, Chicago IL, 60611, USA; lerickson@luriechildrens.org)

Kara Goldman (Oncofertility Consortium, Feinberg School of Medicine, Northwestern University, Chicago, IL 60611, USA; kara.goldman@nm.org)

Kristin Smith (Oncofertility Consortium, Feinberg School of Medicine, Northwestern University, Chicago, IL 60611, USA; ksmith@nm.org)

MaryEllen Pavone (Oncofertility Consortium, Feinberg School of Medicine, Northwestern University, Chicago, IL 60611, USA; MaryEllen.Pavone@nm.org)

Francesca E. Duncan (Oncofertility Consortium, Feinberg School of Medicine, Northwestern University, Chicago, IL 60611, USA; f-duncan@northwestern.edu)

Robert Brannigan (Oncofertility Consortium, Feinberg School of Medicine, Northwestern University, Chicago, IL 60611, USA; robert.brannigan@nm.org)

Lauren Ataman-Millhouse (Oncofertility Consortium, Feinberg School of Medicine, Northwestern University, Chicago, IL 60611, USA; lauren.ataman@northwestern.edu)

Pasquale Patrizio (Yale Fertility Center and Yale Fertility Preservation program, 200 West Campus Dr., Orange, CT 06477, USA; pasquale.patrizio@yale.edu)

Kenny A. Rodriguez-Wallberg (Karolinska Institutet, Department of Oncology-Pathology and Karolinska University Hospital, Department of Reproductive Medicine, Division of Gynecology and Reproduction, SE-14186, Stockholm, Sweden; kenny.rodiguez-wallberg@ki.se)

Yuki Okutsu-Horaguchi (Department of Obstetrics and Gynecology, St. Marianna University School of Medicine, 2-16-1, Sugao, Miyamae-ku, Kawasaki, Kanagawa, Japan; y2okutsu@marianna-u.ac.jp)

Nao Suzuki (Department of Obstetrics and Gynecology, St. Marianna University School of Medicine, 2-16-1, Sugao, Miyamae-ku, Kawasaki, Kanagawa, Japan; nao@marianna-u.ac.jp)

Matteo Lambertini (Department of Medical Oncology, UOC Clinica di Oncologia Medica, IRCCS Ospedale Policlinico San Martino, Genova, Italy; Department of Internal Medicine and Medical Specialties (DiMI), School of Medicine, University of Genova, Genova, Italy; matteo.lambertini@unige.it)

Cathryn (Kate) Stern (Fertility Preservation Service, Reproductive Services Unit, Royal Women's Hospital, Parkville, 3051, Australia; Fertility Preservation Service, Melbourne IVF, East Melbourne, 3002, Australia; Kate.stern@mivf.com.au)

Veronica Gomez-Lobo (Children's National Hospital, 111 Michigan Avenue NW, Washington, DC 20010, USA. (ZIA# HD008985); Veronica.gomez-lobo@nih.gov)

Jacqueline Y. Maher (Children's National Hospital, 111 Michigan Avenue NW, Washington, DC 20010, USA. (ZIA# HD008985); Jacqueline.maher@nih.gov)

Michael H. Hsieh (Children's National Hospital, 111 Michigan Avenue NW, Washington, DC 20010, USA. (ZIA# HD008985); mhhsieh@childrensnational.org)

Molly B. Moravek (Center for Reproductive Medicine, Michigan Medicine, 475 Market Place, Building 1, Suite B, Ann Arbor, MI 48108, USA; mpenderg@med.umich.edu)

Antoinette Anazodo (Fertility Research Centre, Royal Hospital for Women, Barker Street, Sydney, Australia; Antoinette.anazodo@health.nsw.gov.au)

Lynn M. Westphal (Stanford University Medical Center, 300 Pasteur Drive, Stanford, CA, USA; lynnw@stanford.edu)

Richard A. Anderson (University of Edinburgh, Edinburgh, UK; Royal Infirmary of Edinburgh and Royal Hospital for Children and Young People, Little France Crescent, Edinburgh, UK; Richard.anderson@ed.ac.uk)

W. Hamish Wallace (University of Edinburgh, Edinburgh, UK; Royal Infirmary of Edinburgh and Royal Hospital for Children and Young People, Little France Crescent, Edinburgh, UK; hamish.wallace@nhs.net)

Rod T. Mitchell (University of Edinburgh, Edinburgh, UK; Royal Infirmary of Edinburgh and Royal Hospital for Children and Young People, Little France Crescent, Edinburgh, UK; Rod.Mitchell@ed.ac.uk)

Leena Nahata (Nationwide Children's Hospital, 700 Children's Dr., Columbus, OH 43205, USA; Leena.nahata@nationwidechildrens.org)

Stacy Whiteside (Nationwide Children's Hospital, 700 Children's Dr., Columbus, OH 43205, USA; Stacy.whiteside@nationwidechildrens.org)

Suneeta Senapati (University of Pennsylvania, Division of Reproductive Endocrinology & Infertility, 3701 Market Street, Suite 8000, Philadelphia, PA 19104, USA; suneeta.senapati@pennmedicine.upenn.edu)

Divya K. Shah (University of Pennsylvania, Division of Reproductive Endocrinology & Infertility, 3701 Market Street, Suite 8000, Philadelphia, PA 19104, USA; divya.shah@pennmedicine.upenn.edu)

Clarisa Gracia (University of Pennsylvania, Division of Reproductive Endocrinology & Infertility, 3701 Market Street, Suite 8000, Philadelphia, PA 19104, USA; clarisa.gracia@pennmedicine.upenn.edu)

M. Elizabeth Fino (New York University, NYU Langone Fertility Center, 660 First Ave, 5th Floor, New York, NY 10016, USA; Mary.Fino@nyulangone.org)

Jennifer K. Blakemore (New York University, NYU Langone Fertility Center, 660 First Ave, 5th Floor, New York, NY 10016, USA; Jennifer.Blakemore@nyulangone.org)

Gwendolyn P. Quinn (New York University, NYU Langone Fertility Center, 660 First Ave, 5th Floor, New York, NY 10016, USA; Gwendolyn.Quinn@nyulangone.org)

Jan-Steffen Krüssel (UniKiD - Center for Reproductive Medicine, UniCareD - Center for Fertility Preservation, Düsseldorf University Hospital, Moorenstrasse 5, D-40225 Düsseldorf, Germany; kruessel@unikid.de)

Dunja-Maria Baston-Büst (UniKiD - Center for Reproductive Medicine, UniCareD - Center for Fertility Preservation, Düsseldorf University Hospital, Moorenstrasse 5, D-40225 Düsseldorf, Germany; baston-buest@unikid.de)

Jana Liebenthron (UniKiD - Center for Reproductive Medicine, UniCareD - Center for Fertility Preservation, Düsseldorf University Hospital, Moorenstrasse 5, D-40225 Düsseldorf, Germany; jana.liebenthron@unicared.de)

Claus Yding Andersen (Laboratory of Reproductive Biology, Juliane Marie Centre for Women, Children and Reproduction, University Hospital of Copenhagen, Blegdamsvej 9, DK-2100 Copenhagen, Denmark; yding@rh.dk)

Stine Gry Kristensen (Laboratory of Reproductive Biology, Juliane Marie Centre for Women, Children and Reproduction, University Hospital of Copenhagen, Blegdamsvej 9, DK-2100 Copenhagen, Denmark; Stine.Gry.Kristensen@regionh.dk)

Linn Salto Mamsen (Laboratory of Reproductive Biology, Juliane Marie Centre for Women, Children and Reproduction, University Hospital of Copenhagen, Blegdamsvej 9, DK-2100 Copenhagen, Denmark; linn.salto.mamsen@regionh.dk)

Yasmin Jayasinghe (Fertility Preservation Service, The Royal Children's Hospital, Flemington Rd, Parkville, Melbourne, Vic 3054, Australia; Yasmin.jayasinghe@unimelb.edu.au)

H. Irene Su (University of California, San Diego, 3855 Health Sciences Drive, La Jolla, CA 92039-0901, USA; hisu@health.ucsd.edu)

Marie-Madeleine Dolmans (Cliniques Universitaires Saint Luc, Université Catholique de Louvain, Avenue Hippocrate, 10, 1200 Brussels, Belgium; marie-madeleine.dolmans@uclouvain.be)

Christiani A. Amorim (Université Catholique de Louvain, Avenue Mounier 52, 1200 Brussels, Belgium; christiani.amorim@uclouvain.be)

Isabelle Demeestere (Fertility Clinic and Research Laboratory on Human Reproduction, CUB-Erasme Hospital, Université Libre de Bruxelles (ULB), 808 route de Lennik, 1070 Brussels, Belgium; idemeest@ulb.ac.be)

Michel De Vos (Centre for Reproductive Medicine of UZ Brussel, Laarbeeklaan 101, 1090 Brussels, Belgium; Michel.devos@uzbrussel.be)

Ellen Van Moer (Centre for Reproductive Medicine of UZ Brussel, Laarbeeklaan 101, 1090 Brussels, Belgium; Ellen.vanmoer@uzbrussel.be)

Vladimir Isachenko (Gynecological Endocrinology and Reproductive Medicine Division, Obstetrics and Gynecology Department, Cologne University Hospital, Cologne, Germany; vladimir.isachenko@uk-koeln.de)

Evgenia Isachenko (Gynecological Endocrinology and Reproductive Medicine Division, Obstetrics and Gynecology Department, Cologne University Hospital, Cologne, Germany; evgenia.isachenko@uk-koeln.de)

Peter Mallmann (Gynecological Endocrinology and Reproductive Medicine Division, Obstetrics and Gynecology Department, Cologne University Hospital, Cologne, Germany; peter.mallmann@uk-koeln.de)

Gohar Rahimi (Gynecological Endocrinology and Reproductive Medicine Division, Obstetrics and Gynecology Department, Cologne University Hospital, Cologne, Germany; gohar.rahimi@uk-koeln.de)

Hanna Valli-Pulaski (Center for Reproduction and Transplantation, Magee-Womens Hospital, University of Pittsburgh Medical Center, 300 Halket Street, Pittsburgh, PA 15213, USA; vallih2@mwri.magee.edu)

Sarah R. Steimer (Center for Reproduction and Transplantation, Magee-Womens Hospital, University of Pittsburgh Medical Center, 300 Halket Street, Pittsburgh, PA 15213, USA; steimers2@mwri.magee.edu)

Katherine V. McMahon (Center for Reproduction and Transplantation, Magee-Womens Hospital, University of Pittsburgh Medical Center, 300 Halket Street, Pittsburgh, PA 15213, USA; samskv@upmc.edu)

Kyle E. Orwig (Center for Reproduction and Transplantation, Magee-Womens Hospital, University of Pittsburgh Medical Center, 300 Halket Street, Pittsburgh, PA 15213, USA; orwigke@upmc.edu)

Julie Sroga Rios (University of Cincinnati, Department of Obstetrics and Gynecology, Division for REI, Cincinnati, OH 45229, USA; Cincinnati Children's Hospital Medical Center, Division of Pediatric Adolescent Gynecology Pediatric, Cincinnati, OH 45229, USA; Julie.rios@cchmc.org)

James F. Smith (Urology Department, UCSF Medical Center, University of California, San Francisco, CA 94143, USA; James.smith@ucsf.edu)

Evelyn Mok-Lin (Obstetrics and Gynecology Department, UCSF Medical Center, University of California, San Francisco, CA 94143, USA; Evelyn.Mok-Lin@ucsf.edu)

Teresa K. Woodruff (Oncofertility Consortium, Feinberg School of Medicine, Northwestern University, Chicago, IL 60611, USA; tkw@northwestern.edu, TeresaWoodruff1989@alum.northwestern.edu).

**Funding** This study received support from Northwestern University institutional funds from The Thomas J. Watkins Professor of Obstetrics and Gynecology.

## Compliance with ethical standards

**Conflict of interest** Matteo Lambertini acted as a consultant for Roche and Novartis, and received honoraria from Theramex, Roche, Novartis, Takeda, Pfizer, and Lilly outside the submitted work. Yasmin Jayasinghe has received educational funds from Merck outside the submitted work. The other collaborators have declared no conflicts of interest.

## References

- Oktay K, Harvey BE, Partridge AH, Quinn GP, Reinecke J, Taylor HS, et al. Fertility preservation in patients with cancer: ASCO clinical practice guideline update. *J Clin Oncol*. 2018;36(19):1994–2001.
- Practice Committee of the American Society for Reproductive Medicine (ASRM). Fertility preservation in patients undergoing gonadotoxic therapy or gonadectomy: a committee opinion. *Fertil Steril*. 2019;112(6):1022–33.
- Oncofertility Consortium - Northwestern University [Internet]. [cited 2020 Aug 1]. Available from: <<http://oncofertility.northwestern.edu/>>.
- Oncofertility Professional Engagement Network (OPEN) - Northwestern University [Internet]. [cited 2020 Aug 1]. Available from: <<http://oncofertility.northwestern.edu/oncofertility-professional-engagement-network/>>.
- Ataman LM, Rodrigues JK, Marinho RM, Caetano JP, Chehin MB, Alves da Motta EL, et al. Creating a global community of practice for oncofertility. *J Glob Oncol*. 2016;2(2):83–96.
- Rashedi A, de Roo SF, Ataman L, et al. A survey of fertility preservation options available to cancer patients around the globe. *J Glob Oncol*. 2018;4:1–16.
- Rashedi A, de Roo SF, Ataman L, Edmonds ME, Silva AA, Scarella A, et al. A survey of third-party parenting options associated with fertility preservation available to patients with cancer around the globe. *J Glob Oncol*. 2018;4:1–7.
- Salama M, Ataman L, Taha T, et al. Building oncofertility core competency in developing countries: experience from Egypt, Tunisia, Brazil, Peru, and Panama. *J Glob Oncol*. 2018;4:1–11.
- Salama M, Ataman-Millhouse L, Sobral F, Terrado G, Scarella A, Bourlon MT, et al. Barriers and opportunities of oncofertility practice in nine developing countries and the emerging oncofertility professional engagement network. *J Glob Oncol*. 2018;4:1–7.
- Salama M, Ataman-Millhouse L, Braham M, Berjeb K, Khrouf M, Rodrigues JK, et al. Installing oncofertility programs for common cancers in limited resource settings (Repro-Can-OPEN Study): an extrapolation during the global crisis of Coronavirus (COVID-19) pandemic. *J Assist Reprod Genet*. 2020;37(7):1567–77.
- McDougall R, Gillam L, Delany C, Jayasinghe Y. The ethics of fertility preservation for prepubertal children: should clinicians offer procedures where efficacy is largely unproven? *J Med Ethics*. 2018;44(1):27–31.
- Allan S, Gook D, Jayasinghe Y. The impact of the law in helping or hindering fertility preservation for children with cancer facing gonadotoxic therapies. *Journal of Law and Medicine*. 2018;26(2):322–33.
- Anazodo A, Laws P, Logan S, Saunders C, Travaglia J, Gerstl B, et al. How can we improve oncofertility care for patients? A systematic scoping review of current international practice and models of care. *Hum Reprod Update*. 2019;25(2):159–79.
- Anazodo A, Laws P, Logan S, Saunders C, Travaglia J, Gerstl B, et al. The development of an international oncofertility competency framework: a model to increase oncofertility implementation. *Oncologist*. 2019;24:e1450–9.
- Salama M, Woodruff TK. Anticancer treatments and female fertility: clinical concerns and role of oncologists in oncofertility practice. *Expert Rev Anticancer Ther*. 2017;17(8):687–92.
- Nahata L, Anazodo A, Cherven B, et al. Optimizing health literacy to facilitate reproductive health decision-making in adolescent and young adults with cancer [published online ahead of print, 2020 Jul 6]. *Pediatr Blood Cancer*. 2020:e28476.
- Saraf AJ, Stanek J, Audino A, DaJusta D, Hansen-Moore J, McCracken K, et al. Examining predictors and outcomes of fertility consults among children, adolescents, and young adults with cancer. *Pediatr Blood Cancer*. 2018;65(12):e27409.
- Demeestere I, Ferster A. Fertility preservation counselling for childhood cancer survivors. *Lancet Oncol*. 2020;21(3):329–30. [https://doi.org/10.1016/S1470-2045\(20\)30065-6](https://doi.org/10.1016/S1470-2045(20)30065-6).

19. Peccatori FA, Azim HA Jr, Orecchia R, Hoekstra HJ, Pavlidis N, Kesic V, et al. Cancer, pregnancy and fertility: ESMO Clinical Practice Guidelines for diagnosis, treatment and follow-up. *Ann Oncol*. 2013;24 Suppl 6:vi160–70.
20. Loren AW, Mangu PB, Beck LN, Brennan L, Magdalinski AJ, Partridge AH, et al. Fertility preservation for patients with cancer: American Society of Clinical Oncology clinical practice guideline update. *J Clin Oncol*. 2013;31(19):2500–10.
21. Practice Committee of American Society for Reproductive Medicine. Fertility preservation in patients undergoing gonadotoxic therapy or gonadectomy: a committee opinion. *Fertil Steril*. 2013;100(5):1214–23.
22. Ethics Committee of American Society for Reproductive Medicine. Fertility preservation and reproduction in patients facing gonadotoxic therapies: a committee opinion. *Fertil Steril*. 2013;100(5):1224–31.
23. Martinez F. Update on fertility preservation from the Barcelona International Society for Fertility Preservation-ESHRE-ASRM 2015 expert meeting: indications, results and future perspectives. *Hum Reprod*. 2017;32(9):1802–11.
24. Coccia PF, Pappo AS, Beaupin L, Borges VF, Borinstein SC, Chugh R, et al. Adolescent and young adult oncology, Version 2.2018, NCCN Clinical Practice Guidelines in Oncology. *J Natl Compr Canc Netw*. 2018;16(1):66–97.
25. Donnez J, Dolmans MM. Fertility preservation in women. *N Engl J Med*. 2017;377(17):1657–65.
26. Schüring AN, Fehm T, Behringer K, Goeckenjan M, Wimberger P, Henes M, et al. Practical recommendations for fertility preservation in women by the FertiPROTEKT network. Part I: Indications for fertility preservation. *Arch Gynecol Obstet*. 2018;297(1):241–55.
27. von Wolff M, Germeyer A, Liebenthron J, Korell M, Nawroth F. Practical recommendations for fertility preservation in women by the FertiPROTEKT network. Part II: fertility preservation techniques. *Arch Gynecol Obstet*. 2018;297(1):257–67.
28. von Wolff M, Andersen CY, Woodruff TK, Nawroth F. FertiPROTEKT, Oncofertility Consortium and the Danish Fertility-Preservation Networks-what can we learn from their experiences? *Clin Med Insights Reprod Health*. 2019;13:1179558119845865.
29. Van der Ven H, Liebenthron J, Beckmann M, et al. Ninety-five orthotopic transplantations in 74 women of ovarian tissue after cytotoxic treatment in a fertility preservation network: tissue activity, pregnancy and delivery rates. *Hum Reprod*. 2016;31(9):2031–41.
30. Dittrich R, Kliesch S, Schüring A, Balcerk M, Baston-Büst DM, Beck R, et al. Fertility preservation for patients with malignant disease. Guideline of the DGGG, DGU and DGRM (S2k-Level, AWMF Registry No. 015/082, November 2017) - Recommendations and Statements for Girls and Women. *Geburtshilfe Frauenheilkd*. 2018;78(6):567–84.
31. Lotz L, Dittrich R, Hoffmann I, Beckmann MW. Ovarian tissue transplantation: experience from Germany and worldwide efficacy. *Clin Med Insights Reprod Health*. 2019;13:1179558119867357.
32. Rodriguez-Wallberg KA, Tanbo T, Tinkanen H, Thurin-Kjellberg A, Nedstrand E, Kitlinski ML, et al. Ovarian tissue cryopreservation and transplantation among alternatives for fertility preservation in the Nordic countries-compilation of 20 years of multicenter experience. *Acta Obstet Gynecol Scand*. 2016;95(9):1015–26.
33. Rodriguez-Wallberg KA, Marklund A, Lundberg F, Wikander I, Milenkovic M, Anastacio A, et al. A prospective study of women and girls undergoing fertility preservation due to oncologic and non-oncologic indications in Sweden-Trends in patients' choices and benefit of the chosen methods after long-term follow up. *Acta Obstet Gynecol Scand*. 2019;98(5):604–15.
34. Rodriguez-Wallberg KA, Borgström B, Petersen C, Thurin-Kjellberg A, Mörse H, Giwercman A, et al. National guidelines and multilingual age-adapted patient brochures and videos as decision aids for fertility preservation (FP) of children and teenagers with cancer-a multidisciplinary effort to improve children's information and access to FP in Sweden. *Acta Obstet Gynecol Scand*. 2019;98(5):679–80.
35. Gellert SE, Pors SE, Kristensen SG, Bay-Björn AM, Ernst E, Yding AC. Transplantation of frozen-thawed ovarian tissue: an update on worldwide activity published in peer-reviewed papers and on the Danish cohort. *J Assist Reprod Genet*. 2018;35(4):561–70.
36. Salama M, Isachenko V, Isachenko E, Rahimi G, Mallmann P. Updates in preserving reproductive potential of prepubertal girls with cancer: systematic review. *Crit Rev Oncol Hematol*. 2016;103:10–21.
37. Nahata L, Woodruff TK, Quinn GP, Meacham LR, Chen D, Appiah LC, et al. Ovarian tissue cryopreservation as standard of care: what does this mean for pediatric populations? *J Assist Reprod Genet*. 2020;37(6):1323–6.
38. Salama M, Woodruff TK. New advances in ovarian autotransplantation to restore fertility in cancer patients. *Cancer Metastasis Rev*. 2015;34(4):807–22.
39. Corkum KS, Rhee DS, Wafford QE, Demeestere I, Dasgupta R, Baertschiger R, et al. Fertility and hormone preservation and restoration for female children and adolescents receiving gonadotoxic cancer treatments: a systematic review. *J Pediatr Surg*. 2019;54(11):2200–9.
40. Stukenborg JB, Wyns C. Fertility sparing strategies for pre- and peripubertal male cancer patients. *Ecancermedicalscience*. 2020;14:1016.
41. Borgström B, Fridström M, Gustafsson B, Ljungman P, Rodriguez-Wallberg KA. A prospective study on the long-term outcome of prepubertal and pubertal boys undergoing testicular biopsy for fertility preservation prior to hematologic stem cell transplantation. *Pediatr Blood Cancer*. 2020;67:e28507.
42. Ho WLC, Boume H, Gook D, Clarke G, Kemertzis M, Stern K, et al. A short report on current fertility preservation strategies for boys. *Clin Endocrinol (Oxf)*. 2017;87(3):279–85.
43. Jayasinghe Y, Wallace W, Anderson R. Ovarian function, fertility and reproductive lifespan in cancer patients. *Expert Endocrinol Reviews*. 2018;13(3):125–36.
44. Greve T, Clasen-Linde E, Andersen MT, Andersen MK, Sørensen SD, Rosendahl M, et al. Cryopreserved ovarian cortex from patients with leukemia in complete remission contains no apparent viable malignant cells. *Blood*. 2012;120(22):4311–6.
45. Diaz-García C, Herraiz S, Such E, Andrés MDM, Villamón E, Mayordomo-Aranda E, et al. Dexamethasone does not prevent malignant cell reintroduction in leukemia patients undergoing ovarian transplant: risk assessment of leukemic cell transmission by a xenograft model. *Hum Reprod*. 2019;34(8):1485–93.
46. Shapira M, Raanani H, Barshack I, Amariglio N, Derech-Haim S, Marciano MN, et al. First delivery in a leukemia survivor after transplantation of cryopreserved ovarian tissue, evaluated for leukemia cells contamination. *Fertil Steril*. 2018;109(1):48–53.
47. Sonmezer M, Ozkavukcu S, Sukur YE, Kankaya D, Arslan O. First pregnancy and live birth in Turkey following frozen-thawed ovarian tissue transplantation in a patient with acute lymphoblastic leukemia who underwent cord blood transplantation. *J Assist Reprod Genet*. 2020. <https://doi.org/10.1007/s10815-020-01850-2>.
48. Kuchenbaecker KB, Hopper JL, Barnes DR, Phillips KA, Mooij TM, Roos-Blom MJ, et al. Risks of breast, ovarian, and contralateral breast cancer for BRCA1 and BRCA2 mutation carriers. *JAMA*. 2017;317(23):2402–16.
49. Klemp JR, Kim SS, ISFP Practice Committee. Fertility preservation in young women with breast cancer. *J Assist Reprod Genet*. 2012;29(6):469–72.
50. Lambertini M, Goldrat O, Ferreira AR, Dechene J, Azim Jr HA, Desir J, et al. Reproductive potential and performance of fertility

- preservation strategies in BRCA-mutated breast cancer patients. *Ann Oncol.* 2018;29(1):237–43.
51. Lambertini M, Goldrat O, Toss A, Azim HA Jr, Peccatori FA, Ignatiadis M, et al. Fertility and pregnancy issues in BRCA-mutated breast cancer patients. *Cancer Treat Rev.* 2017;59:61–70.
  52. Rodriguez-Wallberg KA, Oktay K. Fertility preservation and pregnancy in women with and without BRCA mutation-positive breast cancer. *Oncologist.* 2012;17(11):1409–17.
  53. Lambertini M, Di Maio M, Poggio F, et al. Knowledge, attitudes and practice of physicians towards fertility and pregnancy-related issues in young BRCA-mutated breast cancer patients. *Reprod Biomed Online.* 2019;38(5):835–44.
  54. Kedem A, Yerushalmi GM, Brengauz M, Raanani H, Orvieto R, Hourvitz A, et al. Outcome of immature oocytes collection of 119 cancer patients during ovarian tissue harvesting for fertility preservation. *J Assist Reprod Genet.* 2018;35(5):851–6.
  55. Fasano G, Dechène J, Antonacci R, Biramane J, Vannin AS, van Langendonck A, et al. Outcomes of immature oocytes collected from ovarian tissue for cryopreservation in adult and prepubertal patients. *Reprod Biomed Online.* 2017;34(6):575–82.
  56. Pereira N, Hubschmann AG, Lekovich JP, Schattman GL, Rosenwaks Z. Ex vivo retrieval and cryopreservation of oocytes from oophorectomized specimens for fertility preservation in a BRCA1 mutation carrier with ovarian cancer. *Fertil Steril.* 2017;108(2):357–60.
  57. Donnez J, Dolmans MM. Preservation of fertility in females with haematological malignancy. *Br J Haematol.* 2011;154(2):175–84.
  58. Jadoul P, Kim SS, ISFP Practice Committee. Fertility considerations in young women with hematological malignancies. *J Assist Reprod Genet.* 2012;29(6):479–87.
  59. Salama M, Anazodo A, Woodruff TK. Preserving fertility in female patients with hematological malignancies: a multidisciplinary oncofertility approach. *Ann Oncol.* 2019;30(11):1760–75.
  60. Laronda MM, Rutz AL, Xiao S, Whelan KA, Duncan FE, Roth EW, et al. A bioprosthetic ovary created using 3D printed microporous scaffolds restores ovarian function in sterilized mice. *Nat Commun.* 2017;8:15261.
  61. Xiao S, Coppeta JR, Rogers HB, Isenberg BC, Zhu J, Olalekan SA, et al. A microfluidic culture model of the human reproductive tract and 28-day menstrual cycle. *Nat Commun.* 2017;8:14584.
  62. Jakus AE, Laronda MM, Rashedi AS, Robinson CM, Lee C, Jordan SW, et al. “Tissue papers” from organ-specific decellularized extracellular matrices. *Adv Funct Mater.* 2017;27(3):1700992.
  63. Salama M, Woodruff TK. From bench to bedside: current developments and future possibilities of artificial human ovary to restore fertility. *Acta Obstet Gynecol Scand.* 2019;98(5):659–64.
  64. Hermann BP, Sukhwani M, Winkler F, Pascarella JN, Peters KA, Sheng Y, et al. Spermatogonial stem cell transplantation into rhesus testes regenerates spermatogenesis producing functional sperm. *Cell Stem Cell.* 2012;11(5):715–26.
  65. Fayomi AP, Peters K, Sukhwani M, Valli-Pulaski H, Shetty G, Meistrich ML, et al. Autologous grafting of cryopreserved prepubertal rhesus testis produces sperm and offspring. *Science.* 2019;363(6433):1314–9.

**Publisher's note** Springer Nature remains neutral with regard to jurisdictional claims in published maps and institutional affiliations.

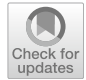

# Installing oncofertility programs for breast cancer in limited versus optimum resource settings: Empirical data from 39 surveyed centers in Repro-Can-OPEN Study Part I & II

Mahmoud Salama<sup>1</sup> · M. Lambertini<sup>2,3</sup> · MS Christianson<sup>4</sup> · Y. Jayasinghe<sup>5,6</sup> · A. Anazodo<sup>7</sup> · M. De Vos<sup>8</sup> · F. Amant<sup>9,10</sup> · C. Stern<sup>11,12</sup> · L. Appiah<sup>13</sup> · T. L. Woodard<sup>14</sup> · R. A. Anderson<sup>15</sup> · L. M. Westphal<sup>16</sup> · R. E. Leach<sup>1</sup> · K. A. Rodriguez-Wallberg<sup>17,18</sup> · P. Patrizio<sup>19</sup> · Teresa K. Woodruff<sup>1</sup>

Received: 1 September 2021 / Accepted: 5 January 2022 / Published online: 15 January 2022  
© The Author(s), under exclusive licence to Springer Science+Business Media, LLC, part of Springer Nature 2022

## Abstract

**Purpose** As a further step to elucidate the actual diverse spectrum of oncofertility practices for breast cancer around the globe, we present and discuss the comparisons of oncofertility practices for breast cancer in limited versus optimum resource settings based on data collected in the Repro-Can-OPEN Study Part I & II.

**Methods** We surveyed 39 oncofertility centers including 14 in limited resource settings from Africa, Asia & Latin America (Repro-Can-OPEN Study Part I), and 25 in optimum resource settings from the United States, Europe, Australia and Japan (Repro-Can-OPEN Study Part II). Survey questions covered the availability of fertility preservation and restoration options offered to young female patients with breast cancer as well as the degree of utilization.

**Results** In the Repro-Can-OPEN Study Part I & II, responses for breast cancer and calculated oncofertility scores showed the following characteristics: (1) higher oncofertility scores in optimum resource settings than in limited resource settings especially for established options, (2) frequent utilization of egg freezing, embryo freezing, ovarian tissue freezing, GnRH analogs, and fractionation of chemo- and radiotherapy, (3) promising utilization of oocyte in vitro maturation (IVM), (4) rare utilization of neoadjuvant cytoprotective pharmacotherapy, artificial ovary, and stem cells reproductive technology as they are still in preclinical or early clinical research settings, (5) recognition that technical and ethical concerns should be considered when offering advanced and innovative oncofertility options.

**Conclusions** We presented a plausible oncofertility best practice model to guide oncofertility teams in optimizing care for breast cancer patients in various resource settings.

**Keywords** Oncofertility · Breast cancer · Fertility preservation · Best practice · Limited resource settings · Optimum resource settings

## Introduction

Breast cancer is the most common cancer impacting women of reproductive age [1]. Contemporary breast cancer treatment often requires aggressive gonadotoxic therapies that necessitates fertility preservation treatments for those who desire future fertility. Young women with breast cancer

have a higher risk of carrying pathologic mutations in the *BRCA1* or *BRCA2* genes, adding further complexity to their oncofertility counseling [2]. According to the most recent international guidelines from the American Society of Clinical Oncology (ASCO) [3], the American Society for Reproductive Medicine (ASRM) [4], the European Society of Human Reproduction and Embryology (ESHRE) [5] and the European Society for Medical Oncology (ESMO) [6], several established, debatable, and experimental oncofertility options can be offered to young female patients with breast cancer to preserve and restore fertility. Established oncofertility options include embryo cryopreservation, oocyte cryopreservation, and recently ovarian tissue cryopreservation and autotransplantation. Debatable options

✉ Mahmoud Salama  
salamam2@msu.edu

✉ Teresa K. Woodruff  
tkw@msu.edu

Extended author information available on the last page of the article

for fertility preservation for breast cancer patients include GnRH analogs and hormonal suppression, fractionation of chemotherapy and radiotherapy. Experimental oncofertility options include oocyte in vitro maturation (IVM), artificial ovary, neoadjuvant cytoprotective pharmacotherapy, stem cell reproductive technology and others [3–6].

Despite recognition as official recommendations, oncofertility international guidelines face several challenges in practice. Over the past years, the Oncofertility Consortium has studied oncofertility practices in many countries within its Oncofertility Professional Engagement Network (OPEN) [7, 8]. Our previous studies identified a variety of standards and challenges in oncofertility practices worldwide [9–13]. Recently in our Repro-Can-OPEN Study Part I & II, we proposed installation of specific oncofertility programs for childhood, breast, and blood cancers in limited versus optimum resource settings. The main objectives of Repro-Can-OPEN Study Part I & II were to measure empirically the availability and degree of utilization of oncofertility options provided by the surveyed centers, to identify different styles of oncofertility practice for common cancers in limited and optimum resource settings, and to suggest best practice models for oncofertility care based on the results of the survey and the existing literature [14, 15].

Limited resource settings include the following criteria especially in low- and middle-income countries (Fig. 1): shortage of reproductive care services provided to young patients with cancer, lack of experienced oncofertility teams and necessary equipment, lack of national registries for in vitro fertilization (IVF) and/or cancer treatments, lack of awareness among providers and patients, cultural and religious constraints, partial or complete legal prohibition of third-party reproduction, lack of insurance coverage for IVF and/or cancer treatments resulting in high out-of-pocket costs for patients, and lack of funding to support oncofertility programs. Even in developed countries, a state of limited resource settings could be experienced where access is limited or in case of sudden national disasters when most of

public services including healthcare are negatively affected as occurred recently during COVID-19 pandemic and its related economic shutdown. Additionally, within developed countries there may be specific regions that may qualify as limited resource [14].

Optimum resource settings include the following criteria especially in high-income countries (Fig. 1): availability of reproductive care services provided to young patients with cancer, availability of experienced oncofertility teams and necessary equipment, presence of national registries for IVF and cancer treatments, awareness among providers and patients, minimal cultural or religious constraints, legally allowed third-party reproduction, insurance coverage for IVF and cancer treatments, and availability of funding to support oncofertility programs [15].

As a further step to reflect the actual diverse spectrum of oncofertility practices for breast cancer around the globe and to help provide a plausible oncofertility best practice model, this study sought to compare oncofertility practices for breast cancer in limited versus optimum resource settings according to data reported in the Repro-Can-OPEN Study Part I & II.

## Methods

The Oncofertility Consortium sent the Repro-Can-OPEN Study questionnaire via email to 39 oncofertility centers in total; 14 oncofertility centers with limited resource settings from Africa, Asia & Latin America in Repro-Can-OPEN Study Part I, and 25 oncofertility centers with optimum resource settings from the United States, Europe, Australia and Japan in Repro-Can-OPEN Study Part II (Table 1). The Repro-Can-OPEN Study questionnaire included questions on the availability of fertility preservation options provided to young female patients with breast cancer in their reproductive years (age < 40 yr.), and whether these options are always, commonly, occasionally or rarely used. Responses

**Fig. 1** Limited versus optimum resource settings affecting oncofertility practice on national (grey) and local (white) levels

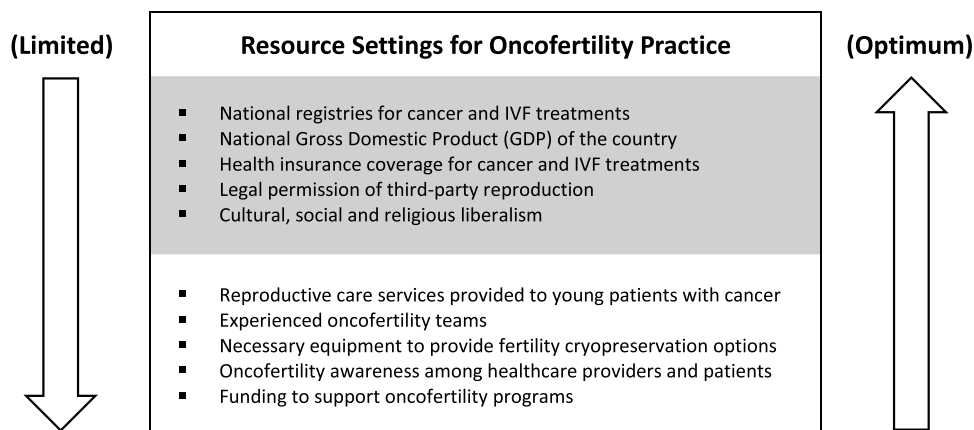

**Table 1** The 39 Surveyed Oncofertility Centers in Repro-Can-OPEN Study Part I & II

| Surveyed Oncofertility Centers with Limited Resource Settings (Repro-Can-OPEN Study Part I): ( <i>n</i> = 14)  |                                                                                                                                                                                                                                                                                                                                                                                                                                                                     |
|----------------------------------------------------------------------------------------------------------------|---------------------------------------------------------------------------------------------------------------------------------------------------------------------------------------------------------------------------------------------------------------------------------------------------------------------------------------------------------------------------------------------------------------------------------------------------------------------|
| 1                                                                                                              | National Research Center, Cairo, Egypt                                                                                                                                                                                                                                                                                                                                                                                                                              |
| 2                                                                                                              | Aziza Othmana Hospital of Tunis, Tunisia<br>FERTILLA, Clinique la Rose, Tunis, Tunisia                                                                                                                                                                                                                                                                                                                                                                              |
| 3                                                                                                              | Universidade Federal de Minas Gerais, Belo Horizonte, Minas Gerais, Brazil                                                                                                                                                                                                                                                                                                                                                                                          |
| 4                                                                                                              | Laboratorio de Biología Reproductiva y Preservación de la Fertilidad, Laboratorios de Investigación y Desarrollo, Universidad Peruana Cayetano Heredia, Lima, Peru<br>Unidad de Oncología Pediátrica, Hospital Edgardo Rebagliati Martins, Lima, Peru                                                                                                                                                                                                               |
| 5                                                                                                              | Panama Fertility, Sistema Nacional de Investigadores, Panama City, Panama                                                                                                                                                                                                                                                                                                                                                                                           |
| 6                                                                                                              | Pregna Medicina Reproductiva, Buenos Aires, Argentina<br>Hospital de Niños Ricardo Gutierrez, Buenos Aires, Argentina<br>Procreate, Buenos Aires, Argentina<br>Hospital de Niños Victor J. Vilela. Rosario, Santa Fe, Argentina                                                                                                                                                                                                                                     |
| 7                                                                                                              | Centro de Reproduccion Humana, Facultad de Medicina, Universidad de Valparaiso, Valparaiso, Chile                                                                                                                                                                                                                                                                                                                                                                   |
| 8                                                                                                              | Instituto Nacional de Ciencias Médicas y Nutrición Salvador Zubirán, Mexico City, Mexico                                                                                                                                                                                                                                                                                                                                                                            |
| 9                                                                                                              | Fertility Preservation Centre, Department of Clinical Embryology, Kasturba Medical College, Manipal Academy of Higher Education, Manipal, India<br>Department of Medical Oncology, Kasturba Medical College, Manipal Academy of Higher Education, Manipal, India<br>Mother and Child Hospital, New Delhi, India<br>Dr. Patil's Fertility and Endoscopy Clinic, Bangalore, India<br>Hospital Institute of Medical Sciences & SRCC children's Hospital, Mumbai, India |
| 10                                                                                                             | Vitalab Fertility Centre, Johannesburg, South Africa<br>Department Medical Oncology, University of Witwatersrand, Johannesburg, South Africa<br>Charlotte Maxeke Johannesburg Academic Hospital, Johannesburg, South Africa                                                                                                                                                                                                                                         |
| 11                                                                                                             | Instituto Nacional de Cancerología, Bogota, Colombia<br>FERTIVIDA Fertility Center, Bogota, Colombia                                                                                                                                                                                                                                                                                                                                                                |
| 12                                                                                                             | Instituto Guatemalteco de Seguridad Social (IGSS), Guatemala City, Guatemala                                                                                                                                                                                                                                                                                                                                                                                        |
| 13                                                                                                             | Thuriah Medical Center, Riyadh, Kingdom of Saudi Arabia                                                                                                                                                                                                                                                                                                                                                                                                             |
| 14                                                                                                             | The Oncology and Fertility Centres of Ekocorp Plc, Eko Hospitals, Lagos, Nigeria<br>Kingswill Specialist Hospital, Lagos, Nigeria                                                                                                                                                                                                                                                                                                                                   |
| Surveyed Oncofertility Centers with Optimum Resource Settings (Repro-Can-OPEN Study Part II): ( <i>n</i> = 25) |                                                                                                                                                                                                                                                                                                                                                                                                                                                                     |
| 1                                                                                                              | Oncofertility Consortium, Feinberg School of Medicine, Northwestern University, Chicago, IL 60,611, USA<br>Ann & Robert H. Lurie Children's Hospital of Chicago, 225 East Chicago Ave, Box 63, Chicago IL, 60,611, USA                                                                                                                                                                                                                                              |
| 2                                                                                                              | Yale Fertility Center and Yale Fertility Preservation program, 200 West Campus Dr., Orange, CT 06,477, USA                                                                                                                                                                                                                                                                                                                                                          |
| 3                                                                                                              | Karolinska Institutet, Department of Oncology-Pathology and Karolinska University Hospital, Department of Reproductive Medicine, Division of Gynecology and Reproduction, SE-14186, Stockholm, Sweden                                                                                                                                                                                                                                                               |
| 4                                                                                                              | Department of Obstetrics and Gynecology, St. Marianna University School of Medicine, 2-16-1, Sugao, Miyamae-ku, Kawasaki, Kanagawa, Japan                                                                                                                                                                                                                                                                                                                           |
| 5                                                                                                              | Department of Medical Oncology, UOC Clinica di Oncologia Medica, IRCCS Ospedale Policlinico San Martino, Genova, Italy<br>Department of Internal Medicine and Medical Specialties (DiMI), School of Medicine, University of Genova, Genova, Italy                                                                                                                                                                                                                   |
| 6                                                                                                              | Fertility Preservation Service, Reproductive Services Unit, Royal Women's Hospital, Parkville, 3051, Australia<br>Fertility Preservation Service, Melbourne IVF, East Melbourne, 3002, Australia                                                                                                                                                                                                                                                                    |
| 7                                                                                                              | Children's National Hospital, 111 Michigan Avenue NW, Washington, DC 20,010, USA. (ZIA# HD008985)                                                                                                                                                                                                                                                                                                                                                                   |
| 8                                                                                                              | Center for Reproductive Medicine, Michigan Medicine, 475 Market Place, Building 1, Suite B, Ann Arbor, MI 48,108, USA                                                                                                                                                                                                                                                                                                                                               |



**Table 1** (continued)Surveyed Oncofertility Centers with Limited Resource Settings (Repro-Can-OPEN Study Part I): (*n* = 14)

|    |                                                                                                                                                                                                                                                     |
|----|-----------------------------------------------------------------------------------------------------------------------------------------------------------------------------------------------------------------------------------------------------|
| 9  | Fertility Research Centre, Royal Hospital for Women, Barker Street, Sydney, Australia                                                                                                                                                               |
| 10 | Stanford University Medical Center, 300 Pasteur Drive, Stanford, CA, USA                                                                                                                                                                            |
| 11 | University of Edinburgh, Edinburgh, UK<br>Royal Infirmary of Edinburgh and Royal Hospital for Children and Young People, Little France Crescent, Edinburgh, UK                                                                                      |
| 12 | Nationwide Children's Hospital, 700 Children's Dr., Columbus, OH 43,205, USA                                                                                                                                                                        |
| 13 | University of Pennsylvania, Division of Reproductive Endocrinology & Infertility, 3701 Market Street, Suite 8000, Philadelphia, PA 19,104, USA                                                                                                      |
| 14 | New York University, NYU Langone Fertility Center, 660 First Ave, 5th Floor, New York, NY 10,016, USA                                                                                                                                               |
| 15 | UniKiD—Center for Reproductive Medicine, UniCareD—Center for Fertility Preservation, Düsseldorf University Hospital, Moorenstrasse 5, D-40225 Düsseldorf, Germany                                                                                   |
| 16 | Laboratory of Reproductive Biology, Juliane Marie Centre for Women, Children and Reproduction, University Hospital of Copenhagen, Blegdamsvej 9, DK-2100 Copenhagen, Denmark                                                                        |
| 17 | Fertility Preservation Service, The Royal Children's Hospital, Flemington Rd, Parkville, Melbourne, Vic 3054, Australia                                                                                                                             |
| 18 | University of California, San Diego, 3855 Health Sciences Drive, La Jolla, CA 92,039–0901, USA                                                                                                                                                      |
| 19 | Cliniques Universitaires Saint Luc, Université Catholique de Louvain, Avenue Hippocrate, 10, 1200 Brussels, Belgium<br>Université Catholique de Louvain, Avenue Mounier 52, 1200 Brussels, Belgium                                                  |
| 20 | Fertility Clinic and Research Laboratory on Human Reproduction, CUB-Erasme Hospital, Université Libre de Bruxelles (ULB), 808 route de Lennik, 1070 Brussels, Belgium                                                                               |
| 21 | Centre for Reproductive Medicine of UZ Brussel, Laarbeeklaan 101, 1090 Brussels, Belgium                                                                                                                                                            |
| 22 | Gynecological Endocrinology and Reproductive Medicine Division, Obstetrics and Gynecology Department, Cologne University Hospital, Cologne, Germany                                                                                                 |
| 23 | Center for Reproduction and Transplantation, Magee-Womens Hospital, University of Pittsburgh Medical Center, 300 Halket Street, Pittsburgh, PA 15,213, USA                                                                                          |
| 24 | University of Cincinnati, Department of Obstetrics and Gynecology, Division for REI, Cincinnati, OH 45,229, USA<br>Cincinnati Children's Hospital Medical Center, Division of Pediatric Adolescent Gynecology Pediatric, Cincinnati, OH 45,229, USA |
| 25 | Urology Department, UCSF Medical Center, University of California, San Francisco, CA 94,143, USA<br>Obstetrics and Gynecology Department, UCSF Medical Center, University of California, San Francisco, CA 94,143, USA                              |

from oncofertility medical teams from surveyed centers were collected, reviewed, and analyzed.

To analyze the collected data, we developed a new scoring system, 'the oncofertility score' [14, 15]. As previously described, the oncofertility score is a new diagnostic tool to measure the availability and degree of utilization of oncofertility options for cancer patients in a treating center, country, or group of centers or countries. Although empirical, the oncofertility score could be also used as a prognostic tool to follow up on the development of oncofertility options and strategies provided to cancer patients over time especially in absence of accurate national oncofertility registries. The oncofertility score is calculated as a percentile ratio between the actual and maximal points of utilization that an

oncofertility option might have (Table 2 & Fig. 2). When a fertility preservation option is available and always used for cancer patients, it is given (Yes + + + +) that weighs 100 actual points (25 points per each +). When a fertility preservation option is available and commonly used for cancer patients, it is given (Yes + + +) that weighs 75 actual points (25 points per each +). When a fertility preservation option is available but occasionally used for cancer patients, it is given (Yes + +) that weighs 50 actual points (25 points per each +). When a fertility preservation option is available but rarely used or only used in research settings for cancer patients, it is given (Yes +) that weighs 25 actual points (25 points per each +). When a fertility preservation option is not available, it is given (No) that weighs 0 actual points. When

**Table 2** Oncofertility Score calculation

| Availability and utilization of an oncofertility option | Available and always used for cancer patients | Available and commonly used for cancer patients | Available but occasionally used for cancer patients | Available but rarely used or only used in research settings for cancer patients | Not available |
|---------------------------------------------------------|-----------------------------------------------|-------------------------------------------------|-----------------------------------------------------|---------------------------------------------------------------------------------|---------------|
| <b>Scale Symbol</b>                                     | ++++                                          | +++                                             | ++                                                  | +                                                                               | -             |
| <b>Actual Points (AP)</b><br>(25 points per +)          | 100                                           | 75                                              | 50                                                  | 25                                                                              | 0             |
| <b>Maximal Points (MP)</b><br>(100 points per + + + +)  | 100                                           | 100                                             | 100                                                 | 100                                                                             | 100           |
| <b>Oncofertility Score = AP/MP (%)</b>                  | 100%                                          | 75%                                             | 50%                                                 | 25%                                                                             | 0%            |

**Fig. 2** Oncofertility Score calculation

$$\text{Oncofertility Score} = \frac{\text{Actual Points (AP) of utilization that an oncofertility option might have}}{\text{Maximal Points (MP) of utilization that an oncofertility option might have}} \%$$

the fertility preservation option is not available to cancer patients because it is still in the preclinical research stage, it is marked with (No\*). The maximal points of utilization that an oncofertility option might have is 100 when it is available and always used for cancer patients and is given (Yes + + + +), (25 points per each +) [14, 15].

In our Repro-Can-OPEN Study Part I & II, the oncofertility score was calculated as a percentile ratio between the total actual points and the total maximal points of utilization that an oncofertility option might have. The total actual points for an oncofertility option equal the sum of actual points for this option in the surveyed centers. The total maximal points for an oncofertility option equal 100 points multiplied by the number of surveyed centers [14, 15].

## Results

Based on data collected in the Repro-Can-OPEN Study Part I & II, all 39 surveyed centers responded to all questions. The oncofertility scores (%) for options provided to young female patients with breast cancer in the 14 centers with limited resource settings versus in the 25 centers with optimum resource settings, respectively, were as follows (Table 3 & Fig. 3):

### Available fertility preservation options before anticancer treatment

Embryo freezing (55.35 vs 66), egg freezing (58.92 vs 77), ovarian tissue freezing (28.57 vs 49), oocyte in vitro maturation (IVM) (28.57 vs 23) and artificial ovary (1.78 vs 2).

### Available fertility preservation options during anticancer treatment

GnRH analogs (55.35 vs 61), fractionation of chemo- and radiotherapy (62.5 vs 62) and neoadjuvant cytoprotective pharmacotherapy (1.78 vs 5).

### Available fertility restoration options after anticancer treatment

Frozen embryo transfer (53.57 vs 64), IVF/ICSI of frozen oocytes (55.35 vs 75), autotransplantation of frozen ovarian tissue (19.64 vs 43) and stem cells reproductive technology (3.57 vs 0).

## Discussion

### Oncofertility options and scores for breast cancer in limited versus optimum resource settings

In our Repro-Can-OPEN Study Part I & II, the responses for breast cancer and their calculated oncofertility scores (Table 3 & Fig. 3) showed the following characteristics: (1) Higher oncofertility scores in optimum resource settings than in limited resource settings especially for established options, (2) frequent utilization of egg freezing, embryo freezing, ovarian tissue freezing, GnRH analogs, and fractionation of chemo- and radiotherapy, (3) promising utilization of oocyte in vitro maturation (IVM), (4) rare utilization of neoadjuvant cytoprotective pharmacotherapy, artificial ovary, and stem cells reproductive technology as

**Table 3** Oncofertility Options and Scores (%) for Breast Cancer in Limited versus Optimum Resource Settings, based on empirical data from 39 surveyed centers in Repro-Can-OPEN Study Part I & II [14, 15]

| Oncofertility Options and Scores (%) for Breast Cancer               | Centers with Limited Resource Settings (Repro-Can-OPEN Study I) (n = 14) | Centers with Optimum Resource Settings (Repro-Can-OPEN Study II) (n = 25) |
|----------------------------------------------------------------------|--------------------------------------------------------------------------|---------------------------------------------------------------------------|
| Available fertility preservation options before anticancer treatment |                                                                          |                                                                           |
| Embryo freezing                                                      | 55.35                                                                    | 66                                                                        |
| Egg freezing                                                         | 58.92                                                                    | 77                                                                        |
| Ovarian tissue freezing                                              | 28.57                                                                    | 49                                                                        |
| Oocyte in vitro maturation (IVM)                                     | 28.57                                                                    | 23                                                                        |
| Artificial ovary                                                     | 1.78                                                                     | 2                                                                         |
| Available fertility preservation options during anticancer treatment |                                                                          |                                                                           |
| GnRH analogs                                                         | 55.35                                                                    | 61                                                                        |
| Fractionation of chemo- and radiotherapy                             | 62.5                                                                     | 62                                                                        |
| Neoadjuvant cytoprotective pharmacotherapy                           | 1.78                                                                     | 5                                                                         |
| Available fertility restoration options after anticancer treatment   |                                                                          |                                                                           |
| Frozen embryo transfer                                               | 53.57                                                                    | 64                                                                        |
| IVF/ICSI of frozen oocytes                                           | 55.35                                                                    | 75                                                                        |
| Autotransplantation of frozen ovarian tissue                         | 19.64                                                                    | 43                                                                        |
| Stem cells reproductive technology                                   | 3.57                                                                     | 0                                                                         |

**Fig. 3** Oncofertility Options and Scores (%) for Breast Cancer in Limited versus Optimum Resource Settings, based on empirical data from 39 surveyed centers in Repro-Can-OPEN Study Part I & II [14, 15]

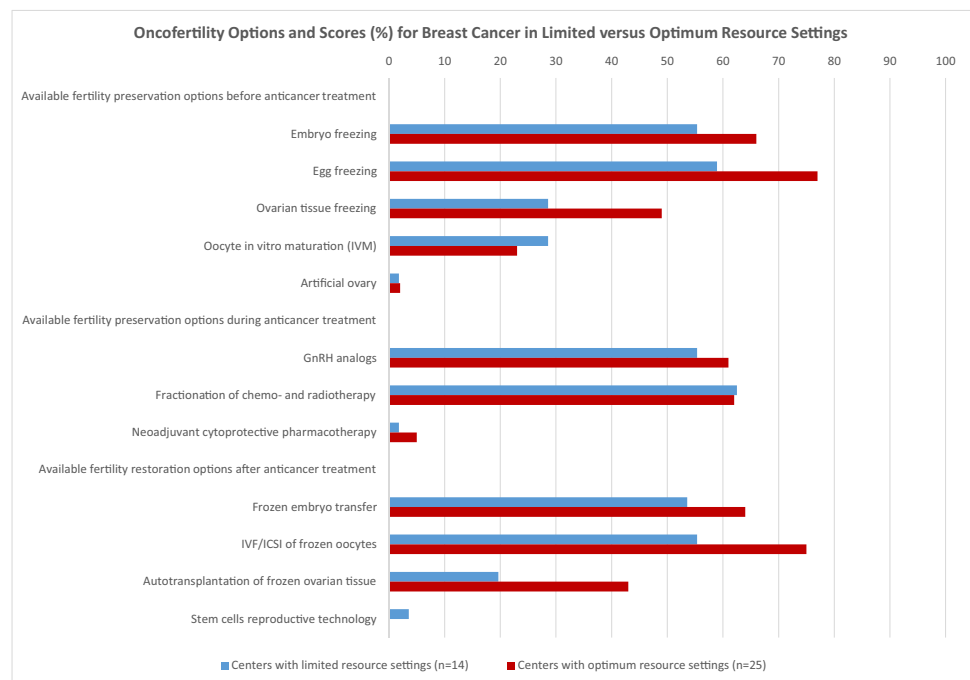

they are still in preclinical or early clinical research settings, (5) recognition that proper technical and ethical concerns should be considered when offering advanced and innovative oncofertility options to patients including ovarian tissue freezing and autotransplantation, oocyte in vitro maturation (IVM), artificial ovary technology, neoadjuvant

cytoprotective pharmacotherapy and stem cells reproductive technology. Technically, the aforementioned advanced and innovative oncofertility options are sophisticated procedures that require well-resourced oncofertility centers with expert teams of oncologists, reproductive endocrinology and infertility specialists, gynecologists, biologists, embryologists,

scientists, and transplantation surgeons. Early referral of breast cancer patients to highly specialized oncofertility centers is strongly recommended.

Recently in 2019, the American Society for Reproductive Medicine Committee Opinion on fertility preservation in patients undergoing gonadotoxic therapies stated that ovarian tissue freezing and autotransplantation should be considered an established medical procedure and no longer considered experimental [4]. Afterwards in 2020, the ESHRE guideline also considered ovarian tissue freezing and autotransplantation non-experimental but used the term ‘innovative’ rather than established to reflect the evidence base [5]. However, oocyte in vitro maturation (IVM), artificial ovary technology, neoadjuvant cytoprotective pharmacotherapy and stem cells reproductive technology are still considered experimental and have limited data on efficacy, and it is essential that they are offered to patients strictly under clear ethical regulations. Obtaining ethical approval from the Institutional Review Board (IRB) or the equivalent ethics committee is essential, as is obtaining informed consent from the patients. Informed consent for experimental medical treatments and interventions should include the explanation of the procedures, benefits, risks, alternative treatments, and information about the expected outcome and costs. Several oncofertility options are expensive and not fully covered by health insurance in many states and countries, leaving many patients under acute financial pressure at the time of a life-altering cancer diagnosis. In such complex situations, doctors and patient navigators as well as patient support and advocacy organizations can play an important role in reassuring and guiding patients [16–18].

**General considerations for oncofertility care of breast cancer**

Based on the responses and their calculated oncofertility scores (Table 3 & Fig. 3), we propose to design and install plausible oncofertility programs for breast cancer as an extrapolation for a best practice model (Table 4). Existing literature and international oncofertility guidelines and recommendations were also considered [3–6, 19–35]. Immediately after a breast cancer diagnosis, we recommend early referrals of patients to the oncofertility team to review the cancer therapy plan and estimate the related risk of gonadotoxicity and subsequent fertility loss. The risk of anticancer therapy-induced gonadotoxicity and fertility loss depends mainly on the type and stage of the disease, type and dose of anticancer therapy as well as the age of the patient and her ovarian reserve at the time of treatment. If the risk of gonadotoxicity and fertility loss is detected or even unknown, a comprehensive multidisciplinary oncofertility strategy should be offered before, during and after anticancer therapy.

**Table 4** Suggested best practice model: Plausible fertility preservation and restoration strategies for breast cancer patients

| Cancer Patients                                                 | Before anticancer therapy (Fertility Preservation)                                                                                                                                                                                                                                            | During anticancer therapy (Fertility Preservation)                                                                                                                                                                                                                                                   | After anticancer therapy (Fertility Restoration)                                                                                                                                                                                                                                                                         |
|-----------------------------------------------------------------|-----------------------------------------------------------------------------------------------------------------------------------------------------------------------------------------------------------------------------------------------------------------------------------------------|------------------------------------------------------------------------------------------------------------------------------------------------------------------------------------------------------------------------------------------------------------------------------------------------------|--------------------------------------------------------------------------------------------------------------------------------------------------------------------------------------------------------------------------------------------------------------------------------------------------------------------------|
| <b>Breast Cancer</b><br>Patients with or without BRCA mutations | <ul style="list-style-type: none"> <li>- Egg freezing</li> <li>- Embryo freezing</li> <li>- Ovarian tissue freezing</li> <li>- In vitro maturation (IVM) of oocytes and vitrification</li> <li>- Artificial ovary technology (promising in research but not yet clinically proven)</li> </ul> | <ul style="list-style-type: none"> <li>- GnRH analogs</li> <li>- Fractionation of chemo- and radiotherapy</li> <li>- Ovarian shielding in case of combined pelvic irradiation</li> <li>- Neoadjuvant cytoprotective pharmacotherapy (promising in research but not yet clinically proven)</li> </ul> | <ul style="list-style-type: none"> <li>- Intrauterine transfer of frozen embryo</li> <li>- IVF/ICSI of frozen oocytes</li> <li>- Autotransplantation of frozen ovarian tissue (should be utilized with caution in BRCA mutations)</li> <li>- Stem cells (promising in research but not yet clinically proven)</li> </ul> |

From a practical point of view, an effective oncofertility strategy should be individualized and tailored to the patient's circumstances and it may integrate various established, debatable, and experimental options after proper counseling and obtaining informed consent from the patient. It is recommended that a proposed oncofertility strategy should include at least one cryopreservation option. After complete cure or extended remission from cancer, and when the patient decides to have biological children, a new assessment of reproductive function should be performed. If anticancer therapy-induced premature ovarian insufficiency (POI), fertility restoration may be achieved by using the cryopreserved eggs, embryos or ovarian tissue [36–38].

### Installing oncofertility programs for female patients with breast cancer

In addition to breast cancer patients, women with *BRCA* mutations have several concerns that can affect their reproductive potential. A recent study showed that women with *BRCA* mutations not only have a lower basal ovarian reserve but also are more likely to lose it after chemotherapy. These findings highlight the importance of offering fertility preservation options to such patients [39]. Furthermore, women with *BRCA* mutations carry significantly higher risks to develop breast and ovarian cancers (Hereditary Breast-Ovarian Cancer Syndrome; HBOC), and they should receive appropriate oncofertility care as well. According to a recent large study, the cumulative breast cancer risk is 72% for *BRCA1* and 69% for *BRCA2* carriers, while the cumulative ovarian cancer risk is 44% for *BRCA1* and 17% for *BRCA2* carriers [40].

Unique medical challenges in oncofertility programs for breast cancer exist and include (1) conventional ovarian stimulation prior to egg or embryo freezing results in elevated serum estradiol levels that should be avoided in estrogen sensitive malignancies such as breast cancer, (2) autotransplantation of frozen ovarian tissue in patients with *BRCA* mutations should be handled with caution due to significantly higher risks of developing ovarian cancer [41–44].

According to the aforementioned unique medical challenges as well as the responses from the 39 surveyed centers and their calculated oncofertility scores (Table 3 & Fig. 3), we suggest installing the following oncofertility programs for breast cancer as a best practice model (Table 4). **Before initiation of anticancer therapy**, cryopreservation of eggs or embryos should be attempted with a random-start protocol for controlled ovarian stimulation and using letrozole or tamoxifen to avoid high estradiol levels [45, 46]. Cryopreservation of ovarian tissue can be attempted especially when controlled ovarian stimulation is not feasible. In vitro maturation and further vitrification of oocytes retrieved in-vivo or ex-vivo from the extracted ovarian tissue (ovarian tissue

oocytes in vitro maturation; OTO-IVM) could be attempted [47–49]. Artificial ovary technology is still experimental and cannot be relied upon alone as an effective oncofertility option. Although experimental, oocyte IVM and artificial ovary technology aim to provide safe alternatives to avoid future ovarian tissue autotransplantation and any potential risk of reintroducing malignant cells. **During anticancer therapy**, GnRH analog administration before and during chemotherapy should be considered for reducing the risk of POI but it should not be considered a stand-alone fertility preservation strategy. Fractionation of chemo- and radiotherapy could be attempted whenever deemed feasible by the oncologists. Neoadjuvant cytoprotective pharmacotherapy is still experimental and not yet clinically proven as an effective oncofertility option [50]. **After anticancer therapy**, fertility restoration may be achieved by frozen embryo transfer, or in vitro fertilization of stored oocytes. Patients with *BRCA* mutations could be advised to consider preimplantation genetic testing (PGT) during in vitro fertilization to avoid transmitting the mutation [51]. Autotransplantation of frozen ovarian tissue can be offered to restore fertility but it should be handled with caution in patients with *BRCA* mutations due to significantly higher risks of developing ovarian cancer. Proper ovarian tissue assessment in patients with *BRCA* mutations is mandatory to reduce the risk of reintroducing malignant cells with autotransplantation. For additional safety measures, it may be a possible option for patients with *BRCA* mutations to remove the transplanted ovarian tissue as well as the remaining ovary (if any) after childbearing is complete and at the time of an elective caesarian section. Stem cell reproductive technology may be promising in research settings but it is not yet clinically proven as an effective oncofertility option (Table 4).

After installation of these specific oncofertility programs for breast cancer, we encourage using the 'oncofertility score' as a prognostic tool to follow up on the development of these new oncofertility programs over time.

In cases where oncofertility options are rejected, contraindicated, infeasible, unsuccessful or unavailable, adoption and third-party reproduction, such as sperm, egg, and embryo donation and surrogacy can be offered as family building alternatives [11].

Limitations of Repro-Can-OPEN Study Part I & II included the small sample size (14 vs 25 surveyed centers with limited and optimum resource settings, respectively) making statistical significance difficult to attain, the empirical status of data collected on the availability and degree of utilization of oncofertility options, and lack of data on success rates of the oncofertility options due to absence of national registries for cancer and IVF treatments in many developing countries involved in the study [14, 15]. Despite challenges, many opportunities exist to improve oncofertility practice in limited resource settings and create potential

for the future including improved cancer survival rates and improved success rates of several oncofertility options as well as emergence of new promising technologies. The Oncofertility Consortium will continue to engage more stakeholders from the USA and abroad to help build a sustainable oncofertility core competency worldwide according to the Oncofertility Consortium Vision 2030 [52].

## Conclusion

In our Repro-Can-OPEN Study Part I & II, the responses for breast cancer and their calculated oncofertility scores showed the following characteristics: (1) higher oncofertility scores in optimum resource settings than in limited resource settings especially for established options, (2) frequent utilization of egg freezing, embryo freezing, ovarian tissue freezing, GnRH analogs, and fractionation of chemo- and radiotherapy, (3) promising utilization of oocyte in vitro maturation (IVM), (4) rare utilization of neoadjuvant cytoprotective pharmacotherapy, artificial ovary, and stem cells reproductive technology as they are still in preclinical or early clinical research settings, (5) recognition that proper technical and ethical concerns should be considered when offering advanced and innovative oncofertility options. Although challenging, oncofertility teams working in limited resource settings should be encouraged and supported. Dissemination of our comparisons and recommendations will provide efficient oncofertility edification and modeling to oncofertility teams and related healthcare providers around the globe and help them offer the best care possible to their breast cancer patients.

**Acknowledgements** Collaborators of Repro-Can-OPEN Study Part I. Salama M, Ataman-Millhouse L, Braham M, Berjeb K, Khrouf M, Rodrigues JK, Reis FM, Silva TC, Sánchez F, Romero S, Smitz J, Vásquez L, Vega M, Sobral F, Terrado G, Lombardi MG, Scarella A, Bourlon MT, Verduzco-Aguirre H, Sánchez AM, Adiga SK, Tholeti P, Udupa KS, Mahajan N, Patil M, Dalvi R, Venter C, Demetriou G, Geel J, Quintana R, Rodriguez G, Quintana T, Viale L, Fraguglia M, Coirini M, Remolina-Bonilla YA, Noguera JAR, Velásquez JC, Suarez A, Arango GD, Pineda JID, Aldecoa MDC, Javed M, Al Sufyan H, Daniels N, Oranye BC, Ogunmokun AA, Onwuzurigbo KI, Okereke CJ, Whesu TC, Woodruff TK. Collaborators of Repro-Can-OPEN Study Part II. Salama M, Laronda MM, Rowell E, Erickson L, Goldman K, Smith K, Pavone M, Duncan FE, Brannigan R, Ataman-Millhouse L, Patrizio P, Rodriguez-Wallberg KA, Okutsu-Horage Y, Suzuki N, Lambertini M, Stern C, Gomez-Lobo V, Maher JY, Hsieh MH, Moravek MB, Anazodo A, Westphal LM, Anderson RA, Wallace WH, Mitchell RT, Nahata L, Whiteside S, Senapati S, Shah DK, Gracia C, Fino ME, Blakemore JK, Quinn GP, Krüssel JS, Baston-Büst DM, Liebethron J, Andersen CY, Kristensen SG, Mamsen LS, Jayasinghe Y, Su HI, Dolmans MM, Amorim CA, Demeestere I, De Vos M, Van Moer E, Isachenko V, Isachenko E, Mallmann P, Rahimi G, Valli-Pulaski H, Steimer SR, McMahon KV, Orwig KE, Rios JS, Smith JF, Mok-Lin E, Woodruff TK.

## Declarations

**Disclosure** The authors have declared no conflicts of interest.

## References

1. Fidler MM, Gupta S, Soerjomataram I, Ferlay J, Steliarova-Foucher E, Bray F. Cancer incidence and mortality among young adults aged 20–39 years worldwide in 2012: a population-based study. *Lancet Oncol.* 2017;18(12):1579–89.
2. Blondeaux E, Massarotti C, Fontana V, Poggio F, Arecco L, Fregatti P, Bighin C, Giannubilo I, Ruelle T, Razeti MG, Boni L, Anserini P, Del Mastro L, Lambertini M. The PREgnancy and FERtility (PREFER) Study Investigating the Need for Ovarian Function and/or Fertility Preservation Strategies in Premenopausal Women With Early Breast Cancer. *Front Oncol.* 2021;11:690320.
3. Oktay K, Harvey BE, Partridge AH, Quinn GP, Reinecke J, Taylor HS, Wallace WH, Wang ET, Loren AW. Fertility Preservation in Patients With Cancer: ASCO Clinical Practice Guideline Update. *J Clin Oncol.* 2018;36(19):1994–2001.
4. Practice Committee of the American Society for Reproductive Medicine (ASRM). Fertility preservation in patients undergoing gonadotoxic therapy or gonadectomy: a committee opinion. *Fertil Steril.* 2019;112(6):1022–33.
5. ESHRE Guideline Group on Female Fertility Preservation, Anderson RA, Amant F, Braat D, D'Angelo A, de Sousa Chuva, Lopes SM, Demeestere I, Dwek S, Frith L, Lambertini M, Maslin C, Moura-Ramos M, Nogueira D, Rodriguez-Wallberg K, Vermeulen N. ESHRE guideline: female fertility preservation. *Hum Reprod Open.* 2020;2020(4):hoaa052.
6. Lambertini M, Peccatori FA, Demeestere I, Amant F, Wyns C, Stukenborg JB, Paluch-Shimon S, Halaska MJ, Uzan C, Meissner J, von Wolff M, Anderson RA, Jordan K. ESMO Guidelines Committee. Fertility preservation and post-treatment pregnancies in post-pubertal cancer patients: ESMO Clinical Practice Guidelines. *Ann Oncol.* 2020;31(12):1664–78.
7. Oncofertility Consortium - Michigan State University [Internet]. [cited 2021 May 14]. Available from: <<http://oncofertility.msu.edu/>>
8. Oncofertility Professional Engagement Network (OPEN) - Michigan State University [Internet]. [cited 2021 May 14]. Available from: <<http://oncofertility.msu.edu/oncofertility-professional-engagement-network>>
9. Ataman LM, Rodrigues JK, Marinho RM, et al. Creating a Global Community of Practice for Oncofertility. *J Glob Oncol.* 2016;2(2):83–96.
10. Rashedi A, de Roo SF, Ataman L, et al. A survey of fertility preservation options available to cancer patients around the globe. *J Glob Oncol.* 2018;4:1–16.
11. Rashedi A, de Roo SF, Ataman L, et al. A survey of third-party parenting options associated with fertility preservation available to patients with cancer around the globe. *J Glob Oncol.* 2018;4:1–7.
12. Salama M, Ataman L, Taha T, et al. Building Oncofertility Core Competency in Developing Countries: Experience from Egypt, Tunisia, Brazil, Peru, and Panama. *J Glob Oncol.* 2018;4:1–11.
13. Salama M, Ataman-Millhouse L, Sobral F, et al. Barriers and Opportunities of Oncofertility Practice in Nine Developing Countries and the Emerging Oncofertility Professional Engagement Network. *J Glob Oncol.* 2018;4:1–7.
14. Salama M, Ataman-Millhouse L, Braham M, et al. Installing oncofertility programs for common cancers in limited resource settings (Repro-Can-OPEN Study): An extrapolation during the

- global crisis of Coronavirus (COVID-19) pandemic. *J Assist Reprod Genet.* 2020;37(7):1567–77.
15. Practice Committee of the Oncofertility Consortium. Installing oncofertility programs for common cancers in optimum resource settings (Repro-Can-OPEN Study Part II): a committee opinion. *J Assist Reprod Genet.* 2021;38(1):163–76.
  16. Anazodo A, Laws P, Logan S, Saunders C, Travaglia J, Gerstl B, Bradford N, Cohn R, Birdsall M, Barr R, Suzuki N, Takae S, Marinho R, Xiao S, Qiong-Hua C, Mahajan N, Patil M, Gunasheela D, Smith K, Sender L, Melo C, Almeida-Santos T, Salama M, Appiah L, Su I, Lane S, Woodruff TK, Pacey A, Anderson RA, Shenfield F, Ledger W, Sullivan E. How can we improve oncofertility care for patients? A systematic scoping review of current international practice and models of care. *Hum Reprod Update.* 2019;25(2):159–79.
  17. Anazodo A, Laws P, Logan S, Saunders C, Travaglia J, Gerstl B, Bradford N, Cohn R, Birdsall M, Barr R, Suzuki N, Takae S, Marinho R, Xiao S, Chen QH, Mahajan N, Patil M, Gunasheela D, Smith K, Sender L, Melo C, Almeida-Santos T, Salama M, Appiah L, Su I, Lane S, Woodruff TK, Pacey A, Anderson RA, Shenfield F, Sullivan E, Ledger W. The Development of an International Oncofertility Competency Framework: A Model to Increase Oncofertility Implementation. *Oncologist.* 2019. pii: theoncologist.2019-0043.
  18. Salama M, Woodruff TK. Anticancer treatments and female fertility: clinical concerns and role of oncologists in oncofertility practice. *Expert Rev Anticancer Ther.* 2017;17(8):687–92.
  19. Peccatori FA, Azim HA Jr, Orecchia R, Hoekstra HJ, Pavlidis N, Kacic V, Pentheroudakis G; ESMO Guidelines Working Group. Cancer, pregnancy and fertility: ESMO Clinical Practice Guidelines for diagnosis, treatment and follow-up. *Ann Oncol.* 2013;24 Suppl 6:vi160-vi170.
  20. Loren AW, Mangu PB, Beck LN, Brennan L, Magdalinski AJ, Partridge AH, Quinn G, Wallace WH, Oktay K; American Society of Clinical Oncology. Fertility preservation for patients with cancer: American Society of Clinical Oncology clinical practice guideline update. *J Clin Oncol.* 2013;31(19):2500–2510.
  21. Practice Committee of American Society for Reproductive Medicine. Fertility preservation in patients undergoing gonadotoxic therapy or gonadectomy: a committee opinion. *Fertil Steril.* 2013;100(5):1214–23.
  22. Ethics Committee of American Society for Reproductive Medicine. Fertility preservation and reproduction in patients facing gonadotoxic therapies: a committee opinion. *Fertil Steril.* 2013;100(5):1224–31.
  23. Martinez F. Update on fertility preservation from the Barcelona International Society for Fertility Preservation-ESHRE-ASRM 2015 expert meeting: indications, results and future perspectives. *Hum Reprod.* 2017;32(9):1802–11.
  24. Coccia PF, Pappo AS, Beaupin L, Borges VF, Borinstein SC, Chugh R, Dinner S, Folbrecht J, Frazier AL, Goldsby R, Gubin A, Hayashi R, Huang MS, Link MP, Livingston JA, Matloub Y, Millard F, Oeffinger KC, Puccetti D, Reed D, Robinson S, Rosenberg AR, Sanft T, Spraker-Perlman HL, von Mehren M, Wechsler DS, Whelan KF, Yeager N, Gurski LA, Shead DA. Adolescent and Young Adult Oncology, Version 2.2018. NCCN Clinical Practice Guidelines in Oncology. *J Natl Compr Canc Netw.* 2018;16(1):66–97.
  25. Donnez J, Dolmans MM. Fertility Preservation in Women. *N Engl J Med.* 2017;377(17):1657–65.
  26. Schüring AN, Fehm T, Behringer K, Goekenjan M, Wimberger P, Henes M, Henes J, Fey MF, von Wolff M. Practical recommendations for fertility preservation in women by the FertiPROTEKT network. Part I: Indications for fertility preservation. *Arch Gynecol Obstet.* 2018;297(1):241–55.
  27. von Wolff M, Germeyer A, Liebenthron J, Korell M, Nawroth F. Practical recommendations for fertility preservation in women by the FertiPROTEKT network. Part II: fertility preservation techniques. *Arch Gynecol Obstet.* 2018;297(1):257–67.
  28. von Wolff M, Andersen CY, Woodruff TK, Nawroth F. FertiPROTEKT, Oncofertility Consortium and the Danish Fertility-Preservation Networks - What Can We Learn From Their Experiences? *Clin Med Insights Reprod Health.* 2019;13:1179558119845865.
  29. Van der Ven H, Liebenthron J, Beckmann M, et al. Ninety-five orthotopic transplantations in 74 women of ovarian tissue after cytotoxic treatment in a fertility preservation network: tissue activity, pregnancy and delivery rates. *Hum Reprod.* 2016;31(9):2031–41.
  30. Dittrich R, Kliesch S, Schüring A, et al. Fertility Preservation for Patients with Malignant Disease. Guideline of the DGGG, DGU and DGRM (S2k-Level, AWMF Registry No.015/082, November 2017) - Recommendations and Statements for Girls and Women. *Geburtshilfe Frauenheilkd.* 2018;78(6):567–584.
  31. Lotz L, Dittrich R, Hoffmann I, Beckmann MW. Ovarian Tissue Transplantation: Experience From Germany and Worldwide Efficacy. *Clin Med Insights Reprod Health.* 2019;13:1179558119867357.
  32. Rodriguez-Wallberg KA, Tanbo T, Tinkanen H, et al. Ovarian tissue cryopreservation and transplantation among alternatives for fertility preservation in the Nordic countries - compilation of 20 years of multicenter experience. *Acta Obstet Gynecol Scand.* 2016;95(9):1015–26.
  33. Rodriguez-Wallberg KA, Marklund A, Lundberg F, et al. A prospective study of women and girls undergoing fertility preservation due to oncologic and non-oncologic indications in Sweden-Trends in patients' choices and benefit of the chosen methods after long-term follow up. *Acta Obstet Gynecol Scand.* 2019;98(5):604–15.
  34. Gellert SE, Pors SE, Kristensen SG, Bay-Bjørn AM, Ernst E, Yding AC. Transplantation of frozen-thawed ovarian tissue: an update on worldwide activity published in peer-reviewed papers and on the Danish cohort. *J Assist Reprod Genet.* 2018;35(4):561–70.
  35. Ahmad MF, Sugishita Y, Suzuki-Takahashi Y, Sawada S, Iwahata H, Shiraishi E, Takae S, Horage-Okutsu Y, Suzuki N. Case Report: Young Adults With Breast Cancer: A Case Series of Fertility Preservation Management and Literature Review. *Front Med (Lausanne).* 2021;6(8):670872. <https://doi.org/10.3389/fmed.2021.670872>.
  36. Rodriguez-Wallberg KA, Eloranta S, Krawiec K, Lissmats A, Bergh J, Liljegren A. Safety of fertility preservation in breast cancer patients in a register-based matched cohort study. *Breast Cancer Res Treat.* 2018;167(3):761–9.
  37. Marklund A, Eloranta S, Wikander I, Kitlinski ML, Lood M, Nedstrand E, Thurin-Kjellberg A, Zhang P, Bergh J, Rodriguez-Wallberg KA. Efficacy and safety of controlled ovarian stimulation using GnRH antagonist protocols for emergency fertility preservation in young women with breast cancer-a prospective nationwide Swedish multicenter study. *Hum Reprod.* 2020;35(4):929–38.
  38. Marklund A, Lundberg FE, Eloranta S, Hedayati E, Pettersson K, Rodriguez-Wallberg KA. Reproductive Outcomes After Breast Cancer in Women With vs Without Fertility Preservation. *JAMA Oncol.* 2021;7(1):86–91.
  39. Oktay KH, Bedoschi G, Goldfarb SB, Taylan E, Titus S, Palomaki GE, Cigler T, Robson M, Dickler MN. Increased chemotherapy-induced ovarian reserve loss in women with germline BRCA mutations due to oocyte deoxyribonucleic acid double strand break repair deficiency. *Fertil Steril.* 2020;113(6):1251–1260.e1.
  40. Kuchenbaecker KB, Hopper JL, Barnes DR, et al. Risks of Breast, Ovarian, and Contralateral Breast Cancer for BRCA1 and BRCA2 Mutation Carriers. *JAMA.* 2017;317(23):2402–16.

41. Lambertini M, Goldrat O, Ferreira AR, et al. Reproductive potential and performance of fertility preservation strategies in BRCA-mutated breast cancer patients. *Ann Oncol*. 2018;29(1):237–43.
42. Lambertini M, Goldrat O, Toss A, et al. Fertility and pregnancy issues in BRCA-mutated breast cancer patients. *Cancer Treat Rev*. 2017;59:61–70.
43. Rodriguez-Wallberg KA, Oktay K. Fertility preservation and pregnancy in women with and without BRCA mutation-positive breast cancer. *Oncologist*. 2012;17(11):1409–17.
44. Lambertini M, Di Maio M, Poggio F, et al. Knowledge, attitudes and practice of physicians towards fertility and pregnancy-related issues in young BRCA-mutated breast cancer patients. *Reprod Biomed Online*. 2019;38(5):835–44.
45. Rodgers RJ, Reid GD, Koch J, Deans R, Ledger WL, Friedlander M, Gilchrist RB, Walters KA, Abbott JA. The safety and efficacy of controlled ovarian hyperstimulation for fertility preservation in women with early breast cancer: a systematic review. *Hum Reprod*. 2017;32(5):1033–45.
46. Bonardi B, Massarotti C, Bruzzone M, Goldrat O, Mangili G, Anserini P, Spinaci S, Arecco L, Del Mastro L, Ceppi M, Demeestere I, Lambertini M. Efficacy and Safety of Controlled Ovarian Stimulation With or Without Letrozole Co-administration for Fertility Preservation: A Systematic Review and Meta-Analysis. *Front Oncol*. 2020;10:574669.
47. Kedem A, Yerushalmi GM, Brengauz M, et al. Outcome of immature oocytes collection of 119 cancer patients during ovarian tissue harvesting for fertility preservation. *J Assist Reprod Genet*. 2018;35(5):851–6.
48. Fasano G, Dechène J, Antonacci R, et al. Outcomes of immature oocytes collected from ovarian tissue for cryopreservation in adult and prepubertal patients. *Reprod Biomed Online*. 2017;34(6):575–82.
49. Pereira N, Hubschmann AG, Lekovich JP, Schattman GL, Rosenwaks Z. Ex vivo retrieval and cryopreservation of oocytes from oophorectomized specimens for fertility preservation in a BRCA1 mutation carrier with ovarian cancer. *Fertil Steril*. 2017;108(2):357–60.
50. Yu KD, Ge JY, Liu XY, Mo M, He M, Shao ZM; SPECTRUM Investigators. Cyclophosphamide-free Adjuvant Chemotherapy for Ovarian Protection in Young Women with Breast Cancer: a Randomized Phase 3 Trial. *J Natl Cancer Inst*. 2021 Apr 2:djab065. <https://doi.org/10.1093/jnci/djab065>. Epub ahead of print.
51. Vuković P, Peccatori FA, Massarotti C, Miralles MS, Beketić-Orešković L, Lambertini M. Preimplantation genetic testing for carriers of BRCA1/2 pathogenic variants. *Crit Rev Oncol Hematol*. 2021;157:103201.
52. Woodruff TK, Ataman-Millhouse L, Acharya KS, et al. A View from the past into our collective future: the oncofertility consortium vision statement. *J Assist Reprod Genet*. 2021;38(1):3–15.

**Publisher's note** Springer Nature remains neutral with regard to jurisdictional claims in published maps and institutional affiliations.

## Authors and Affiliations

Mahmoud Salama<sup>1</sup>  · M. Lambertini<sup>2,3</sup> · MS Christianson<sup>4</sup> · Y. Jayasinghe<sup>5,6</sup> · A. Anazodo<sup>7</sup> · M. De Vos<sup>8</sup> · F. Amant<sup>9,10</sup> · C. Stern<sup>11,12</sup> · L. Appiah<sup>13</sup> · T. L. Woodard<sup>14</sup> · R. A. Anderson<sup>15</sup> · L. M. Westphal<sup>16</sup> · R. E. Leach<sup>1</sup> · K. A. Rodriguez-Wallberg<sup>17,18</sup> · P. Patrizio<sup>19</sup> · Teresa K. Woodruff<sup>1</sup>

M. Lambertini  
matteo.lambertini@unige.it

MS Christianson  
mchris21@jhmi.edu

Y. Jayasinghe  
Yasmin.jayasinghe@unimelb.edu.au

A. Anazodo  
Antoinette.anazodo@health.nsw.gov.au

M. De Vos  
Michel.devos@uzbrussel.be

F. Amant  
frederic.amant@uzleuven.be

C. Stern  
Kate.stern@mivf.com.au

L. Appiah  
leslie.appiah@cuanschutzu.edu

T. L. Woodard  
tlwoodard@mdanderson.org

R. A. Anderson  
Richard.anderson@ed.ac.uk

L. M. Westphal  
lynnw@stanford.edu

R. E. Leach  
rleach@msu.edu

K. A. Rodriguez-Wallberg  
kenny.rodriguez-wallberg@ki.se

P. Patrizio  
pasquale.patrizio@yale.edu

<sup>1</sup> Oncofertility Consortium, Michigan State University, 965 Wilson Road, Room A626B, East Lansing, MI 48824-1316, USA

<sup>2</sup> Department of Medical Oncology, UOC Clinica Di Oncologia Medica, IRCCS Ospedale Policlinico San Martino, Genova, Italy

<sup>3</sup> Department of Internal Medicine and Medical Specialties (DiMI), School of Medicine, University of Genova, Genova, Italy

<sup>4</sup> Division of Reproductive Endocrinology and Infertility, Johns Hopkins Fertility Center, Johns Hopkins University School of Medicine, 10751 Falls Road, Suite 280, Lutherville, MD 21093, USA

<sup>5</sup> Royal Children's Hospital, Flemington Rd, Parkville, Melbourne, Vic 3054, Australia

<sup>6</sup> Department of Obstetrics & Gynecology, Royal Womens Hospital Melbourne, Parkville, Australia



- <sup>7</sup> Fertility Research Centre, Royal Hospital for Women, Barker Street, Sydney, Australia
- <sup>8</sup> Centre for Reproductive Medicine of UZ Brussel, Laarbeeklaan 101, 1090 Brussels, Belgium
- <sup>9</sup> Department of Oncology, KU Leuven, Leuven, Belgium
- <sup>10</sup> Department of Surgery, Netherlands Cancer Institute, Amsterdam, the Netherlands
- <sup>11</sup> Fertility Preservation Service, Reproductive Services Unit, Royal Women's Hospital, Parkville 3051, Australia
- <sup>12</sup> Fertility Preservation Service, Melbourne IVF, East Melbourne 3002, Australia
- <sup>13</sup> Department of Obstetrics and Gynecology, University of Colorado School of Medicine, Aurora, CO, USA
- <sup>14</sup> Department of Gynecologic Oncology and Reproductive Medicine, MD Anderson Oncofertility Program, The University of Texas MD Anderson Cancer Center, Houston, TX, USA
- <sup>15</sup> MRC Centre for Reproductive Health, University of Edinburgh, Edinburgh, UK
- <sup>16</sup> Stanford University Hospital, 300 Pasteur Drive, Stanford, CA, USA
- <sup>17</sup> Department of Oncology-Pathology, Karolinska University Hospital, 14186 Stockholm, Sweden
- <sup>18</sup> Department of Reproductive Medicine, Division of Gynecology and Reproduction, Karolinska University Hospital, 14186 Stockholm, Sweden
- <sup>19</sup> Yale Fertility Center and Yale Fertility Preservation Program, 200 West Campus Dr, Orange, CT 06477, USA
